# Supplementary material
Source: PubMed Central journal article supplement (PMC2799766)
Supplement: 0908562106_ST1_PDF.pdf [file 0908562106_ST1_PDF.pdf]

**Table S1.** Fold changes in gene expression for *X. fastidiosa* cells grown on XFM media compared with PWG

| Gene name | Function                                   | Fold changes |                    |                    |                    |                    |                               |
|-----------|--------------------------------------------|--------------|--------------------|--------------------|--------------------|--------------------|-------------------------------|
|           |                                            | XFM/PWG      | XFM-<br>pectin/XFM | XFM-<br>glucan/XFM | XFM-<br>pectin/PWG | XFM-<br>glucan/PWG | XFM-<br>pectin/XFM-<br>glucan |
| PD0001    | chromosomal replication initiation protein | 1.097 up     | 1.198 down         | 1.058 down         | 1.092 down         | 1.036 up           | 1.132 down                    |
| PD0002    | DNA polymerase III subunit beta            | 1.039 up     | 1.001 down         | 1.139 up           | 1.037 up           | 1.184 up           | 1.141 down                    |
| PD0003    | recombination protein F                    | 1.004 up     | 1.214 up           | 1.182 up           | 1.219 up           | 1.187 up           | 1.027 up                      |
| PD0004    | hypothetical protein                       | 1.164 up     | 1.146 down         | 1.006 up           | 1.015 up           | 1.172 up           | 1.154 down                    |
| PD0005    | DNA gyrase subunit B                       | 1.247 up     | 1.108 up           | 1.027 up           | 1.382 up           | 1.281 up           | 1.079 up                      |
| PD0006    | hypothetical protein                       | 1.063 up     | 1.002 down         | 1.236 down         | 1.060 up           | 1.162 down         | 1.233 up                      |
| PD0007    | hypothetical protein                       | 1.311 down   | 1.265 up           | 1.068 up           | 1.036 down         | 1.226 down         | 1.183 up                      |
| PD0008    | hypothetical protein                       | 1.287 up     | 1.138 down         | 1.277 down         | 1.131 up           | 1.008 up           | 1.121 up                      |
| PD0009    | TonB protein                               | 1.037 down   | 1.073 down         | 1.050 up           | 1.114 down         | 1.012 up           | 1.128 down                    |
| PD0010    | biopolymer transport ExbB protein          | 1.046 down   | 1.155 up           | 1.016 up           | 1.103 up           | 1.029 down         | 1.136 up                      |
| PD0011    | biopolymer transport ExbD1 protein         | 1.146 up     | 1.152 down         | 1.215 up           | 1.005 down         | 1.393 up           | 1.400 down                    |
| PD0012    | biopolymer transport ExbD2 protein         | 1.031 up     | 1.140 up           | 1.010 down         | 1.175 up           | 1.021 up           | 1.151 up                      |
| PD0013    | dipeptidyl-peptidase                       | 1.154 up     | 1.262 down         | 1.369 down         | 1.093 down         | 1.186 down         | 1.085 up                      |
| PD0014    | hypothetical protein                       | 1.159 down   | 1.327 up           | 1.086 up           | 1.145 up           | 1.066 down         | 1.222 up                      |
| PD0015    | coproporphyrinogen III oxidase             | 1.258 down   | 1.115 down         | 1.067 down         | 1.404 down         | 1.343 down         | 1.045 down                    |
| PD0017    | hypothetical protein                       | 1.162 up     | 1.247 down         | 1.007 down         | 1.073 down         | 1.153 up           | 1.238 down                    |
| PD0018    | 3-deoxy-7-phosphoheptulonate synthase      | 1.117 up     | 1.203 down         | 1.101 down         | 1.076 down         | 1.014 up           | 1.092 down                    |

|        |                                            |            |            |            |            |            |            |
|--------|--------------------------------------------|------------|------------|------------|------------|------------|------------|
| PD0019 | pre-pilin like leader sequence             | 1.166 down | 1.145 down | 1.147 down | 1.336 down | 1.338 down | 1.001 up   |
| PD0020 | pre-pilin leader sequence                  | 1.035 down | 1.062 up   | 1.075 down | 1.026 up   | 1.112 down | 1.142 up   |
| PD0021 | hypothetical protein                       | 1.192 up   | 1.263 down | 1.493 down | 1.059 down | 1.252 down | 1.182 up   |
| PD0022 | PilX protein                               | 1.021 down | 1.137 up   | 1.066 up   | 1.113 up   | 1.044 up   | 1.066 up   |
| PD0023 | PilY1 protein homolog                      | 1.165 down | 1.208 down | 1.256 down | 1.407 down | 1.463 down | 1.040 down |
| PD0024 | PilE protein                               | 1.136 up   | 1.087 up   | 1.015 up   | 1.236 up   | 1.153 up   | 1.071 up   |
| PD0025 | orotidine 5'-phosphate decarboxylase       | 1.108 down | 1.039 up   | 1.012 up   | 1.066 down | 1.094 down | 1.025 up   |
| PD0026 | aspartate aminotransferase                 | 1.069 up   | 1.059 up   | 1.199 up   | 1.133 up   | 1.282 up   | 1.131 down |
| PD0027 | large-conductance mechanosensitive channel | 1.183 up   | 1.001 down | 1.305 down | 1.182 up   | 1.102 down | 1.303 up   |
| PD0028 | hypothetical protein                       | 1.376 down | 1.445 up   | 1.086 up   | 1.049 up   | 1.266 down | 1.329 up   |
| PD0029 | hypothetical protein                       | 1.465 up   | 1.043 down | 1.327 down | 1.404 up   | 1.103 up   | 1.272 up   |
| PD0030 | hypothetical protein                       | 1.166 down | 1.082 up   | 1.208 up   | 1.078 down | 1.035 up   | 1.116 down |
| PD0031 | transformation competence-related protein  | 1.076 up   | 1.047 down | 1.095 down | 1.027 up   | 1.017 down | 1.046 up   |
| PD0032 | hypothetical protein                       | 1.210 down | 1.251 up   | 1.041 up   | 1.034 up   | 1.161 down | 1.201 up   |
| PD0033 | transcription-repair coupling factor       | 1.153 down | 1.052 down | 1.052 up   | 1.213 down | 1.095 down | 1.107 down |
| PD0034 | 3-dehydroquinate dehydratase               | 1.104 down | 1.008 down | 1.139 down | 1.114 down | 1.257 down | 1.129 up   |
| PD0035 | acetyl-CoA carboxylase                     | 1.241 up   | 1.089 down | 1.108 down | 1.139 up   | 1.119 up   | 1.017 up   |
| PD0036 | acetyl-CoA carboxylase                     | 1.069 down | 1.189 up   | 1.068 up   | 1.112 up   | 1.000 down | 1.113 up   |
| PD0037 | DNA helicase II                            | 1.474 down | 1.531 up   | 1.517 up   | 1.038 up   | 1.028 up   | 1.009 up   |
| PD0038 | flavohemoprotein                           | 1.068 down | 1.230 down | 1.268 down | 1.315 down | 1.354 down | 1.030 up   |

|        |                                          |            |            |            |            |            |            |
|--------|------------------------------------------|------------|------------|------------|------------|------------|------------|
| PD0039 | hypothetical protein                     | 1.163 up   | 1.152 down | 1.025 down | 1.009 up   | 1.134 up   | 1.123 down |
| PD0040 | pyridoxal phosphate biosynthetic protein | 1.027 up   | 1.080 up   | 1.181 up   | 1.110 up   | 1.214 up   | 1.093 down |
| PD0041 | transcriptional repressor                | 1.173 down | 1.235 up   | 1.164 up   | 1.052 up   | 1.007 down | 1.060 up   |
| PD0042 | competence protein F                     | 1.201 down | 1.203 down | 1.263 down | 1.446 down | 1.518 down | 1.050 up   |
| PD0043 | biotin synthase                          | 1.208 up   | 1.165 down | 1.223 down | 1.037 up   | 1.012 down | 1.050 up   |
| PD0044 | lipoprotein                              | 1.070 down | 1.210 up   | 1.022 down | 1.130 up   | 1.094 down | 1.237 up   |
| PD0045 | hypothetical protein                     | 1.202 down | 1.059 down | 1.158 down | 1.273 down | 1.392 down | 1.093 up   |
| PD0046 | 4-hydroxybenzoate octaprenyltransferase  | 1.111 down | 1.188 down | 1.430 down | 1.319 down | 1.588 down | 1.203 up   |
| PD0053 | formamidopyrimidine-DNA glycosylase      | 1.124 down | 1.122 up   | 1.173 down | 1.001 down | 1.319 down | 1.317 up   |
| PD0054 | hypothetical protein                     | 1.132 up   | 1.139 up   | 1.070 down | 1.290 up   | 1.057 up   | 1.220 up   |
| PD0055 | signal recognition particle protein      | 1.258 up   | 1.204 up   | 1.177 up   | 1.516 up   | 1.481 up   | 1.023 up   |
| PD0056 | hypothetical protein                     | 1.047 down | 1.071 down | 1.294 down | 1.122 down | 1.355 down | 1.208 up   |
| PD0057 | hypothetical protein                     | 1.089 down | 1.152 down | 1.005 down | 1.255 down | 1.096 down | 1.145 down |
| PD0058 | fimbrial adhesin precursor               | 1.065 up   | 1.042 up   | 1.021 down | 1.110 up   | 1.043 up   | 1.064 up   |
| PD0060 | outer membrane usher protein precursor   | 1.065 up   | 1.201 up   | 1.094 up   | 1.279 up   | 1.166 up   | 1.097 up   |
| PD0061 | chaperone protein precursor              | 1.038 up   | 1.021 up   | 1.144 up   | 1.060 up   | 1.187 up   | 1.119 down |
| PD0062 | fimbrial subunit precursor               | 1.056 up   | 1.390 up   | 1.271 up   | 1.467 up   | 1.342 up   | 1.093 up   |
| PD0063 | hypothetical protein                     | 1.046 up   | 1.156 up   | 1.127 up   | 1.210 up   | 1.179 up   | 1.025 up   |
| PD0064 | alpha-ketoglutarate permease symporter   | 1.009 up   | 1.162 up   | 1.050 up   | 1.173 up   | 1.060 up   | 1.105 up   |
| PD0065 | GTP-binding protein                      | 1.084 down | 1.124 down | 1.215 down | 1.220 down | 1.318 down | 1.080 up   |

|        |                                                    |            |            |            |            |            |            |
|--------|----------------------------------------------------|------------|------------|------------|------------|------------|------------|
| PD0066 | RNA-binding protein Hfq                            | 1.287 up   | 1.195 up   | 1.272 up   | 1.539 up   | 1.637 up   | 1.063 down |
| PD0067 | tRNA delta(2)-isopentenylpyrophosphate transferase | 1.036 up   | 1.023 up   | 1.194 down | 1.060 up   | 1.152 down | 1.222 up   |
| PD0068 | dihydropteroate synthase                           | 1.016 down | 1.178 down | 1.007 up   | 1.197 down | 1.008 down | 1.187 down |
| PD0069 | hypothetical protein                               | 1.046 down | 1.559 up   | 1.253 up   | 1.490 up   | 1.198 up   | 1.243 up   |
| PD0070 | cell division protein                              | 1.097 up   | 1.147 down | 1.181 down | 1.045 down | 1.076 down | 1.029 up   |
| PD0071 | cell division protein                              | 1.047 down | 1.104 up   | 1.058 down | 1.054 up   | 1.109 down | 1.169 up   |
| PD0072 | hypothetical protein                               | 1.008 up   | 1.013 up   | 1.014 up   | 1.022 up   | 1.023 up   | 1.000 down |
| PD0073 | hypothetical protein                               | 1.103 up   | 1.342 down | 1.092 down | 1.216 down | 1.010 up   | 1.228 down |
| PD0074 | dihydroxy-acid dehydratase                         | 1.053 down | 1.023 up   | 1.198 up   | 1.028 down | 1.138 up   | 1.170 down |
| PD0075 | hypothetical protein                               | 1.131 down | 1.219 up   | 1.346 up   | 1.077 up   | 1.189 up   | 1.104 down |
| PD0076 | glycosyl transferase                               | 1.127 down | 1.028 down | 1.199 down | 1.160 down | 1.352 down | 1.165 up   |
| PD0077 | membrane protein                                   | 1.046 up   | 1.139 up   | 1.059 up   | 1.192 up   | 1.108 up   | 1.075 up   |
| PD0078 | lipid A biosynthesis lauroyl acyltransferase       | 1.032 down | 1.122 up   | 1.376 up   | 1.087 up   | 1.333 up   | 1.225 down |
| PD0079 | 3-deoxy-D-manno-octulosonic-acid transferase       | 1.157 down | 1.133 up   | 1.052 up   | 1.020 down | 1.099 down | 1.076 up   |
| PD0080 | hypothetical protein                               | 1.093 down | 1.108 down | 1.178 down | 1.212 down | 1.289 down | 1.063 up   |
| PD0081 | 30S ribosomal protein S16                          | 1.311 down | 1.154 up   | 1.202 up   | 1.135 down | 1.090 down | 1.041 down |
| PD0082 | 16S rRNA-processing protein                        | 1.274 down | 1.210 up   | 1.301 up   | 1.052 down | 1.021 up   | 1.075 down |
| PD0083 | tRNA (guanine-N(1)-)-methyltransferase             | 1.100 down | 1.109 up   | 1.056 up   | 1.008 up   | 1.041 down | 1.049 up   |
| PD0084 | 50S ribosomal protein L19                          | 1.189 down | 1.302 down | 1.243 down | 1.549 down | 1.478 down | 1.048 down |
| PD0085 | methionine aminopeptidase                          | 1.097 down | 1.005 up   | 1.206 up   | 1.091 down | 1.098 up   | 1.199 down |

|        |                                                                |            |            |            |            |            |            |
|--------|----------------------------------------------------------------|------------|------------|------------|------------|------------|------------|
| PD0086 | 2,3,4,5-tetrahydropyridine-2-carboxylate N-succinyltransferase | 1.265 up   | 1.334 down | 1.298 down | 1.054 down | 1.026 down | 1.027 down |
| PD0087 | hypothetical protein                                           | 1.087 up   | 1.317 up   | 1.023 up   | 1.433 up   | 1.113 up   | 1.286 up   |
| PD0088 | succinyl-diaminopimelate desuccinylase                         | 1.063 down | 1.031 down | 1.009 up   | 1.097 down | 1.053 down | 1.041 down |
| PD0089 | asparagine synthetase B                                        | 1.100 down | 1.065 up   | 1.031 down | 1.032 down | 1.134 down | 1.098 up   |
| PD0090 | hypothetical protein                                           | 1.095 up   | 1.127 up   | 1.094 up   | 1.234 up   | 1.198 up   | 1.030 up   |
| PD0091 | hypothetical protein                                           | 1.111 up   | 1.065 up   | 1.280 down | 1.184 up   | 1.152 down | 1.364 up   |
| PD0092 | LexA repressor                                                 | 1.080 down | 1.029 down | 1.174 up   | 1.111 down | 1.087 up   | 1.209 down |
| PD0093 | recombinase A                                                  | 1.149 up   | 1.070 down | 1.127 up   | 1.074 up   | 1.296 up   | 1.206 down |
| PD0094 | alanyl-tRNA synthetase                                         | 1.057 up   | 1.147 up   | 1.015 up   | 1.213 up   | 1.073 up   | 1.130 up   |
| PD0095 | carbon storage regulator                                       | 1.087 down | 1.512 up   | 1.158 up   | 1.390 up   | 1.065 up   | 1.305 up   |
| PD0097 | oligopeptidase A                                               | 1.229 up   | 1.140 up   | 1.107 up   | 1.402 up   | 1.361 up   | 1.029 up   |
| PD0098 | cysteine synthase                                              | 1.043 up   | 1.468 down | 1.232 down | 1.407 down | 1.180 down | 1.192 down |
| PD0099 | hypothetical protein                                           | 1.065 up   | 1.473 down | 1.756 down | 1.382 down | 1.648 down | 1.192 up   |
| PD0100 | copper resistance protein A precursor                          | 1.140 down | 1.148 up   | 1.193 up   | 1.006 up   | 1.046 up   | 1.039 down |
| PD0101 | copper resistance protein B precursor                          | 1.174 up   | 1.007 up   | 1.173 down | 1.183 up   | 1.000 up   | 1.182 up   |
| PD0102 | valyl-tRNA synthetase                                          | 1.014 up   | 1.040 up   | 1.095 up   | 1.055 up   | 1.111 up   | 1.052 down |
| PD0103 | hypothetical protein                                           | 1.033 up   | 1.158 down | 1.023 down | 1.120 down | 1.009 up   | 1.131 down |
| PD0104 | DNA polymerase III subunit chi                                 | 1.202 down | 1.270 down | 1.286 down | 1.527 down | 1.547 down | 1.012 up   |
| PD0105 | hypothetical protein                                           | 1.191 up   | 1.421 down | 1.484 down | 1.193 down | 1.245 down | 1.043 up   |
| PD0106 | leucyl aminopeptidase                                          | 1.200 down | 1.306 up   | 1.453 up   | 1.088 up   | 1.211 up   | 1.112 down |

|        |                                                   |            |            |            |            |            |            |
|--------|---------------------------------------------------|------------|------------|------------|------------|------------|------------|
| PD0107 | hypothetical protein                              | 1.042 down | 1.030 down | 1.160 up   | 1.073 down | 1.113 up   | 1.195 down |
| PD0108 | hypothetical protein                              | 1.165 up   | 1.069 down | 1.082 down | 1.089 up   | 1.076 up   | 1.011 up   |
| PD0109 | hypothetical protein                              | 1.067 down | 1.201 down | 1.060 down | 1.282 down | 1.132 down | 1.132 down |
| PD0110 | D-fructose-6-phosphate amidotransferase           | 1.026 up   | 1.072 up   | 1.154 up   | 1.100 up   | 1.184 up   | 1.076 down |
| PD0111 | hypothetical protein                              | 1.160 up   | 1.286 down | 1.106 down | 1.109 down | 1.048 up   | 1.163 down |
| PD0112 | spermidine synthase                               | 1.022 up   | 1.336 up   | 1.034 up   | 1.366 up   | 1.056 up   | 1.292 up   |
| PD0113 | arginine decarboxylase                            | 1.071 down | 1.142 up   | 1.048 up   | 1.065 up   | 1.021 down | 1.088 up   |
| PD0114 | oxidoreductase                                    | 1.027 down | 1.020 down | 1.107 down | 1.048 down | 1.138 down | 1.085 up   |
| PD0115 | hypothetical protein                              | 1.239 down | 1.179 up   | 1.008 up   | 1.050 down | 1.228 down | 1.169 up   |
| PD0116 | arginyl-tRNA synthetase                           | 1.012 up   | 1.293 down | 1.359 down | 1.276 down | 1.342 down | 1.051 up   |
| PD0117 | DNA repair protein RadC                           | 1.019 up   | 1.686 down | 1.500 down | 1.654 down | 1.472 down | 1.124 down |
| PD0118 | phosphopantothenylcysteine synthase/decarboxylase | 1.163 up   | 1.045 up   | 1.029 down | 1.216 up   | 1.130 up   | 1.076 up   |
| PD0119 | deoxyuridine 5'-triphosphate nucleotidohydrolase  | 1.024 down | 1.105 down | 1.092 up   | 1.132 down | 1.066 up   | 1.207 down |
| PD0120 | phosphomannomutase                                | 1.114 up   | 1.344 up   | 1.045 down | 1.497 up   | 1.065 up   | 1.405 up   |
| PD0121 | hypothetical protein                              | 1.007 up   | 1.053 up   | 1.077 up   | 1.061 up   | 1.085 up   | 1.022 down |
| PD0122 | orotate phosphoribosyltransferase                 | 1.108 up   | 1.180 down | 1.379 down | 1.065 down | 1.245 down | 1.168 up   |
| PD0123 | hypothetical protein                              | 1.219 down | 1.067 down | 1.130 down | 1.302 down | 1.378 down | 1.058 up   |
| PD0124 | hypothetical protein                              | 1.112 up   | 1.021 up   | 1.062 down | 1.136 up   | 1.046 up   | 1.085 up   |
| PD0125 | cysteine protease                                 | 1.205 up   | 1.037 down | 1.394 down | 1.162 up   | 1.156 down | 1.344 up   |
| PD0126 | hypothetical protein                              | 1.100 up   | 1.173 down | 1.039 up   | 1.066 down | 1.144 up   | 1.220 down |

|        |                                                    |            |            |            |            |            |            |
|--------|----------------------------------------------------|------------|------------|------------|------------|------------|------------|
| PD0127 | hypothetical protein                               | 1.155 down | 1.012 up   | 1.321 up   | 1.141 down | 1.143 up   | 1.305 down |
| PD0128 | exodeoxyribonuclease                               | 1.023 down | 1.234 down | 1.021 up   | 1.263 down | 1.001 down | 1.260 down |
| PD0129 | beta-lactamase induction signal transducer protein | 1.225 up   | 1.235 up   | 1.072 down | 1.513 up   | 1.142 up   | 1.324 up   |
| PD0130 | hypothetical protein                               | 1.175 down | 1.159 up   | 1.173 up   | 1.013 down | 1.001 down | 1.012 down |
| PD0131 | metallopeptidase                                   | 1.174 down | 1.190 up   | 1.244 up   | 1.013 up   | 1.059 up   | 1.045 down |
| PD0132 | tyrosyl-tRNA synthetase                            | 1.197 up   | 1.049 down | 1.152 down | 1.141 up   | 1.039 up   | 1.098 up   |
| PD0138 | formamidopyrimidine-DNA glycosylase                | 1.272 up   | 1.162 down | 1.552 down | 1.095 up   | 1.219 down | 1.335 up   |
| PD0139 | hypothetical protein                               | 1.062 up   | 1.068 up   | 1.043 up   | 1.134 up   | 1.107 up   | 1.024 up   |
| PD0140 | hypothetical protein                               | 1.284 up   | 1.161 down | 1.093 down | 1.106 up   | 1.174 up   | 1.061 down |
| PD0141 | 3-ketoacyl-(acyl-carrier-protein) reductase        | 1.262 up   | 1.226 down | 1.109 down | 1.029 up   | 1.137 up   | 1.105 down |
| PD0142 | peptide chain release factor 3                     | 1.194 up   | 1.077 down | 1.325 down | 1.107 up   | 1.110 down | 1.229 up   |
| PD0143 | hemolysin III protein                              | 1.231 down | 1.090 down | 1.589 down | 1.342 down | 1.957 down | 1.458 up   |
| PD0144 | glycosyl transferase                               | 1.079 down | 1.128 up   | 1.212 up   | 1.045 up   | 1.122 up   | 1.074 down |
| PD0145 | deoxyribonuclease                                  | 1.262 up   | 1.085 up   | 1.135 down | 1.371 up   | 1.111 up   | 1.233 up   |
| PD0146 | outer membrane protein                             | 1.101 down | 1.083 down | 1.026 up   | 1.193 down | 1.073 down | 1.112 down |
| PD0147 | hypothetical protein                               | 1.078 down | 1.086 down | 1.032 down | 1.171 down | 1.113 down | 1.052 down |
| PD0148 | glycine cleavage system protein H                  | 1.195 up   | 1.117 up   | 1.010 down | 1.335 up   | 1.183 up   | 1.128 up   |
| PD0149 | aminomethyltransferase                             | 1.020 up   | 1.133 up   | 1.189 up   | 1.156 up   | 1.213 up   | 1.050 down |
| PD0150 | hypothetical protein                               | 1.040 up   | 1.243 down | 1.345 down | 1.195 down | 1.293 down | 1.081 up   |
| PD0151 | inner membrane protein                             | 1.081 down | 1.228 up   | 1.159 up   | 1.135 up   | 1.072 up   | 1.059 up   |

|        |                                                         |            |            |            |            |            |            |
|--------|---------------------------------------------------------|------------|------------|------------|------------|------------|------------|
| PD0152 | hypothetical protein                                    | 1.139 down | 1.394 up   | 1.129 up   | 1.223 up   | 1.008 down | 1.234 up   |
| PD0153 | sulfite synthesis pathway protein                       | 1.126 up   | 1.038 down | 1.203 up   | 1.084 up   | 1.355 up   | 1.250 down |
| PD0154 | hydrolase                                               | 1.024 down | 1.031 up   | 1.371 down | 1.006 up   | 1.404 down | 1.414 up   |
| PD0155 | adenosylmethionine--8-amino-7-oxononanoate transaminase | 1.062 down | 1.033 up   | 1.030 down | 1.027 down | 1.094 down | 1.065 up   |
| PD0156 | hypothetical protein                                    | 1.064 up   | 1.073 down | 1.137 down | 1.008 down | 1.068 down | 1.059 up   |
| PD0157 | ATP-dependent RNA helicase                              | 1.184 up   | 1.128 down | 1.393 down | 1.050 up   | 1.175 down | 1.234 up   |
| PD0158 | 6-pyruvoyl tetrahydrobiopterin synthase                 | 1.011 up   | 1.007 down | 1.140 up   | 1.003 up   | 1.153 up   | 1.149 down |
| PD0159 | hypothetical protein                                    | 1.196 up   | 1.023 up   | 1.075 down | 1.224 up   | 1.111 up   | 1.101 up   |
| PD0160 | hypothetical protein                                    | 1.342 up   | 1.374 down | 1.072 down | 1.023 down | 1.251 up   | 1.281 down |
| PD0161 | hypothetical protein                                    | 1.297 down | 1.040 up   | 1.021 up   | 1.246 down | 1.269 down | 1.018 up   |
| PD0162 | hypothetical protein                                    | 1.065 down | 1.060 down | 1.032 up   | 1.130 down | 1.031 down | 1.095 down |
| PD0163 | hypothetical protein                                    | 1.125 down | 1.174 up   | 1.283 up   | 1.043 up   | 1.140 up   | 1.092 down |
| PD0164 | acetyl-CoA carboxylase alpha subunit                    | 1.160 down | 1.083 up   | 1.262 up   | 1.071 down | 1.087 up   | 1.165 down |
| PD0165 | DNA polymerase III subunit alpha                        | 1.034 up   | 1.071 up   | 1.110 up   | 1.108 up   | 1.148 up   | 1.035 down |
| PD0166 | phosphoribosylaminoimidazole-succinocarboxamidesynthase | 1.181 down | 1.508 down | 1.481 down | 1.782 down | 1.751 down | 1.017 down |
| PD0167 | DnaJ related chaperone                                  | 1.008 up   | 1.081 up   | 1.191 up   | 1.091 up   | 1.202 up   | 1.101 down |
| PD0168 | ribulose-phosphate 3-epimerase                          | 1.023 up   | 1.135 up   | 1.018 down | 1.162 up   | 1.005 up   | 1.156 up   |
| PD0169 | hypothetical protein                                    | 1.095 down | 1.074 up   | 1.010 down | 1.020 down | 1.107 down | 1.085 up   |
| PD0170 | anthranilate synthase component I                       | 1.122 down | 1.246 up   | 1.253 up   | 1.110 up   | 1.117 up   | 1.005 down |
| PD0171 | anthranilate synthase component II                      | 1.070 up   | 1.098 up   | 1.155 down | 1.176 up   | 1.079 down | 1.269 up   |



|        |                                                                       |            |            |            |            |            |            |
|--------|-----------------------------------------------------------------------|------------|------------|------------|------------|------------|------------|
| PD0172 | anthranilate phosphoribosyltransferase                                | 1.145 up   | 1.329 up   | 1.153 up   | 1.521 up   | 1.320 up   | 1.152 up   |
| PD0173 | indole-3-glycerol-phosphate synthase                                  | 1.107 down | 1.009 up   | 1.168 up   | 1.097 down | 1.054 up   | 1.157 down |
| PD0174 | hypothetical protein                                                  | 1.070 down | 1.018 up   | 1.023 up   | 1.050 down | 1.045 down | 1.004 down |
| PD0175 | transcriptional regulator MarR family                                 | 1.150 up   | 1.049 up   | 1.014 up   | 1.207 up   | 1.167 up   | 1.034 up   |
| PD0177 | proline dipeptidase                                                   | 1.175 up   | 1.092 up   | 1.236 up   | 1.284 up   | 1.453 up   | 1.132 down |
| PD0178 | hypothetical protein                                                  | 1.149 up   | 1.157 down | 1.017 up   | 1.007 down | 1.169 up   | 1.177 down |
| PD0179 | hypothetical protein                                                  | 1.024 down | 1.103 up   | 1.051 down | 1.077 up   | 1.077 down | 1.160 up   |
| PD0180 | queuine tRNA-ribosyltransferase                                       | 1.009 down | 1.053 up   | 1.249 down | 1.044 up   | 1.260 down | 1.316 up   |
| PD0181 | preprotein translocase subunit YajC                                   | 1.085 up   | 1.310 up   | 1.049 down | 1.423 up   | 1.034 up   | 1.375 up   |
| PD0182 | protein export protein SecD                                           | 1.066 up   | 1.083 up   | 1.002 down | 1.156 up   | 1.064 up   | 1.086 up   |
| PD0183 | protein export protein SecF                                           | 1.158 down | 1.032 up   | 1.254 down | 1.122 down | 1.453 down | 1.294 up   |
| PD0185 | polynucleotide adenyltransferase                                      | 1.105 down | 1.372 up   | 1.093 down | 1.242 up   | 1.208 down | 1.501 up   |
| PD0186 | 2-amino-4-hydroxy-6- hydroxymethyl-dihydropteridine pyrophosphokinase | 1.157 up   | 1.206 down | 1.275 down | 1.042 down | 1.102 down | 1.057 up   |
| PD0187 | 3-methyl-2-oxobutanoate hydroxymethyltransferase                      | 1.211 up   | 1.004 down | 1.017 down | 1.205 up   | 1.191 up   | 1.012 up   |
| PD0188 | pantoate--beta-alanine ligase                                         | 1.221 up   | 1.085 up   | 1.137 down | 1.325 up   | 1.074 up   | 1.233 up   |
| PD0189 | aspartate 1-decarboxylase precursor                                   | 1.194 down | 1.263 down | 1.200 down | 1.509 down | 1.434 down | 1.052 down |
| PD0190 | glucose-6-phosphate isomerase                                         | 1.213 up   | 1.161 down | 1.279 down | 1.044 up   | 1.054 down | 1.100 up   |
| PD0192 | hypothetical protein                                                  | 1.022 up   | 1.064 down | 1.131 up   | 1.041 down | 1.156 up   | 1.204 down |
| PD0193 | transcription elongation factor NusA                                  | 1.043 up   | 1.060 up   | 1.258 down | 1.106 up   | 1.206 down | 1.335 up   |
| PD0194 | translation initiation factor IF-2                                    | 1.155 down | 1.061 down | 1.166 down | 1.225 down | 1.346 down | 1.098 up   |

|        |                                                        |            |            |            |            |            |            |
|--------|--------------------------------------------------------|------------|------------|------------|------------|------------|------------|
| PD0195 | ribosome-binding factor A                              | 1.001 down | 1.240 up   | 1.556 up   | 1.239 up   | 1.554 up   | 1.254 down |
| PD0196 | tRNA pseudouridine synthase B                          | 1.123 down | 1.175 up   | 1.250 up   | 1.046 up   | 1.113 up   | 1.063 down |
| PD0197 | 30S ribosomal protein S15                              | 1.131 up   | 1.243 down | 1.063 up   | 1.099 down | 1.203 up   | 1.322 down |
| PD0198 | polynucleotide phosphorylase                           | 1.294 up   | 1.274 up   | 1.233 up   | 1.649 up   | 1.596 up   | 1.032 up   |
| PD0199 | hypothetical protein                                   | 1.169 down | 1.033 up   | 1.079 up   | 1.131 down | 1.083 down | 1.043 down |
| PD0200 | hypothetical protein                                   | 1.445 up   | 1.051 up   | 1.121 up   | 1.519 up   | 1.620 up   | 1.066 down |
| PD0201 | acriflavin resistance protein                          | 1.060 down | 1.104 down | 1.240 down | 1.171 down | 1.314 down | 1.122 up   |
| PD0202 | membrane fusion protein                                | 1.075 up   | 1.101 up   | 1.124 up   | 1.185 up   | 1.209 up   | 1.020 down |
| PD0203 | hypothetical protein                                   | 1.011 down | 1.270 down | 1.390 down | 1.285 down | 1.406 down | 1.094 up   |
| PD0204 | hypothetical protein                                   | 1.387 down | 1.018 down | 1.132 down | 1.412 down | 1.570 down | 1.112 up   |
| PD0205 | ATP-dependent RNA helicase                             | 1.090 up   | 1.067 up   | 1.187 up   | 1.163 up   | 1.295 up   | 1.113 down |
| PD0206 | electron transfer flavoprotein alpha subunit           | 1.107 down | 1.027 down | 1.038 down | 1.138 down | 1.150 down | 1.010 up   |
| PD0207 | electron transfer flavoprotein beta subunit            | 1.085 up   | 1.153 down | 1.152 down | 1.061 down | 1.061 down | 1.000 down |
| PD0208 | dTDP-glucose 4,6-dehydratase                           | 1.050 down | 1.132 up   | 1.015 up   | 1.078 up   | 1.034 down | 1.114 up   |
| PD0209 | glucose-1-phosphate thymidyltransferase                | 1.038 down | 1.039 up   | 1.165 up   | 1.001 up   | 1.121 up   | 1.120 down |
| PD0210 | dTDP-4-dehydrorhamnose 3,5-epimerase                   | 1.158 up   | 1.361 down | 1.447 down | 1.175 down | 1.249 down | 1.063 up   |
| PD0211 | dTDP-4-dehydrorhamnose reductase                       | 1.110 down | 1.079 up   | none       | 1.028 down | 1.110 down | 1.080 up   |
| PD0212 | phosphomannose isomerase-GDP-mannose pyrophosphorylase | 1.038 up   | 1.259 down | 1.186 down | 1.212 down | 1.141 down | 1.061 down |
| PD0213 | phosphoglucomutase                                     | 1.080 up   | 1.089 up   | 1.025 up   | 1.177 up   | 1.108 up   | 1.062 up   |
| PD0214 | hypothetical protein                                   | none       | 1.192 down | 1.254 down | 1.192 down | 1.254 down | 1.052 up   |

|        |                                                                            |            |            |            |            |            |            |
|--------|----------------------------------------------------------------------------|------------|------------|------------|------------|------------|------------|
| PD0215 | colicin V precursor                                                        | 1.018 up   | 1.339 down | 1.007 up   | 1.314 down | 1.026 up   | 1.349 down |
| PD0216 | colicin V precursor                                                        | 1.099 up   | 1.683 down | 1.134 down | 1.531 down | 1.032 down | 1.483 down |
| PD0217 | hypothetical protein                                                       | 1.001 up   | 1.894 down | 1.110 up   | 1.892 down | 1.112 up   | 2.104 down |
| PD0218 | serine protease                                                            | 1.214 up   | 1.020 up   | 1.110 up   | 1.239 up   | 1.348 up   | 1.088 down |
| PD0219 | sugar transporter                                                          | 1.350 down | 1.086 down | 1.313 up   | 1.467 down | 1.028 down | 1.426 down |
| PD0220 | hypothetical protein                                                       | 1.212 down | 1.136 down | 1.260 down | 1.378 down | 1.528 down | 1.109 up   |
| PD0221 | 6-phosphofructokinase                                                      | 1.188 down | 1.085 up   | 1.024 up   | 1.094 down | 1.159 down | 1.059 up   |
| PD0222 | adenylate kinase                                                           | 1.097 down | 1.159 up   | 1.100 up   | 1.056 up   | 1.002 up   | 1.053 up   |
| PD0223 | UDP-N-acetylmuramate:L-alanyl-gamma-D-glutamyl-meso-diaminopimelate ligase | 1.092 up   | 1.071 up   | 1.101 up   | 1.170 up   | 1.203 up   | 1.028 down |
| PD0224 | hypothetical protein                                                       | 1.263 up   | 1.044 up   | 1.008 down | 1.319 up   | 1.253 up   | 1.052 up   |
| PD0225 | serine/threonine protein kinase                                            | 1.255 up   | 1.129 up   | 1.057 up   | 1.418 up   | 1.327 up   | 1.068 up   |
| PD0226 | leucine aminopeptidase                                                     | 1.031 down | 1.087 up   | 1.105 up   | 1.054 up   | 1.072 up   | 1.016 down |
| PD0227 | transport protein                                                          | 1.046 up   | 1.192 up   | 1.083 up   | 1.248 up   | 1.134 up   | 1.100 up   |
| PD0228 | hypothetical protein                                                       | 1.149 down | 1.145 up   | 1.240 down | 1.002 down | 1.425 down | 1.421 up   |
| PD0229 | hypothetical protein                                                       | 1.098 down | 1.011 down | 1.151 up   | 1.111 down | 1.048 up   | 1.164 down |
| PD0230 | hypothetical protein                                                       | 1.353 down | 1.402 up   | 1.219 up   | 1.036 up   | 1.110 down | 1.150 up   |
| PD0231 | heat shock protein                                                         | 1.043 up   | 1.056 up   | 1.121 down | 1.102 up   | 1.074 down | 1.185 up   |
| PD0232 | cell division inhibitor                                                    | 1.002 up   | 1.115 up   | 1.043 down | 1.119 up   | 1.040 down | 1.164 up   |
| PD0233 | regulator of pathenogenicity factors RpfB                                  | 1.088 up   | 1.242 down | 1.098 down | 1.140 down | 1.008 down | 1.131 down |
| PD0234 | aconitate hydratase                                                        | 1.154 up   | 1.310 down | 1.210 down | 1.134 down | 1.048 down | 1.082 down |

|        |                                              |            |            |            |            |            |            |
|--------|----------------------------------------------|------------|------------|------------|------------|------------|------------|
| PD0235 | hypothetical protein                         | 1.008 up   | 1.024 down | 1.011 up   | 1.015 down | 1.020 up   | 1.036 down |
| PD0236 | aconitate hydratase                          | 1.167 down | 1.646 up   | 1.150 up   | 1.409 up   | 1.014 down | 1.430 up   |
| PD0238 | hypothetical protein                         | 1.053 down | 1.066 down | 1.135 down | 1.123 down | 1.196 down | 1.065 up   |
| PD0242 | hypothetical protein                         | 1.296 up   | 1.091 down | 1.140 down | 1.188 up   | 1.136 up   | 1.045 up   |
| PD0243 | hypothetical protein                         | 1.109 up   | 1.041 down | 1.147 down | 1.064 up   | 1.034 down | 1.101 up   |
| PD0244 | hypothetical protein                         | 1.244 up   | 1.472 up   | 1.165 up   | 1.832 up   | 1.449 up   | 1.264 up   |
| PD0245 | triosephosphate isomerase                    | 1.086 up   | 1.075 up   | 1.105 down | 1.167 up   | 1.018 down | 1.189 up   |
| PD0246 | protein-export membrane protein              | 1.109 down | 1.075 down | 1.152 up   | 1.192 down | 1.039 up   | 1.239 down |
| PD0248 | NADH dehydrogenase alpha subunit             | 1.125 up   | 1.024 down | 1.054 down | 1.098 up   | 1.066 up   | 1.029 up   |
| PD0249 | NADH dehydrogenase beta subunit              | 1.156 up   | 1.086 down | 1.097 up   | 1.064 up   | 1.269 up   | 1.192 down |
| PD0250 | NADH dehydrogenase subunit C                 | 1.116 up   | 1.043 down | 1.059 down | 1.070 up   | 1.053 up   | 1.016 up   |
| PD0251 | NADH dehydrogenase delta subunit             | 1.078 down | 1.344 up   | 1.187 up   | 1.247 up   | 1.101 up   | 1.132 up   |
| PD0252 | ATP synthase subunit E                       | 1.176 down | 1.141 up   | 1.248 up   | 1.030 down | 1.061 up   | 1.094 down |
| PD0253 | NADH-ubiquinone oxidoreductase NQO1 subunit  | 1.319 up   | 1.037 up   | 1.043 up   | 1.368 up   | 1.377 up   | 1.006 down |
| PD0254 | NADH dehydrogenase gamma subunit             | 1.075 up   | 1.058 up   | 1.016 up   | 1.137 up   | 1.092 up   | 1.041 up   |
| PD0255 | NADH dehydrogenase subunit H                 | 1.098 up   | 1.048 down | 1.062 down | 1.048 up   | 1.034 up   | 1.013 up   |
| PD0256 | NADH dehydrogenase subunit I                 | 1.394 up   | 1.020 down | 1.202 up   | 1.366 up   | 1.676 up   | 1.226 down |
| PD0257 | NADH dehydrogenase subunit J                 | 1.275 up   | 1.157 up   | 1.068 up   | 1.476 up   | 1.363 up   | 1.083 up   |
| PD0258 | NADH dehydrogenase kappa subunit             | 1.257 up   | 1.115 down | 1.103 down | 1.126 up   | 1.139 up   | 1.010 down |
| PD0259 | NADH-ubiquinone oxidoreductase NQ012 subunit | 1.153 up   | 1.157 down | 1.075 down | 1.003 down | 1.071 up   | 1.076 down |

|        |                                               |            |            |            |            |            |            |
|--------|-----------------------------------------------|------------|------------|------------|------------|------------|------------|
| PD0260 | NADH dehydrogenase subunit M                  | 1.015 down | 1.018 up   | 1.116 down | 1.002 up   | 1.133 down | 1.136 up   |
| PD0261 | NADH dehydrogenase subunit N                  | 1.162 down | 1.267 up   | 1.231 up   | 1.090 up   | 1.060 up   | 1.028 up   |
| PD0262 | acetoacetyl-CoA reductase                     | 1.067 down | 1.122 up   | 1.009 up   | 1.051 up   | 1.057 down | 1.111 up   |
| PD0263 | Mg <sup>++</sup> /citrate complex transporter | 1.142 down | 1.117 up   | 1.105 up   | 1.022 down | 1.033 down | 1.010 up   |
| PD0264 | porin O precursor                             | 1.004 up   | 1.097 down | 1.311 down | 1.093 down | 1.306 down | 1.194 up   |
| PD0265 | two-component system, regulatory protein      | 1.051 up   | 1.245 up   | 1.114 down | 1.309 up   | 1.060 down | 1.388 up   |
| PD0266 | two-component system, sensor protein          | 1.066 up   | 1.463 up   | 1.369 up   | 1.560 up   | 1.460 up   | 1.068 up   |
| PD0267 | periplasmic iron-binding protein              | 1.129 up   | 1.345 down | 1.308 down | 1.191 down | 1.158 down | 1.029 down |
| PD0268 | transcriptional regulator LuxR/UhpA family    | 1.300 down | 1.160 up   | 1.339 up   | 1.121 down | 1.029 up   | 1.154 down |
| PD0269 | sensor histidine kinase                       | 1.006 up   | 1.072 up   | 1.095 down | 1.079 up   | 1.088 down | 1.175 up   |
| PD0270 | polyphosphate-selective porin O               | 1.042 down | 1.141 down | 1.057 up   | 1.189 down | 1.014 up   | 1.206 down |
| PD0271 | C4-dicarboxylate transport protein            | 1.282 up   | 1.045 down | 1.147 down | 1.226 up   | 1.117 up   | 1.097 up   |
| PD0272 | phosphate acetyltransferase                   | 1.279 up   | 1.011 down | 1.053 down | 1.265 up   | 1.214 up   | 1.041 up   |
| PD0273 | heat shock protein 90                         | 1.284 down | 1.095 up   | 1.209 up   | 1.172 down | 1.061 down | 1.104 down |
| PD0274 | hypothetical protein                          | 1.032 up   | 1.241 up   | 1.065 down | 1.282 up   | 1.031 down | 1.323 up   |
| PD0275 | phosphopantetheine adenylyltransferase        | 1.111 down | 1.012 up   | 1.097 up   | 1.096 down | 1.012 down | 1.083 down |
| PD0276 | hypothetical protein                          | 1.006 up   | 1.213 up   | 1.074 down | 1.221 up   | 1.067 down | 1.303 up   |
| PD0277 | ferredoxin                                    | 1.035 down | 1.075 up   | 1.125 down | 1.038 up   | 1.165 down | 1.210 up   |
| PD0278 | gamma-glutamyltranspeptidase                  | 1.164 up   | 1.134 up   | 1.037 down | 1.321 up   | 1.122 up   | 1.177 up   |
| PD0279 | GGDEF family protein                          | 1.053 down | 1.140 up   | 1.172 up   | 1.082 up   | 1.113 up   | 1.027 down |

|        |                                             |            |            |            |            |            |            |
|--------|---------------------------------------------|------------|------------|------------|------------|------------|------------|
| PD0280 | hypothetical protein                        | 1.048 down | 1.123 up   | 1.153 up   | 1.071 up   | 1.100 up   | 1.027 down |
| PD0281 | dihydroorotase                              | 1.426 down | 1.490 up   | 1.295 up   | 1.044 up   | 1.101 down | 1.150 up   |
| PD0282 | hypothetical protein                        | 1.233 down | 1.318 down | 1.247 down | 1.627 down | 1.539 down | 1.057 down |
| PD0283 | DnaK suppressor                             | 1.072 down | 1.050 down | 1.055 up   | 1.126 down | 1.016 down | 1.108 down |
| PD0285 | drug:proton antiporter                      | 1.123 up   | 1.010 down | 1.057 up   | 1.112 up   | 1.187 up   | 1.067 down |
| PD0286 | hypothetical protein                        | 1.271 down | 1.088 up   | 1.067 down | 1.168 down | 1.357 down | 1.162 up   |
| PD0287 | cysteinyl-tRNA synthetase                   | 1.043 down | 1.290 up   | 1.007 up   | 1.237 up   | 1.035 down | 1.281 up   |
| PD0288 | hypothetical protein                        | 1.027 up   | 1.069 up   | 1.019 down | 1.098 up   | 1.007 up   | 1.090 up   |
| PD0289 | hypothetical protein                        | 1.274 down | 1.089 up   | 1.399 up   | 1.170 down | 1.098 up   | 1.284 down |
| PD0290 | ornithine carbamoyltransferase              | 1.076 up   | 1.247 down | 1.516 down | 1.158 down | 1.408 down | 1.215 up   |
| PD0291 | argininosuccinate synthase                  | 1.133 down | 1.007 up   | 1.074 down | 1.124 down | 1.218 down | 1.082 up   |
| PD0292 | acetylmithine deacetylase                   | 1.057 down | 1.213 down | 1.275 down | 1.282 down | 1.348 down | 1.051 up   |
| PD0293 | acetylglutamate kinase                      | 1.275 down | 1.165 up   | 1.168 up   | 1.095 down | 1.092 down | 1.002 down |
| PD0294 | N-acetyl-gamma-glutamyl-phosphate reductase | 1.054 down | 1.160 down | 1.267 down | 1.223 down | 1.336 down | 1.091 up   |
| PD0295 | argininosuccinate lyase                     | 1.192 down | 1.025 up   | 1.131 down | 1.163 down | 1.349 down | 1.160 up   |
| PD0296 | gamma-glutamyl kinase                       | 1.078 up   | 1.473 down | 1.540 down | 1.366 down | 1.429 down | 1.045 up   |
| PD0297 | gamma-glutamyl phosphate reductase          | 1.026 up   | 1.531 down | 1.272 down | 1.492 down | 1.240 down | 1.203 down |
| PD0298 | hypothetical protein                        | 1.453 up   | 1.179 up   | 1.099 down | 1.714 up   | 1.321 up   | 1.297 up   |
| PD0299 | hypothetical protein                        | 1.116 up   | 1.387 up   | 1.427 up   | 1.548 up   | 1.593 up   | 1.029 down |
| PD0300 | hypothetical protein                        | 1.110 down | 1.366 up   | 1.079 up   | 1.230 up   | 1.028 down | 1.265 up   |

|        |                                           |            |            |            |            |            |            |
|--------|-------------------------------------------|------------|------------|------------|------------|------------|------------|
| PD0301 | hypothetical protein                      | 1.349 up   | 1.524 up   | 1.103 down | 2.057 up   | 1.222 up   | 1.682 up   |
| PD0303 | hypothetical protein                      | 1.334 up   | 1.696 up   | 1.225 up   | 2.264 up   | 1.635 up   | 1.384 up   |
| PD0304 | hypothetical protein                      | 1.442 up   | 1.080 down | 1.139 down | 1.335 up   | 1.266 up   | 1.054 up   |
| PD0305 | hemolysin-type calcium binding protein    | 1.253 up   | 1.015 down | 1.012 down | 1.233 up   | 1.237 up   | 1.002 down |
| PD0306 | cytosine deaminase                        | 1.181 down | 1.382 up   | 1.346 up   | 1.170 up   | 1.140 up   | 1.026 up   |
| PD0307 | toxin                                     | 1.091 down | 1.209 up   | 1.075 up   | 1.108 up   | 1.014 down | 1.124 up   |
| PD0308 | putative manganese transport protein MntH | 1.213 up   | 1.072 down | 1.048 down | 1.130 up   | 1.157 up   | 1.023 down |
| PD0309 | arginyl-tRNA-protein transferase          | 1.089 down | 1.135 down | 1.123 down | 1.237 down | 1.224 down | 1.010 down |
| PD0310 | pathogenicity-related protein             | 1.003 down | 1.130 down | 1.458 down | 1.135 down | 1.463 down | 1.289 up   |
| PD0311 | acyl-CoA thioesterase II                  | 1.227 down | 1.152 down | 1.191 down | 1.414 down | 1.462 down | 1.033 up   |
| PD0312 | hypothetical protein                      | 1.053 down | 1.012 up   | 1.095 up   | 1.040 down | 1.039 up   | 1.081 down |
| PD0313 | serine protease                           | 1.742 up   | 1.079 up   | 1.113 down | 1.880 up   | 1.564 up   | 1.201 up   |
| PD0314 | hypothetical protein                      | 1.250 down | 1.898 down | 2.089 down | 2.374 down | 2.613 down | 1.100 up   |
| PD0315 | glutaryl-7-ACA acylase precursor          | 1.089 down | 1.015 up   | 1.074 down | 1.072 down | 1.170 down | 1.091 up   |
| PD0316 | glycerol-3-phosphate acyltransferase      | 1.132 up   | 1.048 down | 1.138 down | 1.080 up   | 1.005 down | 1.086 up   |
| PD0317 | hypothetical protein                      | 1.031 up   | 1.010 up   | 1.135 down | 1.041 up   | 1.101 down | 1.147 up   |
| PD0318 | hypothetical protein                      | 1.491 up   | 1.380 down | 1.106 down | 1.080 up   | 1.347 up   | 1.247 down |
| PD0319 | S-adenosyl-L-homocysteine hydrolase       | 1.072 up   | 1.160 down | 1.202 down | 1.081 down | 1.121 down | 1.036 up   |
| PD0320 | peptide synthase                          | 1.140 up   | 1.105 down | 1.183 down | 1.031 up   | 1.037 down | 1.070 up   |
| PD0321 | ribonuclease HIII                         | 1.036 down | 1.136 up   | 1.264 up   | 1.096 up   | 1.220 up   | 1.112 down |

|        |                                                                     |            |            |            |            |            |            |
|--------|---------------------------------------------------------------------|------------|------------|------------|------------|------------|------------|
| PD0322 | lipid-A-disaccharide synthase                                       | 1.053 down | 1.199 down | 1.157 down | 1.263 down | 1.219 down | 1.036 down |
| PD0323 | UDP-N-acetylglucosamine acyltransferase                             | 1.130 down | 1.053 down | 1.051 up   | 1.191 down | 1.075 down | 1.107 down |
| PD0324 | (3R)-hydroxymyristoyl ACP dehydratase                               | 1.073 up   | 1.308 down | 1.584 down | 1.219 down | 1.475 down | 1.210 up   |
| PD0325 | UDP-3-O-[3-hydroxymyristoyl] glucosamine N-acyltransferase          | 1.105 down | 1.027 down | 1.323 down | 1.135 down | 1.462 down | 1.287 up   |
| PD0326 | outer membrane antigen                                              | 1.016 down | 1.055 up   | 1.046 up   | 1.037 up   | 1.028 up   | 1.008 up   |
| PD0327 | hypothetical protein                                                | 1.096 down | 1.064 up   | 1.038 up   | 1.029 down | 1.055 down | 1.025 up   |
| PD0328 | 1-deoxy-D-xylulose 5-phosphate reductoisomerase                     | 1.183 down | 1.450 up   | 1.156 up   | 1.226 up   | 1.023 down | 1.254 up   |
| PD0329 | phosphatidate cytidyltransferase                                    | 1.125 down | 1.348 up   | 1.130 up   | 1.197 up   | 1.003 up   | 1.192 up   |
| PD0330 | undecaprenyl pyrophosphate synthetase                               | 1.065 down | 1.017 down | 1.024 up   | 1.084 down | 1.040 down | 1.042 down |
| PD0331 | ribosome releasing factor                                           | 1.066 down | 1.002 down | 1.192 down | 1.068 down | 1.271 down | 1.190 up   |
| PD0332 | fatty acid outer membrane porin                                     | 1.169 down | 1.041 down | 1.087 up   | 1.218 down | 1.074 down | 1.133 down |
| PD0333 | hypothetical protein                                                | 1.219 up   | 1.442 down | 1.460 down | 1.182 down | 1.197 down | 1.012 up   |
| PD0334 | hypothetical protein                                                | 1.166 down | 1.048 up   | 1.090 up   | 1.111 down | 1.069 down | 1.039 down |
| PD0336 | hypothetical protein                                                | 1.070 up   | 1.070 up   | 1.269 up   | 1.145 up   | 1.359 up   | 1.186 down |
| PD0337 | uridylate kinase                                                    | 1.008 up   | 1.335 up   | 1.262 up   | 1.347 up   | 1.273 up   | 1.057 up   |
| PD0338 | hypothetical protein                                                | 1.192 down | 1.036 up   | 1.039 down | 1.151 down | 1.239 down | 1.077 up   |
| PD0342 | keto-hydroxyglutarate-aldolase/keto-deoxy-phosphogluconate aldolase | 1.114 down | 1.077 up   | 1.009 down | 1.033 down | 1.124 down | 1.087 up   |
| PD0343 | phosphogluconate dehydratase                                        | 1.067 up   | 1.163 down | 1.082 down | 1.089 down | 1.013 down | 1.074 down |
| PD0344 | 6-phosphogluconolactonase                                           | 1.109 down | 1.072 down | 1.053 down | 1.190 down | 1.168 down | 1.018 down |
| PD0345 | glucokinase                                                         | 1.023 down | 1.222 down | 1.242 down | 1.251 down | 1.271 down | 1.015 up   |



|        |                                                             |            |            |            |            |            |            |
|--------|-------------------------------------------------------------|------------|------------|------------|------------|------------|------------|
| PD0346 | glucose-6-phosphate 1-dehydrogenase                         | 1.141 down | 1.226 down | 1.364 down | 1.399 down | 1.557 down | 1.112 up   |
| PD0347 | sugar ABC transporter ATP-binding protein                   | 1.109 down | 1.032 up   | 1.049 up   | 1.074 down | 1.057 down | 1.015 down |
| PD0348 | hypothetical protein                                        | 1.089 down | 1.090 up   | 1.044 down | 1.001 up   | 1.138 down | 1.139 up   |
| PD0349 | hypothetical protein                                        | 1.026 up   | 1.256 up   | 1.340 up   | 1.290 up   | 1.376 up   | 1.066 down |
| PD0350 | succinate dehydrogenase membrane anchor subunit             | 1.131 up   | 1.002 down | 1.119 down | 1.128 up   | 1.010 up   | 1.116 up   |
| PD0351 | succinate dehydrogenase hydrophobic membrane anchor subunit | 1.021 down | 1.203 up   | 1.164 up   | 1.178 up   | 1.139 up   | 1.033 up   |
| PD0352 | succinate dehydrogenase                                     | 1.078 up   | 1.112 up   | 1.061 down | 1.200 up   | 1.016 up   | 1.181 up   |
| PD0353 | succinate dehydrogenase catalytic subunit                   | 1.014 down | 1.008 up   | 1.196 down | 1.006 down | 1.214 down | 1.206 up   |
| PD0354 | hypothetical protein                                        | 1.105 up   | 1.212 down | 1.066 down | 1.097 down | 1.036 up   | 1.137 down |
| PD0355 | hypothetical protein                                        | 1.214 up   | 1.129 down | 1.159 down | 1.075 up   | 1.048 up   | 1.026 up   |
| PD0356 | lipoprotein releasing system transmembrane protein          | 1.000 up   | 1.060 down | 1.308 down | 1.059 down | 1.307 down | 1.233 up   |
| PD0357 | ABC transporter ATP-binding protein                         | none       | 1.134 up   | 1.166 up   | 1.135 up   | 1.166 up   | 1.027 down |
| PD0358 | DNA uptake protein                                          | 1.000 up   | 1.012 down | 1.096 down | 1.011 down | 1.095 down | 1.082 up   |
| PD0359 | biopolymer transport protein                                | 1.063 up   | 1.129 down | 1.039 down | 1.062 down | 1.022 up   | 1.086 down |
| PD0360 | biopolymer transport protein                                | 1.110 down | 1.320 up   | 1.047 down | 1.189 up   | 1.163 down | 1.383 up   |
| PD0361 | ABC transporter ATP-binding protein                         | 1.034 down | 1.097 up   | 1.105 down | 1.060 up   | 1.143 down | 1.213 up   |
| PD0362 | tetraacyldisaccharide 4'-kinase                             | 1.235 down | 1.006 up   | 1.488 up   | 1.228 down | 1.204 up   | 1.479 down |
| PD0363 | phage-related tail protein                                  | 1.030 up   | 1.540 up   | 1.071 down | 1.587 up   | 1.040 down | 1.650 up   |
| PD0364 | hypothetical protein                                        | 1.287 down | 1.288 up   | 1.001 down | 1.001 up   | 1.289 down | 1.290 up   |
| PD0365 | phage-related tail protein                                  | 1.068 down | 1.023 up   | 1.035 down | 1.043 down | 1.106 down | 1.060 up   |

|        |                                          |            |            |            |            |            |            |
|--------|------------------------------------------|------------|------------|------------|------------|------------|------------|
| PD0366 | phage-related baseplate assembly protein | 1.219 down | 1.872 up   | 1.050 up   | 1.536 up   | 1.160 down | 1.783 up   |
| PD0367 | phage-related baseplate assembly protein | 1.011 down | 1.292 up   | 1.062 up   | 1.278 up   | 1.050 up   | 1.216 up   |
| PD0368 | proteic killer suppression protein       | 1.224 up   | 1.100 down | 1.089 down | 1.113 up   | 1.124 up   | 1.010 down |
| PD0369 | proteic killer active protein            | 1.001 down | 1.123 down | 1.156 down | 1.125 down | 1.158 down | 1.029 up   |
| PD0370 | hypothetical protein                     | 1.166 down | 1.137 up   | 1.016 up   | 1.025 down | 1.147 down | 1.118 up   |
| PD0371 | hypothetical protein                     | 1.116 down | 1.162 down | 1.109 down | 1.297 down | 1.238 down | 1.047 down |
| PD0372 | phage-related baseplate assembly protein | 1.010 up   | 1.264 up   | 1.059 up   | 1.277 up   | 1.070 up   | 1.193 up   |
| PD0373 | hypothetical protein                     | 1.248 down | 1.295 up   | 1.075 down | 1.037 up   | 1.342 down | 1.393 up   |
| PD0374 | hypothetical protein                     | 1.023 down | 1.103 up   | 1.116 down | 1.078 up   | 1.142 down | 1.231 up   |
| PD0375 | hypothetical protein                     | 1.092 up   | 1.183 up   | 1.152 down | 1.293 up   | 1.054 down | 1.364 up   |
| PD0376 | hypothetical protein                     | 1.045 down | 1.092 up   | 1.378 down | 1.045 up   | 1.441 down | 1.506 up   |
| PD0377 | hypothetical protein                     | 1.058 down | 1.468 up   | 1.007 up   | 1.387 up   | 1.050 down | 1.458 up   |
| PD0378 | phage-related portal protein             | 1.139 down | 1.390 up   | 1.011 up   | 1.220 up   | 1.126 down | 1.374 up   |
| PD0379 | phage-related DNA polymerase             | 1.114 down | 1.931 up   | 1.346 up   | 1.732 up   | 1.208 up   | 1.434 up   |
| PD0380 | hypothetical protein                     | 1.182 up   | 1.459 up   | 1.047 up   | 1.725 up   | 1.237 up   | 1.394 up   |
| PD0381 | hypothetical protein                     | 1.058 up   | 5.466 up   | 1.307 up   | 5.787 up   | 1.384 up   | 4.180 up   |
| PD0382 | hypothetical protein                     | 1.076 down | 1.458 up   | 1.248 up   | 1.354 up   | 1.160 up   | 1.167 up   |
| PD0383 | hypothetical protein                     | 1.283 down | 1.304 up   | 1.014 up   | 1.016 up   | 1.266 down | 1.286 up   |
| PD0384 | phage-related integrase                  | 1.266 up   | 1.256 up   | 1.145 up   | 1.592 up   | 1.451 up   | 1.097 up   |
| PD0385 | partition protein                        | 1.297 up   | 1.085 up   | 1.094 down | 1.408 up   | 1.185 up   | 1.188 up   |

|        |                                            |            |            |            |            |            |            |
|--------|--------------------------------------------|------------|------------|------------|------------|------------|------------|
| PD0386 | hypothetical protein                       | 1.312 up   | none       | 1.191 up   | 1.313 up   | 1.563 up   | 1.190 down |
| PD0387 | hypothetical protein                       | 1.097 down | 1.088 down | 1.282 up   | 1.194 down | 1.168 up   | 1.395 down |
| PD0388 | cardiolipin synthase                       | 1.184 down | 1.163 up   | 1.041 up   | 1.018 down | 1.137 down | 1.117 up   |
| PD0389 | hypothetical protein                       | 1.046 up   | 1.259 down | 1.167 down | 1.203 down | 1.115 down | 1.079 down |
| PD0390 | hypothetical protein                       | 1.001 up   | 1.320 down | 1.504 down | 1.318 down | 1.501 down | 1.139 up   |
| PD0391 | L-asparaginase                             | 1.213 down | 1.107 up   | 1.211 down | 1.095 down | 1.470 down | 1.341 up   |
| PD0392 | tryptophan repressor binding protein       | 1.008 down | 1.082 down | 1.137 down | 1.091 down | 1.148 down | 1.051 up   |
| PD0393 | nicotinate phosphoribosyltransferase       | 1.055 down | 1.196 up   | 1.386 up   | 1.134 up   | 1.313 up   | 1.158 down |
| PD0394 | hypothetical protein                       | 1.095 up   | 1.080 up   | 1.120 down | 1.183 up   | 1.022 down | 1.210 up   |
| PD0395 | hypothetical protein                       | 1.062 down | 1.238 down | 1.178 down | 1.315 down | 1.251 down | 1.050 down |
| PD0396 | DNA polymerase I                           | 1.117 up   | 1.077 up   | 1.182 down | 1.204 up   | 1.058 down | 1.275 up   |
| PD0397 | dihydrodipicolinate reductase              | 1.158 down | 1.015 down | 1.152 up   | 1.176 down | 1.005 down | 1.170 down |
| PD0398 | carbamoyl-phosphate synthase small subunit | 1.153 up   | 1.087 up   | 1.073 down | 1.254 up   | 1.074 up   | 1.167 up   |
| PD0399 | carbamoyl-phosphate synthase large subunit | 1.299 down | 1.308 up   | 1.052 up   | 1.007 up   | 1.234 down | 1.243 up   |
| PD0400 | transcription elongation factor GreA       | 1.067 up   | 1.359 up   | 1.046 up   | 1.451 up   | 1.117 up   | 1.299 up   |
| PD0401 | regulatory protein                         | 1.165 up   | 1.018 down | 1.096 down | 1.144 up   | 1.063 up   | 1.076 up   |
| PD0402 | single-stranded DNA exonuclease            | 1.272 down | 1.133 down | 1.023 up   | 1.442 down | 1.243 down | 1.159 down |
| PD0403 | peptide chain release factor 2             | 1.164 up   | 1.102 down | 1.066 up   | 1.057 up   | 1.242 up   | 1.175 down |
| PD0404 | lysyl-tRNA synthetase                      | 1.036 up   | 1.205 down | 1.014 down | 1.162 down | 1.021 up   | 1.187 down |
| PD0405 | response regulator                         | 1.105 up   | 1.119 down | 1.027 down | 1.012 down | 1.076 up   | 1.089 down |

|        |                                                                     |            |            |            |            |            |            |
|--------|---------------------------------------------------------------------|------------|------------|------------|------------|------------|------------|
| PD0406 | regulator of pathogenicity factors                                  | 1.020 up   | 1.032 up   | 1.241 up   | 1.053 up   | 1.265 up   | 1.201 down |
| PD0407 | enoyl-CoA hydratase                                                 | 1.156 up   | 1.98 up    | 1.750 up   | 2.288 up   | 2.023 up   | 1.423 up   |
| PD0408 | bifunctional aspartate kinase/diaminopimelate decarboxylase protein | 1.045 down | 1.210 down | 1.121 down | 1.265 down | 1.171 down | 1.080 down |
| PD0409 | hypothetical protein                                                | 1.378 down | 1.165 down | 1.050 down | 1.606 down | 1.448 down | 1.108 down |
| PD0410 | UDP-N-acetylmuramoyl-L-alanyl-D-glutamatesynthetase                 | 1.026 down | 1.119 up   | 1.190 up   | 1.090 up   | 1.159 up   | 1.063 down |
| PD0412 | hypothetical protein                                                | 1.361 up   | 1.124 up   | 1.046 up   | 1.531 up   | 1.424 up   | 1.074 up   |
| PD0413 | 5,10-methylenetetrahydrofolate reductase                            | 1.100 down | 1.108 down | 1.001 down | 1.219 down | 1.101 down | 1.106 down |
| PD0414 | outer membrane protein                                              | 1.015 down | 1.085 down | 1.268 down | 1.101 down | 1.287 down | 1.169 up   |
| PD0415 | Maf-like protein                                                    | 1.059 down | 1.170 down | 1.214 down | 1.239 down | 1.286 down | 1.037 up   |
| PD0416 | ribonuclease G                                                      | 1.003 down | 1.084 down | 1.185 down | 1.088 down | 1.189 down | 1.092 up   |
| PD0417 | hypothetical protein                                                | 1.007 down | 1.309 up   | 1.243 up   | 1.300 up   | 1.234 up   | 1.053 up   |
| PD0418 | TldD protein                                                        | 1.183 down | 1.014 up   | 1.058 down | 1.166 down | 1.252 down | 1.074 up   |
| PD0419 | hypothetical protein                                                | 1.325 down | 1.029 down | 1.043 up   | 1.365 down | 1.270 down | 1.075 down |
| PD0420 | PmbA protein                                                        | 1.025 down | 1.229 up   | 1.152 up   | 1.198 up   | 1.123 up   | 1.067 up   |
| PD0421 | transcriptional regulator                                           | 1.119 down | 1.129 down | 1.181 down | 1.265 down | 1.322 down | 1.045 up   |
| PD0422 | tryptophan repressor binding protein                                | 1.038 down | 1.006 down | 1.153 up   | 1.044 down | 1.110 up   | 1.160 down |
| PD0423 | NADP-alcohol dehydrogenase                                          | 1.022 up   | 1.274 down | 1.221 down | 1.246 down | 1.195 down | 1.042 down |
| PD0424 | hypothetical protein                                                | 1.135 down | 1.222 up   | 1.279 up   | 1.076 up   | 1.126 up   | 1.045 down |
| PD0425 | UDP-N-acetylglucosamine pyrophosphorylase                           | 1.128 down | 1.161 down | 1.196 down | 1.309 down | 1.349 down | 1.030 up   |
| PD0426 | chorismate mutase                                                   | 1.018 up   | 1.116 down | 1.120 down | 1.096 down | 1.099 down | 1.003 up   |

|        |                              |            |            |            |            |            |            |
|--------|------------------------------|------------|------------|------------|------------|------------|------------|
| PD0427 | ATP synthase subunit epsilon | none       | 1.244 down | 1.270 down | 1.243 down | 1.269 down | 1.020 up   |
| PD0428 | ATP synthase subunit B       | 1.007 down | 1.038 down | 1.045 down | 1.045 down | 1.052 down | 1.006 up   |
| PD0429 | ATP synthase subunit C       | 1.056 up   | 1.025 up   | 1.020 down | 1.084 up   | 1.035 up   | 1.046 up   |
| PD0430 | ATP synthase subunit A       | 1.042 up   | 1.061 up   | 1.236 down | 1.106 up   | 1.186 down | 1.312 up   |
| PD0431 | ATP synthase subunit D       | 1.136 down | 1.026 up   | 1.036 up   | 1.107 down | 1.096 down | 1.010 down |
| PD0432 | ATP synthase subunit B       | 1.136 up   | 1.187 up   | 1.061 up   | 1.349 up   | 1.206 up   | 1.118 up   |
| PD0433 | ATP synthase subunit C       | 1.046 down | 1.080 down | 1.039 down | 1.130 down | 1.087 down | 1.038 down |
| PD0434 | ATP synthase subunit A       | 1.130 up   | 1.119 up   | 1.304 down | 1.265 up   | 1.153 down | 1.459 up   |
| PD0435 | hypothetical protein         | 1.039 down | 1.365 up   | 1.244 up   | 1.313 up   | 1.197 up   | 1.097 up   |
| PD0436 | 30S ribosomal protein S10    | 1.320 down | 1.178 up   | 1.042 up   | 1.121 down | 1.267 down | 1.130 up   |
| PD0437 | 50S ribosomal protein L3     | 1.121 up   | 1.080 down | 1.231 down | 1.037 up   | 1.098 down | 1.139 up   |
| PD0438 | 50S ribosomal protein L4     | 1.011 up   | 1.219 up   | 1.199 up   | 1.233 up   | 1.213 up   | 1.016 up   |
| PD0439 | 50S ribosomal protein L23    | 1.400 down | 1.203 up   | 1.083 up   | 1.164 down | 1.292 down | 1.110 up   |
| PD0440 | 50S ribosomal protein L2     | 1.187 up   | 1.081 down | 1.130 down | 1.098 up   | 1.050 up   | 1.044 up   |
| PD0441 | 30S ribosomal protein S19    | 1.200 up   | 1.126 down | 1.079 up   | 1.064 up   | 1.295 up   | 1.216 down |
| PD0442 | 50S ribosomal protein L22    | 1.283 up   | 1.345 down | 1.202 down | 1.048 down | 1.066 up   | 1.118 down |
| PD0443 | 30S ribosomal protein S3     | 1.234 down | 1.230 up   | 1.007 up   | 1.003 down | 1.225 down | 1.221 up   |
| PD0444 | 50S ribosomal protein L16    | 1.035 up   | 1.178 up   | 1.009 down | 1.220 up   | 1.026 up   | 1.189 up   |
| PD0445 | 50S ribosomal protein L29    | 1.026 up   | 1.219 down | 1.146 down | 1.187 down | 1.116 down | 1.063 down |
| PD0446 | 30S ribosomal protein S17    | 1.323 up   | 1.322 down | 1.105 down | 1.000 up   | 1.196 up   | 1.195 down |

|        |                                           |            |            |            |            |            |            |
|--------|-------------------------------------------|------------|------------|------------|------------|------------|------------|
| PD0447 | 50S ribosomal protein L14                 | 1.189 up   | 1.183 down | 1.320 down | 1.005 up   | 1.110 down | 1.115 up   |
| PD0448 | 50S ribosomal protein L24                 | 1.427 up   | 1.059 up   | 1.184 up   | 1.512 up   | 1.691 up   | 1.118 down |
| PD0449 | 50S ribosomal protein L5                  | 1.289 up   | 1.080 down | 1.166 down | 1.194 up   | 1.105 up   | 1.079 up   |
| PD0450 | 30S ribosomal protein S14                 | 1.002 down | 1.118 down | 1.018 down | 1.121 down | 1.021 down | 1.098 down |
| PD0451 | 30S ribosomal protein S8                  | 1.053 up   | 1.065 up   | 1.045 up   | 1.122 up   | 1.100 up   | 1.019 up   |
| PD0452 | 50S ribosomal protein L6                  | 1.069 down | 1.040 up   | 1.062 down | 1.028 down | 1.136 down | 1.105 up   |
| PD0453 | 50S ribosomal protein L18                 | 1.034 down | 1.062 down | 1.005 up   | 1.099 down | 1.029 down | 1.067 down |
| PD0454 | 30S ribosomal protein S5                  | 1.067 up   | 1.167 up   | 1.032 up   | 1.246 up   | 1.102 up   | 1.130 up   |
| PD0455 | 50S ribosomal protein L30                 | 1.001 up   | 1.160 down | 1.019 up   | 1.158 down | 1.021 up   | 1.183 down |
| PD0456 | 50S ribosomal protein L15                 | 1.324 up   | 1.085 down | 1.150 up   | 1.220 up   | 1.524 up   | 1.248 down |
| PD0457 | preprotein translocase SecY               | 1.053 down | 1.008 down | 1.051 up   | 1.062 down | 1.001 down | 1.060 down |
| PD0458 | 30S ribosomal protein S13                 | 1.266 up   | 1.218 up   | 1.024 down | 1.543 up   | 1.235 up   | 1.248 up   |
| PD0459 | 30S ribosomal protein S11                 | 1.200 down | 1.189 down | 1.012 down | 1.427 down | 1.215 down | 1.174 down |
| PD0460 | 30S ribosomal protein S4                  | 1.135 up   | 1.212 down | 1.026 up   | 1.067 down | 1.166 up   | 1.245 down |
| PD0461 | DNA-directed RNA polymerase alpha subunit | 1.007 up   | 1.164 down | 1.037 down | 1.155 down | 1.029 down | 1.122 down |
| PD0462 | 50S ribosomal protein L17                 | 1.136 up   | 1.128 down | 1.044 up   | 1.007 up   | 1.187 up   | 1.178 down |
| PD0463 | hypothetical protein                      | 1.022 up   | 1.106 up   | 1.023 up   | 1.131 up   | 1.045 up   | 1.081 up   |
| PD0464 | competence-related protein                | 1.181 up   | 1.482 down | 1.334 down | 1.254 down | 1.130 down | 1.110 down |
| PD0465 | triacylglycerol lipase                    | 1.004 up   | 1.019 down | 1.023 up   | 1.015 down | 1.027 up   | 1.043 down |
| PD0466 | lipase chaperone                          | 1.016 down | 1.086 down | 1.071 up   | 1.103 down | 1.054 up   | 1.163 down |

|        |                                                    |            |            |            |            |            |            |
|--------|----------------------------------------------------|------------|------------|------------|------------|------------|------------|
| PD0468 | polysaccharide biosynthetic protein                | 1.022 down | 1.165 down | 1.009 up   | 1.191 down | 1.013 down | 1.175 down |
| PD0469 | hypothetical protein                               | 1.012 down | 1.321 down | 1.195 up   | 1.337 down | 1.180 up   | 1.579 down |
| PD0471 | trigger factor                                     | 1.118 up   | 1.104 down | 1.006 up   | 1.013 up   | 1.126 up   | 1.111 down |
| PD0472 | ATP-dependent Clp protease proteolytic subunit     | 1.234 up   | 1.183 up   | 1.078 up   | 1.460 up   | 1.331 up   | 1.097 up   |
| PD0473 | ATP-dependent protease ATP-binding subunit         | 1.088 up   | 1.055 up   | 1.110 up   | 1.147 up   | 1.207 up   | 1.052 down |
| PD0474 | ATP-dependent serine proteinase La                 | 1.435 up   | 1.068 down | 1.183 down | 1.343 up   | 1.212 up   | 1.107 up   |
| PD0475 | histone-like protein                               | 1.268 down | 1.083 down | 1.278 up   | 1.374 down | 1.007 up   | 1.385 down |
| PD0478 | peptidyl-prolyl cis-trans isomerase                | 1.151 down | 1.638 up   | 1.488 up   | 1.423 up   | 1.293 up   | 1.100 up   |
| PD0479 | integral membrane protein                          | 1.100 down | 1.084 up   | 1.150 up   | 1.015 down | 1.045 up   | 1.061 down |
| PD0480 | ribonucleotide-diphosphate reductase alpha subunit | 1.064 down | 1.269 down | 1.065 up   | 1.351 down | 1.000 up   | 1.352 down |
| PD0481 | ribonucleotide-diphosphate reductase beta subunit  | 1.027 up   | 1.074 up   | 1.028 up   | 1.104 up   | 1.057 up   | 1.044 up   |
| PD0482 | flavodoxin                                         | 1.070 down | 1.087 down | 1.147 up   | 1.164 down | 1.072 up   | 1.248 down |
| PD0483 | thioredoxin                                        | 1.401 down | 1.066 down | 1.148 up   | 1.495 down | 1.220 down | 1.225 down |
| PD0484 | ribosomal small subunit pseudouridine synthase     | 1.111 up   | 1.085 up   | 1.024 up   | 1.207 up   | 1.138 up   | 1.060 up   |
| PD0485 | hydrolase                                          | 1.022 up   | 1.137 up   | 1.157 up   | 1.162 up   | 1.182 up   | 1.017 down |
| PD0486 | hypothetical protein                               | 1.048 down | 1.017 up   | 1.183 down | 1.030 down | 1.240 down | 1.204 up   |
| PD0487 | hypothetical protein                               | 1.005 down | 1.146 up   | 1.077 down | 1.139 up   | 1.083 down | 1.234 up   |
| PD0488 | 50S ribosomal protein L28                          | 1.150 down | 1.058 up   | 1.106 up   | 1.087 down | 1.039 down | 1.045 down |
| PD0489 | 50S ribosomal protein L33                          | 1.250 up   | 1.065 down | 1.172 down | 1.174 up   | 1.067 up   | 1.100 up   |
| PD0490 | cardiolipin synthase                               | 1.178 down | 1.100 up   | 1.147 up   | 1.070 down | 1.026 down | 1.042 down |

|        |                                                         |            |            |            |            |            |            |
|--------|---------------------------------------------------------|------------|------------|------------|------------|------------|------------|
| PD0491 | glutathione S-transferase                               | 1.026 down | 1.216 down | 1.163 down | 1.249 down | 1.194 down | 1.045 down |
| PD0492 | malate dehydrogenase                                    | 1.116 up   | 1.400 down | 1.697 down | 1.254 down | 1.520 down | 1.211 up   |
| PD0493 | peptidyl-prolyl cis-trans isomerase                     | 1.102 down | 1.177 down | 1.242 up   | 1.298 down | 1.126 up   | 1.462 down |
| PD0494 | GTP-binding elongation factor protein                   | 1.022 down | 1.093 up   | 1.188 up   | 1.069 up   | 1.161 up   | 1.086 down |
| PD0495 | hypothetical protein                                    | 1.035 up   | 1.183 up   | 1.098 up   | 1.225 up   | 1.137 up   | 1.077 up   |
| PD0496 | colicin V secretion protein                             | 1.102 up   | 1.207 up   | 1.219 up   | 1.331 up   | 1.344 up   | 1.009 down |
| PD0497 | hypothetical protein                                    | 1.017 up   | 1.204 down | 1.075 down | 1.183 down | 1.057 down | 1.119 down |
| PD0498 | hypothetical protein                                    | 1.020 up   | 1.478 down | 1.112 down | 1.448 down | 1.090 down | 1.329 down |
| PD0499 | colicin V secretion ABC transporter ATP-binding protein | 1.048 down | 1.158 up   | 1.241 up   | 1.104 up   | 1.183 up   | 1.071 down |
| PD0500 | ABC transporter permease protein                        | 1.038 down | 1.035 up   | 1.037 down | 1.002 down | 1.077 down | 1.074 up   |
| PD0501 | ABC transporter ATP-binding protein                     | 1.158 up   | 1.148 up   | 1.043 up   | 1.329 up   | 1.208 up   | 1.100 up   |
| PD0502 | PilY1 gene product                                      | 1.044 down | 1.069 down | 1.020 up   | 1.116 down | 1.023 down | 1.091 down |
| PD0503 | hypothetical protein                                    | 1.518 down | 1.192 up   | 1.262 up   | 1.273 down | 1.202 down | 1.059 down |
| PD0504 | hypothetical protein                                    | 1.075 down | 1.194 down | 1.006 up   | 1.285 down | 1.068 down | 1.202 down |
| PD0505 | ATP-dependent helicase                                  | 1.022 down | 1.169 up   | 1.137 up   | 1.143 up   | 1.112 up   | 1.028 up   |
| PD0506 | hypothetical protein                                    | 1.353 down | 1.175 up   | 1.436 up   | 1.151 down | 1.061 up   | 1.221 down |
| PD0507 | pathogenicity protein                                   | 1.129 down | 1.097 down | 1.128 down | 1.239 down | 1.274 down | 1.028 up   |
| PD0508 | pathogenicity protein                                   | 1.020 down | 1.025 down | 1.189 up   | 1.046 down | 1.166 up   | 1.220 down |
| PD0509 | carboxyphosphoenolpyruvate phosphonmutase               | 1.093 down | 1.027 up   | 1.070 down | 1.063 down | 1.171 down | 1.100 up   |
| PD0511 | hypothetical protein                                    | 1.068 up   | 1.471 down | 1.375 down | 1.376 down | 1.286 down | 1.070 down |



|        |                                                |            |            |            |            |            |            |
|--------|------------------------------------------------|------------|------------|------------|------------|------------|------------|
| PD0512 | hypothetical protein                           | 1.132 down | 1.079 down | 1.054 down | 1.222 down | 1.194 down | 1.024 down |
| PD0514 | hypothetical protein                           | 1.001 up   | 1.135 up   | 1.052 down | 1.137 up   | 1.051 down | 1.195 up   |
| PD0515 | hypothetical protein                           | 1.066 down | 1.100 down | 1.141 down | 1.173 down | 1.217 down | 1.037 up   |
| PD0516 | hypothetical protein                           | 1.070 up   | 1.402 down | 1.256 down | 1.310 down | 1.173 down | 1.116 down |
| PD0517 | arginine deaminase                             | 1.164 up   | 1.010 down | 1.084 down | 1.153 up   | 1.074 up   | 1.073 up   |
| PD0518 | hypothetical protein                           | 1.137 down | 1.301 up   | 1.358 up   | 1.143 up   | 1.194 up   | 1.043 down |
| PD0519 | lipase                                         | 1.020 down | 1.155 up   | 1.120 down | 1.132 up   | 1.143 down | 1.294 up   |
| PD0520 | transcriptional regulator AraC family          | 1.029 down | 1.123 up   | 1.140 down | 1.091 up   | 1.175 down | 1.282 up   |
| PD0521 | hypothetical protein                           | 1.038 up   | 1.269 down | 1.154 up   | 1.221 down | 1.199 up   | 1.465 down |
| PD0522 | oligoribonuclease                              | 1.148 up   | 1.058 down | 1.160 up   | 1.085 up   | 1.332 up   | 1.228 down |
| PD0523 | small conductance mechanosensitive ion channel | 1.029 down | 1.308 down | 1.313 down | 1.347 down | 1.352 down | 1.003 up   |
| PD0524 | phosphoenolpyruvate synthase                   | 1.168 down | 1.070 down | 1.001 down | 1.250 down | 1.170 down | 1.068 down |
| PD0525 | hypothetical protein                           | 1.058 up   | 1.084 down | 1.291 down | 1.024 down | 1.220 down | 1.190 up   |
| PD0526 | hypothetical protein                           | 1.090 down | 1.059 down | 1.061 up   | 1.154 down | 1.027 down | 1.124 down |
| PD0527 | 7,8-dihydro-8-oxoguanine-triphosphatase        | 1.089 up   | 1.224 down | 1.127 down | 1.123 down | 1.035 down | 1.085 down |
| PD0528 | hypothetical protein                           | 1.115 up   | 1.151 up   | 1.086 up   | 1.284 up   | 1.212 up   | 1.059 up   |
| PD0529 | cellulose 1,4-beta-cellobiosidase              | 1.131 up   | 1.008 up   | 1.119 up   | 1.141 up   | 1.267 up   | 1.110 down |
| PD0530 | lipoyl synthase                                | 1.048 up   | 1.288 down | 1.256 down | 1.229 down | 1.198 down | 1.025 down |
| PD0531 | lipoyltransferase                              | 1.169 up   | 1.004 up   | 1.060 down | 1.175 up   | 1.103 up   | 1.065 up   |
| PD0532 | hypothetical protein                           | 1.161 up   | 1.135 up   | 1.001 up   | 1.318 up   | 1.162 up   | 1.134 up   |

|        |                                                             |            |            |            |            |            |            |
|--------|-------------------------------------------------------------|------------|------------|------------|------------|------------|------------|
| PD0533 | hypothetical protein                                        | 1.124 up   | 1.170 up   | 1.147 down | 1.315 up   | 1.020 down | 1.342 up   |
| PD0534 | poly(hydroxyalcanoate) granule associated protein           | 1.155 down | 1.024 up   | 1.021 up   | 1.127 down | 1.130 down | 1.002 up   |
| PD0535 | hypothetical protein                                        | 1.144 down | 1.054 up   | 1.075 down | 1.084 down | 1.230 down | 1.134 up   |
| PD0536 | hemolysin                                                   | 1.337 down | 1.412 up   | 1.287 up   | 1.056 up   | 1.038 down | 1.097 up   |
| PD0537 | carboxypeptidase related protein                            | 1.022 down | 1.003 down | 1.308 down | 1.025 down | 1.337 down | 1.304 up   |
| PD0538 | hypothetical protein                                        | 1.016 down | 1.123 down | 1.080 down | 1.142 down | 1.098 down | 1.040 down |
| PD0539 | DNA topoisomerase IV subunit B                              | 1.166 up   | 1.144 up   | 1.202 down | 1.334 up   | 1.031 down | 1.376 up   |
| PD0540 | hypothetical protein                                        | 1.125 up   | 1.000 up   | 1.162 down | 1.126 up   | 1.033 down | 1.163 up   |
| PD0541 | CTP synthetase                                              | 1.035 up   | 1.095 down | 1.141 up   | 1.057 down | 1.181 up   | 1.250 down |
| PD0542 | 2-dehydro-3-deoxyphosphooctonate aldolase                   | 1.230 down | 1.252 up   | 1.075 up   | 1.017 up   | 1.144 down | 1.164 up   |
| PD0543 | phosphopyruvate hydratase                                   | 1.007 down | 1.166 down | 1.159 up   | 1.175 down | 1.150 up   | 1.352 down |
| PD0544 | cell division protein FtsB                                  | 1.001 up   | 1.076 up   | 1.175 down | 1.078 up   | 1.173 down | 1.265 up   |
| PD0545 | 2-C-methyl-D-erythritol 4-phosphate<br>cytidyltransferase   | 1.084 down | 1.032 up   | 1.084 down | 1.050 down | 1.176 down | 1.119 up   |
| PD0546 | 2-C-methyl-D-erythritol 2,4-cyclodiphosphate synthase       | 1.187 up   | 1.034 up   | 1.416 down | 1.229 up   | 1.192 down | 1.465 up   |
| PD0547 | hypothetical protein                                        | 1.071 up   | 1.182 down | 1.209 down | 1.103 down | 1.128 down | 1.022 up   |
| PD0548 | gluconolactonase                                            | 1.052 up   | 1.013 up   | 1.017 down | 1.066 up   | 1.034 up   | 1.031 up   |
| PD0549 | electron transfer flavoprotein ubiquinone<br>oxidoreductase | 1.037 up   | 1.653 down | 1.358 down | 1.594 down | 1.309 down | 1.217 down |
| PD0550 | alkylated DNA repair protein                                | 1.073 up   | 1.013 down | 1.024 up   | 1.059 up   | 1.099 up   | 1.037 down |
| PD0551 | hypothetical protein                                        | 1.182 down | 1.213 down | 1.307 down | 1.434 down | 1.545 down | 1.077 up   |
| PD0552 | ABC transporter permease                                    | 1.246 down | 1.244 down | 1.004 up   | 1.551 down | 1.241 down | 1.249 down |

|        |                                                        |            |            |            |            |            |            |
|--------|--------------------------------------------------------|------------|------------|------------|------------|------------|------------|
| PD0553 | ABC transporter ATP-binding protein                    | 1.004 up   | 1.095 down | 1.088 down | 1.090 down | 1.083 down | 1.006 down |
| PD0554 | ABC transporter permease                               | 1.039 up   | 1.098 down | 1.016 up   | 1.056 down | 1.056 up   | 1.116 down |
| PD0555 | hypothetical protein                                   | 1.040 up   | 1.191 down | 1.183 down | 1.145 down | 1.137 down | 1.006 down |
| PD0556 | hypothetical protein                                   | 1.203 up   | 1.240 up   | 1.795 up   | 1.492 up   | 2.160 up   | 1.447 down |
| PD0557 | rod shape-determining protein                          | 1.117 up   | 1.031 down | 1.062 down | 1.083 up   | 1.052 up   | 1.029 up   |
| PD0558 | rod shape-determining protein                          | 1.154 up   | 1.072 down | 1.123 up   | 1.076 up   | 1.297 up   | 1.205 down |
| PD0559 | rod shape-determining protein                          | 1.147 down | 1.172 up   | 1.233 up   | 1.022 up   | 1.075 up   | 1.051 down |
| PD0560 | penicillin-binding protein 2                           | 1.151 up   | 1.220 up   | 1.046 up   | 1.405 up   | 1.205 up   | 1.165 up   |
| PD0561 | rod shape-determining protein                          | 1.208 down | 1.096 up   | 1.031 up   | 1.102 down | 1.171 down | 1.062 up   |
| PD0562 | S-adenosylmethionine:tRNA ribosyltransferase-isomerase | 1.195 up   | 1.144 down | 1.006 up   | 1.044 up   | 1.203 up   | 1.151 down |
| PD0563 | ATP:GTP 3'-pyrophosphotranferase                       | 1.011 up   | 1.301 up   | 1.384 up   | 1.316 up   | 1.400 up   | 1.063 down |
| PD0564 | hypothetical protein                                   | 1.292 down | 1.049 down | 1.357 up   | 1.355 down | 1.050 up   | 1.423 down |
| PD0565 | hypothetical protein                                   | 1.095 up   | 1.130 up   | 1.054 up   | 1.238 up   | 1.154 up   | 1.071 up   |
| PD0566 | cell division topological specificity factor MinE      | 1.195 down | 1.232 down | 1.115 down | 1.473 down | 1.333 down | 1.104 down |
| PD0567 | septum site-determining protein                        | 1.016 up   | 1.040 up   | 1.109 up   | 1.057 up   | 1.127 up   | 1.065 down |
| PD0568 | septum formation inhibitor                             | 1.037 down | 1.230 down | 1.147 down | 1.276 down | 1.189 down | 1.072 down |
| PD0569 | hypothetical protein                                   | 1.377 down | 1.071 up   | 1.079 up   | 1.285 down | 1.276 down | 1.006 down |
| PD0570 | hypothetical protein                                   | 1.013 up   | 1.005 down | 1.013 down | 1.008 up   | none       | 1.008 up   |
| PD0571 | hypothetical protein                                   | 1.323 down | 1.050 up   | 1.004 down | 1.259 down | 1.329 down | 1.055 up   |
| PD0572 | DNA-3-methyladenine glycosidase                        | 1.019 up   | 1.001 down | 1.012 down | 1.018 up   | 1.007 up   | 1.010 up   |

|        |                                                    |            |            |            |            |            |            |
|--------|----------------------------------------------------|------------|------------|------------|------------|------------|------------|
| PD0573 | hypothetical protein                               | 1.169 down | 1.133 up   | 1.175 up   | 1.032 down | 1.005 up   | 1.037 down |
| PD0574 | cytochrome B561                                    | 1.154 down | 1.148 down | 1.001 up   | 1.325 down | 1.152 down | 1.150 down |
| PD0575 | hypothetical protein                               | 1.210 down | 1.154 up   | 1.008 down | 1.048 down | 1.221 down | 1.164 up   |
| PD0576 | histidine kinase/response regulator hybrid protein | 1.134 down | 1.022 up   | 1.147 down | 1.109 down | 1.300 down | 1.172 up   |
| PD0577 | site-specific DNA-methyltransferase                | 1.105 up   | 1.156 down | 1.139 down | 1.046 down | 1.030 down | 1.014 down |
| PD0578 | hypothetical protein                               | 1.006 up   | 1.172 down | 1.157 down | 1.164 down | 1.149 down | 1.012 down |
| PD0579 | hypothetical protein                               | 1.047 down | 1.386 down | 1.387 down | 1.452 down | 1.453 down | 1.000 up   |
| PD0580 | uroporphyrinogen decarboxylase                     | 1.039 up   | 1.284 down | 1.054 down | 1.235 down | 1.014 down | 1.218 down |
| PD0581 | 3-dehydroquinate synthase                          | 1.142 down | 1.040 down | 1.001 up   | 1.188 down | 1.141 down | 1.041 down |
| PD0582 | shikimate kinase                                   | 1.143 down | 1.211 up   | 1.120 up   | 1.059 up   | 1.020 down | 1.080 up   |
| PD0583 | pyridoxamine 5'-phosphate oxidase                  | 1.309 up   | 1.022 up   | 1.024 down | 1.338 up   | 1.277 up   | 1.047 up   |
| PD0584 | glutaminyl-tRNA synthetase                         | 1.062 down | 1.242 down | 1.344 down | 1.319 down | 1.428 down | 1.082 up   |
| PD0585 | hypothetical protein                               | 1.118 up   | 1.004 down | 1.028 up   | 1.113 up   | 1.149 up   | 1.032 down |
| PD0586 | copper homeostasis protein                         | 1.106 up   | 1.029 up   | 1.324 down | 1.139 up   | 1.197 down | 1.363 up   |
| PD0587 | hypothetical protein                               | 1.121 down | 1.367 down | 1.068 up   | 1.534 down | 1.049 down | 1.461 down |
| PD0588 | ABC transporter sulfate binding protein            | 1.150 up   | 1.242 up   | 1.112 up   | 1.428 up   | 1.279 up   | 1.116 up   |
| PD0589 | ABC transporter sulfate permease                   | 1.024 down | 1.182 up   | 1.147 up   | 1.154 up   | 1.120 up   | 1.030 up   |
| PD0590 | ABC transporter sulfate permease                   | 1.222 up   | 1.057 up   | 1.018 up   | 1.292 up   | 1.244 up   | 1.038 up   |
| PD0591 | sulfate ABC transporter ATP-binding protein        | 1.259 up   | 1.031 up   | 1.351 down | 1.299 up   | 1.072 down | 1.394 up   |
| PD0592 | lipid A biosynthesis lauroyl acyltransferase       | 1.003 down | 1.020 up   | 1.024 up   | 1.016 up   | 1.020 up   | 1.004 down |

|        |                                                 |            |            |            |            |            |            |
|--------|-------------------------------------------------|------------|------------|------------|------------|------------|------------|
| PD0593 | RNA polymerase sigma factor                     | 1.323 down | 1.003 up   | 1.166 up   | 1.318 down | 1.134 down | 1.161 down |
| PD0594 | DNA topoisomerase IV subunit A                  | 1.130 down | 1.296 down | 1.465 down | 1.465 down | 1.656 down | 1.130 up   |
| PD0595 | transcriptional regulator MarR family           | 1.338 up   | 1.143 down | 1.180 down | 1.169 up   | 1.134 up   | 1.031 up   |
| PD0596 | hypothetical protein                            | 1.314 down | 1.228 up   | 1.287 up   | 1.069 down | 1.021 down | 1.047 down |
| PD0597 | biotin biosynthesis protein                     | 1.112 down | 1.086 down | 1.017 down | 1.208 down | 1.131 down | 1.068 down |
| PD0598 | 8-amino-7-oxononanoate synthase                 | 1.241 down | 1.156 up   | 1.115 up   | 1.073 down | 1.112 down | 1.036 up   |
| PD0599 | cytochrome oxidase assembly protein             | 1.318 down | 1.084 up   | 1.129 up   | 1.216 down | 1.167 down | 1.041 down |
| PD0600 | protoheme IX farnesyltransferase                | 1.155 up   | 1.101 down | 1.021 down | 1.049 up   | 1.131 up   | 1.077 down |
| PD0602 | tRNA nucleotidyl transferase                    | 1.086 up   | 1.312 down | 1.178 down | 1.207 down | 1.084 down | 1.113 down |
| PD0603 | soluble lytic murein transglycosylase precursor | 1.089 up   | 1.062 down | 1.092 up   | 1.026 up   | 1.190 up   | 1.160 down |
| PD0604 | phosphatidylserine decarboxylase                | 1.181 down | 1.136 up   | 1.088 down | 1.039 down | 1.285 down | 1.236 up   |
| PD0605 | truncated cytochrome C oxidase                  | 1.026 down | 1.042 down | 1.192 down | 1.069 down | 1.223 down | 1.143 up   |
| PD0606 | adenine-specific methylase                      | 1.063 down | 1.246 down | 1.161 down | 1.325 down | 1.234 down | 1.073 down |
| PD0607 | chorismate synthase                             | 1.068 up   | 1.262 down | 1.071 down | 1.181 down | 1.002 down | 1.178 down |
| PD0608 | aspartate-semialdehyde dehydrogenase            | 1.045 down | 1.154 up   | 1.021 up   | 1.104 up   | 1.023 down | 1.130 up   |
| PD0609 | hypothetical protein                            | 1.013 up   | 1.161 down | 1.053 down | 1.146 down | 1.039 down | 1.102 down |
| PD0610 | tRNA pseudouridine synthase A                   | 1.237 up   | 1.056 up   | 1.246 up   | 1.307 up   | 1.542 up   | 1.179 down |
| PD0611 | N-(5'-phosphoribosyl)anthranilate isomerase     | 1.014 up   | 1.118 up   | 1.111 up   | 1.134 up   | 1.128 up   | 1.005 up   |
| PD0612 | tryptophan synthase subunit beta                | 1.042 down | 1.100 down | 1.066 up   | 1.148 down | 1.022 up   | 1.173 down |
| PD0613 | tryptophan synthase subunit alpha               | 1.031 down | 1.169 down | 1.088 up   | 1.207 down | 1.055 up   | 1.273 down |

|        |                                                                      |            |            |            |            |            |            |
|--------|----------------------------------------------------------------------|------------|------------|------------|------------|------------|------------|
| PD0614 | DNA repair protein                                                   | 1.009 down | 1.137 down | 1.438 down | 1.148 down | 1.452 down | 1.264 up   |
| PD0615 | luciferase                                                           | 1.069 up   | 1.045 down | 1.137 down | 1.023 up   | 1.063 down | 1.088 up   |
| PD0616 | hypothetical protein                                                 | 1.156 down | 1.051 down | 1.027 down | 1.216 down | 1.187 down | 1.023 down |
| PD0617 | ATP-dependent DNA helicase                                           | 1.098 down | 1.279 down | 1.002 up   | 1.406 down | 1.096 down | 1.283 down |
| PD0618 | DNA-binding related protein                                          | 1.013 down | 1.013 up   | 1.179 up   | none       | 1.164 up   | 1.164 down |
| PD0619 | ATP-dependent helicase                                               | 1.173 up   | 1.132 up   | 1.051 up   | 1.328 up   | 1.233 up   | 1.077 up   |
| PD0620 | glycine dehydrogenase                                                | 1.116 down | 1.001 up   | 1.117 up   | 1.114 down | 1.001 up   | 1.116 down |
| PD0621 | cytochrome O ubiquinol oxidase subunit IV                            | 1.061 up   | 1.639 down | 1.335 down | 1.544 down | 1.257 down | 1.228 down |
| PD0622 | cytochrome O ubiquinol oxidase subunit III                           | 1.061 up   | 1.188 down | 1.274 down | 1.119 down | 1.201 down | 1.072 up   |
| PD0623 | cytochrome O ubiquinol oxidase subunit I                             | 1.098 down | 1.124 down | 1.003 up   | 1.236 down | 1.094 down | 1.129 down |
| PD0624 | cytochrome O ubiquinol oxidase subunit II                            | 1.022 down | 1.135 down | 1.205 down | 1.161 down | 1.233 down | 1.062 up   |
| PD0625 | octaprenyl-diphosphate synthase                                      | 1.012 up   | 1.588 down | 1.299 down | 1.569 down | 1.283 down | 1.222 down |
| PD0626 | single-strand DNA-binding protein                                    | 1.034 down | 1.005 up   | 1.203 down | 1.028 down | 1.244 down | 1.210 up   |
| PD0627 | 2-polyprenyl-3-methyl-5-hydroxy-6-methoxy-1, 4-benzoquinol methylase | 1.156 up   | 1.003 down | 1.094 down | 1.152 up   | 1.057 up   | 1.090 up   |
| PD0628 | Na <sup>+</sup> /H <sup>+</sup> exchange protein                     | 1.046 down | 1.051 up   | 1.045 up   | 1.004 up   | 1.001 down | 1.005 up   |
| PD0629 | lactoylglutathione lyase                                             | 1.236 down | 1.206 up   | 1.141 up   | 1.024 down | 1.082 down | 1.056 up   |
| PD0631 | phosphotransferase system enzyme I                                   | 1.242 down | 1.059 down | 1.133 up   | 1.315 down | 1.095 down | 1.200 down |
| PD0632 | phosphotransferase system HPr enzyme                                 | 1.632 up   | 1.281 down | 1.558 down | 1.273 up   | 1.047 up   | 1.216 up   |
| PD0633 | sugar transport protein                                              | 1.125 down | 1.197 up   | 1.393 up   | 1.064 up   | 1.238 up   | 1.163 down |
| PD0634 | hypothetical protein                                                 | 1.128 down | 1.210 down | 1.177 down | 1.366 down | 1.329 down | 1.028 down |

|        |                                                                                               |            |            |            |            |            |            |
|--------|-----------------------------------------------------------------------------------------------|------------|------------|------------|------------|------------|------------|
| PD0635 | HPr kinase/phosphorylase                                                                      | 1.208 up   | 1.152 down | 1.084 down | 1.049 up   | 1.114 up   | 1.061 down |
| PD0636 | sigma-54 modulation protein                                                                   | 1.092 down | 1.004 up   | 1.066 up   | 1.087 down | 1.024 down | 1.061 down |
| PD0637 | DNA-directed RNA polymerase subunit N                                                         | 1.036 down | 1.038 down | 1.038 down | 1.076 down | 1.076 down | none       |
| PD0638 | ABC transporter ATP-binding protein                                                           | 1.134 down | 1.092 down | 1.005 up   | 1.240 down | 1.129 down | 1.098 down |
| PD0639 | hypothetical protein                                                                          | 1.293 down | 1.011 down | 1.015 down | 1.308 down | 1.313 down | 1.003 up   |
| PD0640 | hypothetical protein                                                                          | 1.236 down | 1.175 up   | 1.014 down | 1.051 down | 1.254 down | 1.192 up   |
| PD0641 | hypothetical protein                                                                          | 1.144 down | 1.484 down | 1.413 down | 1.699 down | 1.617 down | 1.050 down |
| PD0642 | polysialic acid capsule expression protein                                                    | 1.123 up   | 1.427 down | 1.178 down | 1.270 down | 1.048 down | 1.211 down |
| PD0643 | hypothetical protein                                                                          | 1.297 up   | 1.089 up   | 1.072 up   | 1.412 up   | 1.391 up   | 1.015 up   |
| PD0644 | UDP-N-acetylglucosamine 1-carboxyvinyltransferase                                             | 1.032 down | 1.344 up   | 1.264 up   | 1.301 up   | 1.224 up   | 1.063 up   |
| PD0645 | hypothetical protein                                                                          | 1.200 up   | 1.044 down | 1.067 up   | 1.149 up   | 1.281 up   | 1.114 down |
| PD0646 | hypothetical protein                                                                          | 1.003 up   | 1.087 down | 1.203 down | 1.083 down | 1.199 down | 1.106 up   |
| PD0647 | UDP-3-O-[3-hydroxymyristoyl] glucosamine N-acyltransferase                                    | 1.084 up   | 1.046 up   | 1.050 up   | 1.135 up   | 1.139 up   | 1.003 down |
| PD0648 | hypothetical protein                                                                          | 1.039 up   | 1.074 up   | 1.096 up   | 1.116 up   | 1.139 up   | 1.020 down |
| PD0649 | hypothetical protein                                                                          | 1.084 down | 1.429 down | 1.080 down | 1.550 down | 1.172 down | 1.323 down |
| PD0650 | phosphoribosylformylglycinamide synthase                                                      | 1.290 down | 1.161 up   | 1.268 up   | 1.110 down | 1.017 down | 1.092 down |
| PD0651 | disulfide isomerase                                                                           | 1.060 up   | 1.114 down | 1.224 down | 1.050 down | 1.154 down | 1.098 up   |
| PD0652 | tyrosine recombinase                                                                          | 1.095 down | 1.185 down | 1.145 down | 1.298 down | 1.255 down | 1.034 down |
| PD0653 | ion transporter 33.9 kDa                                                                      | 1.138 down | 1.003 down | 1.023 up   | 1.142 down | 1.112 down | 1.026 down |
| PD0654 | bifunctional N-succinyldiaminopimelate-aminotransferase/ acetylornithine transaminase protein | 1.038 up   | 1.108 up   | 1.093 up   | 1.151 up   | 1.135 up   | 1.013 up   |

|        |                                                              |            |            |            |            |            |            |
|--------|--------------------------------------------------------------|------------|------------|------------|------------|------------|------------|
| PD0655 | glutamate-cysteine ligase precursor                          | 1.084 down | 1.171 up   | 1.009 up   | 1.080 up   | 1.073 down | 1.160 up   |
| PD0656 | GTP-binding protein                                          | 1.004 up   | 1.069 down | 1.089 up   | 1.064 down | 1.094 up   | 1.165 down |
| PD0657 | hypothetical protein                                         | 1.117 up   | 1.101 down | 1.239 down | 1.014 up   | 1.109 down | 1.126 up   |
| PD0658 | thiol:disulfide interchange protein                          | 1.065 up   | 1.072 up   | 1.072 down | 1.142 up   | 1.006 down | 1.149 up   |
| PD0659 | thiol:disulfide interchange protein                          | 1.182 up   | 1.019 down | 1.268 down | 1.159 up   | 1.072 down | 1.243 up   |
| PD0660 | hypothetical protein                                         | 1.010 down | 1.401 down | 1.284 down | 1.415 down | 1.297 down | 1.091 down |
| PD0661 | hypothetical protein                                         | 1.025 up   | 1.177 up   | 1.052 up   | 1.208 up   | 1.079 up   | 1.119 up   |
| PD0662 | tRNA (5-methylaminomethyl-2-thiouridylate)-methyltransferase | 1.029 up   | 1.057 down | 1.078 down | 1.027 down | 1.047 down | 1.019 up   |
| PD0663 | dNTP pyrophosphohydrolase                                    | 1.123 up   | 1.182 down | 1.418 down | 1.052 down | 1.262 down | 1.199 up   |
| PD0664 | ATP-dependent Clp protease adaptor protein ClpS              | 1.180 down | 1.040 down | 1.039 up   | 1.227 down | 1.135 down | 1.081 down |
| PD0665 | ATP-dependent Clp protease subunit                           | 1.017 down | 1.469 up   | 1.090 up   | 1.443 up   | 1.071 up   | 1.347 up   |
| PD0666 | translation initiation factor IF-1                           | 1.439 up   | 1.763 down | 1.881 down | 1.225 down | 1.307 down | 1.066 up   |
| PD0667 | leucyl/phenylalanyl-tRNA--protein transferase                | 1.017 down | 1.031 down | 1.475 down | 1.049 down | 1.500 down | 1.429 up   |
| PD0668 | hypothetical protein                                         | 1.142 down | 1.067 down | 1.006 down | 1.219 down | 1.149 down | 1.060 down |
| PD0669 | thioredoxin reductase                                        | 1.122 up   | 1.246 down | 1.231 down | 1.110 down | 1.096 down | 1.012 down |
| PD0670 | cell division protein                                        | 1.107 up   | 1.040 up   | 1.246 down | 1.151 up   | 1.125 down | 1.296 up   |
| PD0671 | hypothetical protein                                         | 1.165 up   | 1.028 down | 1.152 down | 1.132 up   | 1.011 up   | 1.120 up   |
| PD0672 | outer-membrane lipoprotein carrier protein precursor         | 1.030 down | 1.138 up   | 1.008 down | 1.105 up   | 1.039 down | 1.149 up   |
| PD0673 | ATPase                                                       | 1.032 down | 1.124 up   | 1.081 up   | 1.088 up   | 1.047 up   | 1.039 up   |
| PD0674 | transmembrane protein                                        | 1.614 up   | 1.478 down | 1.114 down | 1.092 up   | 1.448 up   | 1.326 down |



|        |                                                                                     |            |            |            |            |            |            |
|--------|-------------------------------------------------------------------------------------|------------|------------|------------|------------|------------|------------|
| PD0675 | histidine kinase/response regulator hybrid protein                                  | 1.149 down | 1.304 up   | 1.078 down | 1.134 up   | 1.240 down | 1.407 up   |
| PD0676 | 2-amino-4-hydroxy-6- hydroxymethyl-dihydropteridine pyrophosphokinase               | 1.236 up   | 1.186 down | 1.047 down | 1.042 up   | 1.180 up   | 1.132 down |
| PD0677 | pteridine reductase                                                                 | 1.043 down | 1.244 down | 1.153 down | 1.298 down | 1.203 down | 1.078 down |
| PD0678 | hypothetical protein                                                                | 1.039 up   | 1.006 down | 1.223 up   | 1.032 up   | 1.272 up   | 1.232 down |
| PD0679 | hypothetical protein                                                                | 1.416 up   | 1.172 down | 1.043 down | 1.207 up   | 1.357 up   | 1.124 down |
| PD0680 | glucose kinase                                                                      | 1.034 up   | 1.269 down | 1.003 down | 1.227 down | 1.030 up   | 1.266 down |
| PD0681 | glucose/galactose transporter                                                       | 1.164 up   | 1.255 down | 1.036 down | 1.078 down | 1.122 up   | 1.210 down |
| PD0682 | transcriptional regulator LacI family                                               | 1.006 up   | 1.111 down | 1.085 down | 1.104 down | 1.079 down | 1.023 down |
| PD0683 | glucosamine--fructose-6-phosphate aminotransferase                                  | 1.023 down | 1.037 up   | 1.250 down | 1.013 up   | 1.279 down | 1.296 up   |
| PD0684 | N-acetylglucosamine-6-phosphate deacetylase                                         | 1.057 up   | 1.068 up   | 1.219 up   | 1.129 up   | 1.289 up   | 1.141 down |
| PD0685 | acetyl-CoA carboxylase beta subunit                                                 | 1.151 up   | 1.022 up   | 1.015 down | 1.176 up   | 1.133 up   | 1.038 up   |
| PD0686 | phosphomannomutase                                                                  | 1.203 down | 1.093 up   | 1.033 up   | 1.101 down | 1.164 down | 1.057 up   |
| PD0687 | Shf protein                                                                         | 1.134 down | 1.085 down | 1.433 down | 1.230 down | 1.625 down | 1.320 up   |
| PD0688 | UDP-N-acetylglucosamine--N-acetylmuramyl-(pentapeptide) pyrophosphoryl-undecaprenol | 1.130 down | 1.108 down | 1.003 down | 1.252 down | 1.134 down | 1.104 down |
| PD0689 | benzene 1,2-dioxygenase, ferredoxin protein                                         | 1.206 down | 1.236 down | 1.249 down | 1.492 down | 1.508 down | 1.010 up   |
| PD0690 | selenocysteine lyase                                                                | 1.086 down | 1.405 down | 1.157 down | 1.526 down | 1.257 down | 1.214 down |
| PD0691 | ABC transporter membrane protein                                                    | 1.037 down | 1.194 down | 1.122 down | 1.239 down | 1.163 down | 1.064 down |
| PD0692 | ABC transporter ATP-binding protein                                                 | 1.124 up   | 1.608 down | 1.419 down | 1.430 down | 1.261 down | 1.133 down |
| PD0693 | ABC transporter membrane protein                                                    | 1.208 down | 1.005 up   | 1.121 down | 1.201 down | 1.354 down | 1.127 up   |

|        |                                                       |            |            |            |            |            |            |
|--------|-------------------------------------------------------|------------|------------|------------|------------|------------|------------|
| PD0694 | hypothetical protein                                  | 1.264 up   | 1.154 down | 1.223 down | 1.095 up   | 1.034 up   | 1.059 up   |
| PD0695 | hypothetical protein                                  | 1.242 down | 1.280 up   | 1.384 up   | 1.030 up   | 1.113 up   | 1.081 down |
| PD0696 | dipeptidyl aminopeptidase                             | 1.047 down | 1.072 up   | 1.172 up   | 1.024 up   | 1.119 up   | 1.092 down |
| PD0697 | hypothetical protein                                  | 1.304 down | 1.206 down | 1.033 down | 1.574 down | 1.347 down | 1.168 down |
| PD0698 | diaminopimelate epimerase                             | 1.110 up   | 1.066 down | 1.017 down | 1.041 up   | 1.092 up   | 1.048 down |
| PD0699 | hypothetical protein                                  | 1.170 down | 1.022 down | 1.161 down | 1.197 down | 1.359 down | 1.135 up   |
| PD0700 | tyrosine recombinase                                  | 1.021 up   | 1.005 down | 1.075 up   | 1.015 up   | 1.098 up   | 1.081 down |
| PD0701 | ATP-dependent protease peptidase subunit              | 1.043 up   | 1.315 down | 1.220 down | 1.260 down | 1.169 down | 1.077 down |
| PD0704 | ubiquinone/menaquinone biosynthesis methyltransferase | 1.089 down | 1.087 down | 1.048 up   | 1.184 down | 1.038 down | 1.140 down |
| PD0705 | aminopeptidase N                                      | 1.006 down | 1.022 down | 1.134 down | 1.028 down | 1.141 down | 1.110 up   |
| PD0706 | hypothetical protein                                  | 1.199 up   | 1.075 down | 1.035 down | 1.114 up   | 1.158 up   | 1.039 down |
| PD0707 | transcriptional regulator MarR/EmrR family            | 1.063 up   | 1.001 down | 1.032 up   | 1.061 up   | 1.097 up   | 1.033 down |
| PD0708 | virulence regulator                                   | 1.112 up   | 1.015 up   | 1.047 down | 1.129 up   | 1.061 up   | 1.063 up   |
| PD0709 | hypothetical protein                                  | 1.272 down | 1.067 up   | 1.064 down | 1.191 down | 1.354 down | 1.136 up   |
| PD0710 | hypothetical protein                                  | 1.087 up   | 1.193 down | 1.074 down | 1.098 down | 1.011 up   | 1.111 down |
| PD0711 | TonB-dependent receptor                               | 1.235 up   | 1.073 down | 1.033 up   | 1.150 up   | 1.276 up   | 1.109 down |
| PD0712 | transposase                                           | 1.002 up   | 1.386 down | 1.203 down | 1.383 down | 1.201 down | 1.151 down |
| PD0713 | hypothetical protein                                  | 1.180 up   | 1.146 down | 1.138 down | 1.029 up   | 1.036 up   | 1.007 down |
| PD0714 | phosphoadenosine phosphosulfate reductase             | 1.156 down | 1.274 down | 1.232 down | 1.473 down | 1.425 down | 1.034 down |
| PD0715 | NADPH-sulfite reductase iron-sulfur protein           | 1.020 up   | 1.160 down | 1.206 down | 1.137 down | 1.182 down | 1.039 up   |

|        |                                                                                    |            |            |            |            |            |            |
|--------|------------------------------------------------------------------------------------|------------|------------|------------|------------|------------|------------|
| PD0716 | NADPH-sulfite reductase flavoprotein subunit                                       | 1.148 down | 1.177 up   | 1.204 up   | 1.024 up   | 1.048 up   | 1.023 down |
| PD0717 | sulfate adenylyltransferase subunit 2                                              | 1.006 down | 1.009 down | 1.027 down | 1.016 down | 1.033 down | 1.017 up   |
| PD0718 | binfunctional sulfate adenylyltransferase subunit 1/adenylylsulfate kinase protein | 1.154 down | 1.118 up   | 1.185 up   | 1.031 down | 1.026 up   | 1.059 down |
| PD0719 | DNA-directed RNA polymerase omega subunit                                          | 1.071 up   | 1.073 up   | 1.004 down | 1.150 up   | 1.066 up   | 1.078 up   |
| PD0720 | guanylate kinase                                                                   | 1.067 up   | 1.043 down | 1.035 up   | 1.023 up   | 1.104 up   | 1.079 down |
| PD0721 | alpha helix protein                                                                | 1.013 down | 1.092 up   | 1.018 up   | 1.077 up   | 1.004 up   | 1.071 up   |
| PD0722 | ribonuclease PH                                                                    | none       | 1.132 down | 1.049 down | 1.132 down | 1.049 down | 1.079 down |
| PD0723 | putative deoxyribonucleotide triphosphate pyrophosphatase                          | 1.006 down | 1.160 up   | 1.132 up   | 1.152 up   | 1.124 up   | 1.024 up   |
| PD0724 | coproporphyrinogen III oxidase                                                     | 1.056 down | 1.184 up   | 1.005 down | 1.121 up   | 1.062 down | 1.191 up   |
| PD0725 | hypothetical protein                                                               | 1.052 up   | 1.310 down | 1.263 down | 1.244 down | 1.200 down | 1.036 down |
| PD0726 | hypothetical protein                                                               | 1.066 down | 1.297 down | 1.017 up   | 1.384 down | 1.048 down | 1.320 down |
| PD0727 | proline imino-peptidase                                                            | 1.005 up   | 1.109 down | 1.083 up   | 1.103 down | 1.089 up   | 1.201 down |
| PD0728 | protoporphyrinogen oxidase                                                         | 1.125 up   | 1.080 down | 1.133 down | 1.042 up   | 1.006 down | 1.048 up   |
| PD0729 | hypothetical protein                                                               | 1.012 down | 1.031 up   | 1.017 down | 1.019 up   | 1.030 down | 1.049 up   |
| PD0730 | hypothetical protein                                                               | 1.118 up   | 1.256 down | 1.012 up   | 1.123 down | 1.132 up   | 1.272 down |
| PD0731 | outer membrane protein XadA                                                        | 1.074 up   | 1.091 down | 1.035 up   | 1.015 down | 1.113 up   | 1.130 down |
| PD0732 | general secretory pathway protein E                                                | 1.131 up   | 1.147 down | 1.083 up   | 1.014 down | 1.225 up   | 1.242 down |
| PD0733 | general secretory pathway protein F                                                | 1.123 down | 1.018 up   | 1.014 up   | 1.102 down | 1.106 down | 1.003 up   |
| PD0734 | general secretory pathway protein G precursor                                      | 1.068 up   | 1.163 down | 1.004 up   | 1.088 down | 1.073 up   | 1.168 down |
| PD0735 | general secretory pathway protein H precursor                                      | 1.310 up   | 1.157 down | 1.254 down | 1.132 up   | 1.044 up   | 1.083 up   |

|        |                                               |            |            |            |            |            |            |
|--------|-----------------------------------------------|------------|------------|------------|------------|------------|------------|
| PD0736 | general secretory pathway protein I precursor | 1.015 down | 1.082 down | 1.049 down | 1.098 down | 1.065 down | 1.031 down |
| PD0737 | hypothetical protein                          | 1.258 up   | 1.170 down | 1.113 down | 1.075 up   | 1.130 up   | 1.051 down |
| PD0738 | general secretory pathway protein K           | 1.217 down | 1.295 up   | 1.394 up   | 1.063 up   | 1.145 up   | 1.076 down |
| PD0739 | general secretory pathway protein L           | 1.152 up   | 1.420 down | 1.027 down | 1.232 down | 1.121 up   | 1.381 down |
| PD0740 | general secretion pathway protein             | 1.374 up   | 1.493 down | 1.063 up   | 1.086 down | 1.462 up   | 1.588 down |
| PD0741 | XpsN protein                                  | 1.007 down | 1.204 down | 1.177 up   | 1.212 down | 1.168 up   | 1.417 down |
| PD0742 | general secretory pathway protein D precursor | 1.170 up   | 1.100 down | 1.028 up   | 1.064 up   | 1.204 up   | 1.131 down |
| PD0743 | hypothetical protein                          | 1.076 up   | 1.052 down | 1.093 up   | 1.023 up   | 1.176 up   | 1.150 down |
| PD0744 | surface protein                               | 1.148 up   | 1.034 down | 1.132 up   | 1.110 up   | 1.300 up   | 1.171 down |
| PD0745 | subunit C of alkyl hydroperoxide reductase    | 1.240 up   | 1.169 down | 1.074 up   | 1.060 up   | 1.332 up   | 1.256 down |
| PD0746 | subunit F of alkyl hydroperoxide reductase    | 1.019 down | 1.259 up   | 1.195 up   | 1.235 up   | 1.172 up   | 1.053 up   |
| PD0747 | oxidative stress transcriptional regulator    | 1.082 down | 1.076 up   | 1.115 up   | 1.005 down | 1.030 up   | 1.036 down |
| PD0748 | hypothetical protein                          | 1.150 up   | 1.041 down | 1.021 up   | 1.105 up   | 1.174 up   | 1.063 down |
| PD0749 | 50S ribosomal protein L31                     | 1.067 down | 1.109 down | 1.007 up   | 1.184 down | 1.059 down | 1.117 down |
| PD0750 | citrate synthase                              | 1.515 up   | 1.728 down | 1.754 down | 1.140 down | 1.157 down | 1.014 up   |
| PD0751 | 30S ribosomal protein S9                      | none       | 1.083 up   | 1.181 up   | 1.082 up   | 1.181 up   | 1.090 down |
| PD0752 | 50S ribosomal protein L13                     | 1.128 up   | 1.023 down | 1.032 down | 1.102 up   | 1.093 up   | 1.008 up   |
| PD0753 | ubiquinone biosynthesis protein               | 1.239 up   | 1.363 down | 1.252 down | 1.100 down | 1.010 down | 1.088 down |
| PD0754 | S-adenosylmethionine decarboxylase proenzyme  | 1.043 up   | 1.064 down | 1.171 down | 1.020 down | 1.122 down | 1.100 up   |
| PD0755 | cAMP-regulatory protein                       | 1.046 down | 1.332 up   | 1.123 down | 1.273 up   | 1.175 down | 1.496 up   |

|        |                                                               |            |            |            |            |            |            |
|--------|---------------------------------------------------------------|------------|------------|------------|------------|------------|------------|
| PD0756 | molybdopterin biosynthesis protein                            | 1.039 down | 1.089 up   | 1.168 down | 1.047 up   | 1.215 down | 1.273 up   |
| PD0757 | peptidoglycan-associated outer membrane lipoprotein precursor | 1.051 up   | 1.493 down | 1.080 down | 1.420 down | 1.027 down | 1.381 down |
| PD0758 | dihydrolipoamide dehydrogenase                                | 1.176 down | 1.006 down | 1.390 up   | 1.184 down | 1.181 up   | 1.399 down |
| PD0759 | dihydrolipoamide acetyltransferase                            | 1.095 up   | 1.735 down | 1.182 down | 1.584 down | 1.080 down | 1.467 down |
| PD0760 | oxoglutarate dehydrogenase                                    | 1.013 up   | 1.194 down | 1.026 up   | 1.178 down | 1.040 up   | 1.226 down |
| PD0761 | hypothetical protein                                          | 1.007 up   | 1.134 down | 1.006 up   | 1.126 down | 1.013 up   | 1.141 down |
| PD0762 | adenylosuccinate lyase                                        | 1.124 up   | 1.166 up   | 1.261 down | 1.311 up   | 1.121 down | 1.471 up   |
| PD0763 | fumarate hydratase                                            | 1.052 up   | 1.089 up   | 1.058 down | 1.146 up   | 1.005 down | 1.153 up   |
| PD0764 | phage-related integrase                                       | 1.106 down | 1.412 up   | 1.147 up   | 1.276 up   | 1.037 up   | 1.230 up   |
| PD0765 | hypothetical protein                                          | 1.190 down | 1.138 down | 1.156 down | 1.354 down | 1.376 down | 1.016 up   |
| PD0766 | hypothetical protein                                          | 1.103 up   | 1.023 down | 1.062 up   | 1.077 up   | 1.172 up   | 1.087 down |
| PD0767 | hypothetical protein                                          | 1.050 up   | 1.253 down | 1.138 down | 1.192 down | 1.083 down | 1.100 down |
| PD0768 | hypothetical protein                                          | 1.100 up   | 1.017 down | 1.003 down | 1.081 up   | 1.097 up   | 1.014 down |
| PD0769 | hypothetical protein                                          | 1.166 up   | 1.037 up   | 1.150 down | 1.209 up   | 1.013 up   | 1.193 up   |
| PD0770 | hypothetical protein                                          | 1.003 up   | 1.063 down | 1.024 down | 1.060 down | 1.020 down | 1.038 down |
| PD0772 | hypothetical protein                                          | 1.027 down | 1.062 up   | 1.101 up   | 1.033 up   | 1.072 up   | 1.037 down |
| PD0773 | glucose-inhibited division protein A                          | 1.032 up   | 1.208 down | 1.183 down | 1.169 down | 1.145 down | 1.021 down |
| PD0774 | hypothetical protein                                          | 1.201 down | 1.511 down | 1.165 down | 1.816 down | 1.399 down | 1.297 down |
| PD0775 | hypothetical protein                                          | 1.051 down | 1.215 down | 1.063 down | 1.278 down | 1.118 down | 1.143 down |
| PD0776 | hypothetical protein                                          | 1.126 up   | 1.265 down | 1.247 down | 1.123 down | 1.107 down | 1.014 down |

|        |                                            |            |            |            |            |            |            |
|--------|--------------------------------------------|------------|------------|------------|------------|------------|------------|
| PD0777 | aspartyl/asparaginy beta-hydroxylase       | 1.264 down | 1.135 down | 1.117 up   | 1.435 down | 1.131 down | 1.268 down |
| PD0778 | biotin synthesis protein                   | 1.033 down | 1.500 down | 1.350 down | 1.551 down | 1.396 down | 1.110 down |
| PD0779 | hypothetical protein                       | 1.115 up   | 1.099 down | 1.079 up   | 1.014 up   | 1.204 up   | 1.187 down |
| PD0780 | hypothetical protein                       | 1.171 down | 1.042 down | 1.015 down | 1.221 down | 1.189 down | 1.026 down |
| PD0781 | hypothetical protein                       | 1.210 up   | 1.117 down | 1.080 down | 1.082 up   | 1.120 up   | 1.034 down |
| PD0782 | carbonic anhydrase                         | 1.094 up   | 1.084 down | 1.009 down | 1.009 up   | 1.084 up   | 1.074 down |
| PD0783 | multidrug-efflux transporter               | 1.030 down | 1.138 down | 1.185 down | 1.172 down | 1.220 down | 1.041 up   |
| PD0784 | precursor of drug resistance protein       | 1.039 down | 1.283 down | 1.083 down | 1.334 down | 1.126 down | 1.184 down |
| PD0785 | NAD-glutamate dehydrogenase                | 1.208 up   | 1.111 down | 1.404 down | 1.087 up   | 1.162 down | 1.264 up   |
| PD0786 | inorganic polyphosphate/ATP-NAD kinase     | 1.068 up   | 1.061 up   | 1.048 down | 1.134 up   | 1.019 up   | 1.112 up   |
| PD0787 | 5'-nucleotidase                            | 1.359 up   | 1.473 down | 1.403 down | 1.083 down | 1.032 down | 1.050 down |
| PD0788 | hypothetical protein                       | 1.223 down | 1.426 down | 1.055 down | 1.744 down | 1.290 down | 1.351 down |
| PD0789 | resolvase/integrase-like protein           | 1.065 up   | 1.053 up   | 1.108 up   | 1.123 up   | 1.181 up   | 1.051 down |
| PD0790 | DNA primase                                | 1.382 up   | 3.630 up   | 1.512 up   | 5.020 up   | 2.091 up   | 2.400 up   |
| PD0791 | hypothetical protein                       | 1.050 up   | 1.003 down | 1.105 down | 1.046 up   | 1.052 down | 1.101 up   |
| PD0792 | hypothetical protein                       | 1.034 down | 1.185 down | 1.093 up   | 1.226 down | 1.056 up   | 1.296 down |
| PD0793 | exodeoxyribonuclease I                     | 1.369 down | 1.132 up   | 1.243 up   | 1.209 down | 1.101 down | 1.098 down |
| PD0794 | hypothetical protein                       | 1.195 down | 1.055 up   | 1.334 up   | 1.133 down | 1.116 up   | 1.264 down |
| PD0795 | Na <sup>+</sup> :H <sup>+</sup> antiporter | 1.263 up   | 1.126 down | 1.142 up   | 1.121 up   | 1.442 up   | 1.286 down |
| PD0796 | hypothetical protein                       | 1.318 up   | 1.131 up   | 1.144 down | 1.492 up   | 1.152 up   | 1.295 up   |

|        |                                            |            |            |            |            |            |            |
|--------|--------------------------------------------|------------|------------|------------|------------|------------|------------|
| PD0797 | ribose-5-phosphate isomerase A             | 1.102 up   | 1.061 up   | 1.030 up   | 1.169 up   | 1.135 up   | 1.029 up   |
| PD0798 | hypothetical protein                       | 1.164 down | 1.132 down | 1.055 down | 1.319 down | 1.229 down | 1.072 down |
| PD0799 | hypothetical protein                       | 1.047 up   | 1.420 down | 1.435 down | 1.355 down | 1.369 down | 1.010 up   |
| PD0800 | hypothetical protein                       | 1.077 down | 1.223 up   | 1.018 up   | 1.135 up   | 1.057 down | 1.201 up   |
| PD0801 | hypothetical protein                       | 1.270 up   | 1.049 down | 1.103 down | 1.209 up   | 1.151 up   | 1.050 up   |
| PD0802 | hypothetical protein                       | 1.211 up   | 1.221 down | 1.013 up   | 1.008 down | 1.227 up   | 1.237 down |
| PD0803 | aminopeptidase P                           | 1.107 up   | 1.100 up   | 1.117 up   | 1.218 up   | 1.237 up   | 1.015 down |
| PD0804 | hypothetical protein                       | 1.238 down | 1.057 down | 1.285 down | 1.309 down | 1.592 down | 1.216 up   |
| PD0805 | hypothetical protein                       | 1.009 down | 1.194 down | 1.140 up   | 1.205 down | 1.129 up   | 1.361 down |
| PD0806 | hypothetical protein                       | 1.042 down | 1.009 up   | 1.055 down | 1.032 down | 1.099 down | 1.064 up   |
| PD0807 | hypothetical protein                       | 1.232 down | 1.040 up   | 1.178 up   | 1.184 down | 1.045 down | 1.133 down |
| PD0808 | hypothetical protein                       | 1.197 down | 1.017 up   | 1.069 up   | 1.177 down | 1.119 down | 1.051 down |
| PD0809 | hypothetical protein                       | 1.133 up   | 1.322 down | 1.262 down | 1.166 down | 1.113 down | 1.047 down |
| PD0810 | branched-chain amino acid aminotransferase | 1.189 down | 1.038 down | 1.008 down | 1.235 down | 1.200 down | 1.029 down |
| PD0811 | DNA-binding protein Fis                    | 1.078 down | 1.004 up   | 1.235 down | 1.073 down | 1.331 down | 1.240 up   |
| PD0812 | hypothetical protein                       | 1.219 down | 1.810 down | 1.321 down | 2.206 down | 1.610 down | 1.370 down |
| PD0813 | transcriptional regulator PbsX family      | 1.056 down | 1.044 down | 1.204 up   | 1.103 down | 1.140 up   | 1.258 down |
| PD0814 | hypothetical protein                       | 1.268 down | 1.197 up   | 1.248 up   | 1.059 down | 1.016 down | 1.042 down |
| PD0815 | beta 1,4 glucosyltransferase               | 1.102 up   | 1.213 down | 1.052 down | 1.100 down | 1.047 up   | 1.153 down |
| PD0816 | hypothetical protein                       | 1.134 up   | 1.114 down | 1.084 up   | 1.017 up   | 1.229 up   | 1.208 down |

|        |                                                                                          |            |            |            |            |            |            |
|--------|------------------------------------------------------------------------------------------|------------|------------|------------|------------|------------|------------|
| PD0817 | GTP cyclohydrolase                                                                       | 1.064 down | 1.204 down | 1.106 up   | 1.282 down | 1.039 up   | 1.332 down |
| PD0818 | thioredoxin                                                                              | 1.026 up   | 1.099 up   | 1.076 down | 1.129 up   | 1.047 down | 1.183 up   |
| PD0819 | hypothetical protein                                                                     | 1.098 up   | 1.073 up   | 1.057 down | 1.178 up   | 1.038 up   | 1.134 up   |
| PD0820 | truncated ribonuclease R                                                                 | 1.055 up   | 1.167 up   | 1.027 up   | 1.232 up   | 1.084 up   | 1.137 up   |
| PD0821 | tRNA/rRNA methyltransferase                                                              | 1.053 up   | 1.044 down | 1.013 up   | 1.009 up   | 1.067 up   | 1.058 down |
| PD0822 | transferase                                                                              | none       | 1.068 down | 1.403 down | 1.068 down | 1.403 down | 1.313 up   |
| PD0823 | GTP cyclohydrolase I                                                                     | 1.271 up   | 1.214 down | 1.008 up   | 1.047 up   | 1.282 up   | 1.224 down |
| PD0824 | surface protein                                                                          | 1.044 down | 1.114 up   | 1.252 up   | 1.066 up   | 1.198 up   | 1.124 down |
| PD0825 | transmembrane protein                                                                    | 1.176 up   | 1.041 up   | 1.264 up   | 1.224 up   | 1.487 up   | 1.215 down |
| PD0826 | hypothetical protein                                                                     | 1.098 up   | 1.014 down | 1.004 down | 1.082 up   | 1.093 up   | 1.010 down |
| PD0827 | phosphoribosylamine--glycine ligase                                                      | 1.005 up   | 1.415 down | 1.182 down | 1.407 down | 1.175 down | 1.197 down |
| PD0828 | bifunctionalphosphoribosylaminoimidazolecarboxamide formyltransferase/IMP cyclohydrolase | 1.268 down | 1.098 down | 1.162 down | 1.392 down | 1.474 down | 1.058 up   |
| PD0829 | hypothetical protein                                                                     | 1.024 up   | 1.110 down | 1.260 up   | 1.083 down | 1.291 up   | 1.399 down |
| PD0830 | tRNA/rRNA methylase                                                                      | 1.199 down | 1.130 down | 1.058 down | 1.356 down | 1.269 down | 1.068 down |
| PD0831 | hypothetical protein                                                                     | 1.129 down | 1.066 up   | 1.240 up   | 1.059 down | 1.097 up   | 1.162 down |
| PD0832 | 3-oxoacyl-(acyl carrier protein) synthase                                                | 1.146 down | 1.430 down | 1.118 down | 1.641 down | 1.282 down | 1.279 down |
| PD0833 | methyltransferase, type III restriction-modification system                              | 1.032 up   | 1.066 up   | 1.220 up   | 1.101 up   | 1.259 up   | 1.143 down |
| PD0834 | hypothetical protein                                                                     | 1.220 down | 1.011 up   | 1.001 up   | 1.206 down | 1.218 down | 1.010 up   |
| PD0835 | hypothetical protein                                                                     | 1.064 down | 1.113 up   | 1.055 up   | 1.046 up   | 1.007 down | 1.054 up   |
| PD0836 | haloalkane dehalogenase                                                                  | 1.055 up   | 1.192 up   | 1.348 up   | 1.257 up   | 1.423 up   | 1.131 down |



|        |                                                    |            |            |            |            |            |            |
|--------|----------------------------------------------------|------------|------------|------------|------------|------------|------------|
| PD0837 | ferredoxin                                         | 1.384 down | 1.336 up   | 1.163 up   | 1.035 down | 1.189 down | 1.148 up   |
| PD0838 | hypothetical protein                               | 1.046 down | 1.052 up   | 1.036 up   | 1.005 up   | 1.009 down | 1.015 up   |
| PD0839 | NAD(+) synthase                                    | 1.019 down | 1.185 up   | 1.370 up   | 1.163 up   | 1.344 up   | 1.155 down |
| PD0840 | glycyl-tRNA synthetase alpha subunit               | 1.422 up   | 1.354 down | 1.148 down | 1.050 up   | 1.239 up   | 1.179 down |
| PD0841 | glycyl-tRNA synthetase beta subunit                | 1.104 up   | 1.255 down | 1.186 down | 1.136 down | 1.074 down | 1.058 down |
| PD0842 | hypothetical protein                               | 1.042 up   | 1.113 up   | 1.088 up   | 1.160 up   | 1.135 up   | 1.022 up   |
| PD0843 | TonB protein                                       | 1.130 down | 1.611 down | 1.360 down | 1.822 down | 1.538 down | 1.184 down |
| PD0844 | glutathione synthetase                             | 1.200 down | 1.064 up   | 1.180 up   | 1.127 down | 1.017 down | 1.108 down |
| PD0845 | pilus protein                                      | 1.091 up   | 1.344 down | 1.030 down | 1.466 down | 1.123 down | 1.305 down |
| PD0846 | pilus biogenesis protein                           | 1.073 up   | 1.034 down | 1.092 down | 1.037 up   | 1.018 down | 1.056 up   |
| PD0847 | pilus biogenesis protein                           | 1.010 down | 1.063 down | 1.229 up   | 1.074 down | 1.215 up   | 1.306 down |
| PD0848 | chemotaxis-related protein kinase                  | 1.352 up   | 1.049 up   | 1.152 down | 1.419 up   | 1.173 up   | 1.209 up   |
| PD0849 | glutamate methyltransferase                        | 1.309 up   | 1.225 down | 1.248 down | 1.068 up   | 1.048 up   | 1.018 up   |
| PD0850 | hypothetical protein                               | 1.086 up   | 1.046 down | 1.038 down | 1.037 up   | 1.046 up   | 1.008 down |
| PD0851 | amidophosphoribosyltransferase                     | 1.031 down | 1.068 up   | 1.078 up   | 1.035 up   | 1.045 up   | 1.009 down |
| PD0852 | colicin V production protein                       | 1.175 up   | 1.344 down | 1.431 down | 1.143 down | 1.218 down | 1.064 up   |
| PD0853 | hypothetical protein                               | 1.222 down | 1.266 up   | 1.131 up   | 1.035 up   | 1.081 down | 1.119 up   |
| PD0854 | folylpolyglutamate synthase/dihydrofolate synthase | 1.132 down | 1.229 up   | 1.322 up   | 1.085 up   | 1.167 up   | 1.075 down |
| PD0855 | VirK protein                                       | 1.042 down | 1.114 down | 1.010 up   | 1.162 down | 1.032 down | 1.126 down |
| PD0856 | peptidyl-dipeptidase                               | 1.172 down | 1.051 up   | 1.254 up   | 1.114 down | 1.070 up   | 1.193 down |

|        |                                         |            |            |            |            |            |            |
|--------|-----------------------------------------|------------|------------|------------|------------|------------|------------|
| PD0857 | histone-like protein                    | 1.134 up   | 1.049 down | 1.098 up   | 1.080 up   | 1.246 up   | 1.153 down |
| PD0858 | hypothetical protein                    | 1.143 down | 1.080 down | 1.037 down | 1.235 down | 1.186 down | 1.041 down |
| PD0859 | methionine sulfoxide reductase A        | 1.157 up   | 1.265 down | 1.273 down | 1.092 down | 1.099 down | 1.006 up   |
| PD0860 | proton glutamate symport protein        | 1.158 down | 1.003 down | 1.095 down | 1.163 down | 1.269 down | 1.091 up   |
| PD0861 | transketolase                           | 1.116 up   | 1.172 down | 1.175 down | 1.050 down | 1.053 down | 1.002 up   |
| PD0862 | glucose-inhibited division protein B    | 1.352 up   | 1.788 down | 1.441 down | 1.321 down | 1.065 down | 1.240 down |
| PD0863 | HetI protein                            | 1.300 up   | 1.026 up   | 1.448 down | 1.334 up   | 1.113 down | 1.486 up   |
| PD0864 | exodeoxyribonuclease III                | 1.089 up   | 1.104 down | 1.010 up   | 1.014 down | 1.100 up   | 1.116 down |
| PD0866 | integral membrane protein               | 1.185 down | 1.366 up   | 1.103 up   | 1.152 up   | 1.074 down | 1.238 up   |
| PD0867 | nicotinate-nucleotide pyrophosphorylase | 1.045 down | 1.089 up   | 1.023 up   | 1.042 up   | 1.021 down | 1.064 up   |
| PD0868 | L-aspartate oxidase                     | 1.144 down | 1.122 down | 1.033 up   | 1.284 down | 1.106 down | 1.160 down |
| PD0869 | quinolinate synthetase                  | 1.091 up   | 1.127 up   | 1.123 down | 1.231 up   | 1.029 down | 1.266 up   |
| PD0870 | superoxide dismutase [Mn]               | 1.100 down | 1.099 up   | 1.007 down | 1.001 down | 1.108 down | 1.107 up   |
| PD0871 | Trp operon transcriptional repressor    | 1.014 up   | 1.039 down | 1.003 up   | 1.024 down | 1.018 up   | 1.043 down |
| PD0872 | iron-sulfur flavoprotein                | 1.367 up   | 1.394 down | 1.521 down | 1.019 down | 1.112 down | 1.090 up   |
| PD0873 | hypothetical protein                    | 1.066 up   | 1.099 down | 1.144 down | 1.030 down | 1.072 down | 1.041 up   |
| PD0874 | hypothetical protein                    | 1.102 up   | 1.051 down | 1.047 down | 1.048 up   | 1.052 up   | 1.003 down |
| PD0876 | anthranilate synthase component II      | 1.153 up   | 1.011 down | 1.146 up   | 1.139 up   | 1.322 up   | 1.160 down |
| PD0878 | type V secretory pathway protein        | 1.126 down | 1.158 down | 1.212 down | 1.305 down | 1.366 down | 1.046 up   |
| PD0879 | hypothetical protein                    | 1.294 down | 1.197 up   | 1.107 up   | 1.080 down | 1.168 down | 1.080 up   |

|        |                                              |            |            |            |            |            |            |
|--------|----------------------------------------------|------------|------------|------------|------------|------------|------------|
| PD0880 | hypothetical protein                         | 1.153 down | 1.105 up   | 1.143 up   | 1.043 down | 1.008 down | 1.034 down |
| PD0881 | cell division protein                        | 1.059 up   | 1.236 down | 1.217 down | 1.167 down | 1.149 down | 1.015 down |
| PD0882 | A/G-specific adenine glycosylase             | 1.352 up   | 1.307 down | 1.161 down | 1.033 up   | 1.164 up   | 1.126 down |
| PD0883 | hypothetical protein                         | 1.056 up   | 1.294 down | 1.012 up   | 1.225 down | 1.069 up   | 1.310 down |
| PD0884 | hypothetical protein                         | 1.012 down | 1.041 up   | 1.211 up   | 1.029 up   | 1.196 up   | 1.162 down |
| PD0885 | hypothetical protein                         | 1.181 up   | 1.023 down | 1.069 down | 1.154 up   | 1.104 up   | 1.045 up   |
| PD0886 | Holliday junction resolvase                  | 1.047 down | 1.320 up   | 1.091 up   | 1.260 up   | 1.041 up   | 1.209 up   |
| PD0887 | Holliday junction DNA helicase motor protein | 1.019 up   | 1.000 up   | 1.135 down | 1.019 up   | 1.114 down | 1.136 up   |
| PD0888 | potassium uptake protein                     | 1.015 up   | 1.103 up   | 1.374 up   | 1.120 up   | 1.395 up   | 1.245 down |
| PD0889 | Holliday junction DNA helicase RuvB          | 1.181 up   | 1.204 down | 1.213 down | 1.018 down | 1.027 down | 1.008 up   |
| PD0890 | hypothetical protein                         | 1.106 up   | 1.159 up   | 1.093 down | 1.282 up   | 1.011 up   | 1.268 up   |
| PD0891 | TolQ protein                                 | 1.330 up   | 1.221 up   | 1.131 up   | 1.625 up   | 1.505 up   | 1.079 up   |
| PD0892 | TolR protein                                 | 1.053 down | 1.027 down | 1.198 up   | 1.082 down | 1.138 up   | 1.231 down |
| PD0893 | TolA protein                                 | 1.015 up   | 1.020 down | 1.028 up   | 1.004 down | 1.044 up   | 1.049 down |
| PD0894 | translocation protein TolB precursor         | 1.005 up   | 1.094 down | 1.116 down | 1.087 down | 1.109 down | 1.020 up   |
| PD0895 | outer membrane protein P6 precursor          | 1.082 up   | 1.141 down | 1.122 down | 1.055 down | 1.037 down | 1.017 down |
| PD0896 | hypothetical protein                         | 1.174 up   | 1.106 down | 1.003 up   | 1.061 up   | 1.178 up   | 1.110 down |
| PD0897 | radical activating enzyme                    | 1.148 down | 1.111 down | 1.160 up   | 1.276 down | 1.010 up   | 1.290 down |
| PD0898 | phosphoglyceromutase                         | 1.123 up   | 1.332 down | 1.348 down | 1.186 down | 1.200 down | 1.012 up   |
| PD0899 | deoxyinosine 3'endonuclease                  | 1.328 down | 1.069 down | 1.029 up   | 1.420 down | 1.289 down | 1.101 down |

|        |                                                |            |            |            |            |            |            |
|--------|------------------------------------------------|------------|------------|------------|------------|------------|------------|
| PD0900 | di-tripeptide ABC transporter membrane protein | 1.138 up   | 1.203 down | 1.127 up   | 1.057 down | 1.284 up   | 1.357 down |
| PD0901 | glutathione peroxidase-like protein            | 1.693 up   | 1.412 down | 1.378 down | 1.199 up   | 1.228 up   | 1.024 down |
| PD0902 | ferredoxin-NADP reductase                      | 1.081 down | 1.093 up   | 1.087 down | 1.010 up   | 1.176 down | 1.188 up   |
| PD0903 | thiamine biosynthesis protein ThiC             | 1.034 up   | 1.203 down | 1.334 down | 1.163 down | 1.289 down | 1.108 up   |
| PD0904 | hypothetical protein                           | 1.044 up   | 1.025 down | 1.074 down | 1.018 up   | 1.029 down | 1.047 up   |
| PD0905 | phosphoglycerate mutase                        | 1.042 up   | 1.063 down | 1.010 down | 1.019 down | 1.032 up   | 1.052 down |
| PD0906 | hypothetical protein                           | 1.091 down | 1.584 up   | 1.224 down | 1.451 up   | 1.335 down | 1.939 up   |
| PD0907 | hypothetical protein                           | 1.185 up   | 1.100 up   | 1.196 down | 1.305 up   | 1.009 down | 1.317 up   |
| PD0908 | hypothetical protein                           | 1.010 up   | 1.127 down | 1.027 down | 1.115 down | 1.016 down | 1.097 down |
| PD0909 | hypothetical protein                           | 1.163 up   | 1.104 up   | 1.003 up   | 1.285 up   | 1.167 up   | 1.101 up   |
| PD0910 | hypothetical protein                           | 1.149 down | 2.906 up   | 1.610 up   | 2.528 up   | 1.401 up   | 1.804 up   |
| PD0911 | hypothetical protein                           | 1.278 up   | 1.092 up   | 1.052 up   | 1.395 up   | 1.345 up   | 1.037 up   |
| PD0912 | hypothetical protein                           | 1.566 up   | 1.358 up   | 1.139 up   | 2.127 up   | 1.783 up   | 1.192 up   |
| PD0913 | hypothetical protein                           | 1.199 up   | 1.300 up   | 1.093 down | 1.559 up   | 1.096 up   | 1.421 up   |
| PD0914 | hypothetical protein                           | 1.249 up   | 1.162 up   | 1.102 down | 1.452 up   | 1.133 up   | 1.281 up   |
| PD0915 | hypothetical protein                           | 1.010 up   | 1.211 up   | 1.085 down | 1.223 up   | 1.075 down | 1.315 up   |
| PD0916 | hypothetical protein                           | 1.730 down | 1.616 up   | 1.652 down | 1.070 down | 2.861 down | 2.672 up   |
| PD0917 | hypothetical protein                           | 1.045 up   | 1.030 up   | 1.311 down | 1.076 up   | 1.255 down | 1.351 up   |
| PD0918 | hypothetical protein                           | 1.103 up   | 1.251 down | 1.162 up   | 1.134 down | 1.282 up   | 1.454 down |
| PD0919 | hypothetical protein                           | 1.927 up   | 2.360 down | 1.125 down | 1.224 down | 1.713 up   | 2.097 down |

|        |                      |            |            |            |            |            |            |
|--------|----------------------|------------|------------|------------|------------|------------|------------|
| PD0920 | hypothetical protein | 1.272 up   | 2.269 down | 1.211 down | 1.783 down | 1.050 up   | 1.873 down |
| PD0921 | hypothetical protein | 1.426 up   | 1.946 down | 1.586 down | 1.364 down | 1.112 down | 1.226 down |
| PD0922 | hypothetical protein | 1.109 up   | 1.066 up   | 1.142 up   | 1.183 up   | 1.267 up   | 1.071 down |
| PD0923 | hypothetical protein | 1.018 down | 2.164 up   | 1.151 up   | 2.125 up   | 1.130 up   | 1.879 up   |
| PD0924 | hypothetical protein | 1.109 up   | 1.044 down | 1.117 up   | 1.062 up   | 1.239 up   | 1.166 down |
| PD0925 | hypothetical protein | 1.501 up   | 1.352 up   | 1.058 up   | 2.029 up   | 1.588 up   | 1.277 up   |
| PD0926 | hypothetical protein | 1.168 up   | 1.624 up   | 1.125 up   | 1.897 up   | 1.315 up   | 1.443 up   |
| PD0927 | hypothetical protein | 1.260 up   | 1.110 up   | 1.002 up   | 1.399 up   | 1.263 up   | 1.107 up   |
| PD0928 | hypothetical protein | 1.200 up   | 1.240 up   | 1.290 down | 1.488 up   | 1.074 down | 1.600 up   |
| PD0929 | hypothetical protein | 2.088 down | 1.782 up   | 1.011 down | 1.171 down | 2.112 down | 1.802 up   |
| PD0930 | hypothetical protein | 1.057 down | 1.365 up   | 1.166 down | 1.291 up   | 1.232 down | 1.591 up   |
| PD0931 | hypothetical protein | 1.008 down | 1.396 up   | 1.027 up   | 1.384 up   | 1.019 up   | 1.358 up   |
| PD0932 | hypothetical protein | 1.085 down | 1.078 up   | 1.111 down | 1.006 down | 1.206 down | 1.197 up   |
| PD0933 | hypothetical protein | 1.214 up   | 1.226 down | 1.092 up   | 1.010 down | 1.325 up   | 1.339 down |
| PD0934 | hypothetical protein | 1.015 down | 1.185 up   | 1.147 up   | 1.167 up   | 1.129 up   | 1.032 up   |
| PD0935 | hypothetical protein | 1.213 up   | 1.224 down | 1.301 down | 1.008 down | 1.072 down | 1.063 up   |
| PD0936 | hypothetical protein | 1.032 down | 1.157 up   | 1.193 up   | 1.120 up   | 1.155 up   | 1.031 down |
| PD0937 | hypothetical protein | 1.170 up   | 1.115 up   | 1.046 up   | 1.306 up   | 1.225 up   | 1.065 up   |
| PD0938 | hypothetical protein | 1.157 up   | 1.153 up   | 1.051 up   | 1.334 up   | 1.217 up   | 1.096 up   |
| PD0939 | hypothetical protein | 1.062 down | 1.943 up   | 1.017 up   | 1.828 up   | 1.044 down | 1.909 up   |

|        |                                  |            |            |            |            |            |            |
|--------|----------------------------------|------------|------------|------------|------------|------------|------------|
| PD0940 | hypothetical protein             | 1.045 up   | 1.029 up   | 1.001 up   | 1.076 up   | 1.046 up   | 1.027 up   |
| PD0941 | hypothetical protein             | 1.001 up   | 1.149 down | 1.033 down | 1.147 down | 1.031 down | 1.112 down |
| PD0942 | hypothetical protein             | 1.101 up   | 1.090 down | 1.032 down | 1.010 up   | 1.066 up   | 1.055 down |
| PD0943 | hypothetical protein             | 1.402 up   | 1.297 up   | 1.117 up   | 1.819 up   | 1.567 up   | 1.160 up   |
| PD0945 | transcriptional regulator        | 1.148 up   | 1.109 down | 1.116 down | 1.034 up   | 1.028 up   | 1.005 up   |
| PD0946 | aspartyl-tRNA synthetase         | 1.035 down | 1.523 down | 1.306 down | 1.577 down | 1.352 down | 1.165 down |
| PD0947 | fumarate hydratase               | 1.087 up   | 1.108 down | 1.232 up   | 1.019 down | 1.340 up   | 1.366 down |
| PD0948 | carboxyl-terminal protease       | 1.593 up   | 1.512 down | 1.254 down | 1.053 up   | 1.270 up   | 1.205 down |
| PD0949 | carboxyl-terminal protease       | 1.244 up   | 1.146 down | 1.151 down | 1.085 up   | 1.080 up   | 1.004 up   |
| PD0950 | serine protease                  | 1.067 down | none       | 1.154 up   | 1.067 down | 1.081 up   | 1.155 down |
| PD0952 | conjugal transfer protein        | 1.172 up   | 1.765 up   | 1.028 up   | 2.070 up   | 1.205 up   | 1.716 up   |
| PD0954 | hypothetical protein             | 1.051 up   | 1.062 down | 1.077 up   | 1.010 down | 1.132 up   | 1.144 down |
| PD0955 | hypothetical protein             | 1.137 up   | 1.165 down | 1.077 down | 1.025 down | 1.056 up   | 1.082 down |
| PD0956 | hypothetical protein             | 1.060 up   | 1.177 down | 1.014 up   | 1.110 down | 1.075 up   | 1.194 down |
| PD0957 | phage-related tail fiber protein | 1.028 up   | 1.050 up   | 1.032 down | 1.080 up   | 1.003 down | 1.084 up   |
| PD0958 | hypothetical protein             | 1.054 down | 1.029 up   | 1.001 down | 1.024 down | 1.056 down | 1.030 up   |
| PD0959 | hypothetical protein             | 1.061 up   | 1.112 up   | 1.025 down | 1.181 up   | 1.035 up   | 1.140 up   |
| PD0960 | plasmid stabilization protein    | 1.274 up   | 1.260 down | 1.272 down | 1.011 up   | 1.001 up   | 1.009 up   |
| PD0961 | plasmid stabilization protein    | 1.026 up   | 1.133 up   | 1.063 down | 1.162 up   | 1.036 down | 1.205 up   |
| PD0962 | hypothetical protein             | 1.159 up   | 1.033 down | 1.110 down | 1.121 up   | 1.043 up   | 1.074 up   |

|        |                         |            |            |            |            |            |            |
|--------|-------------------------|------------|------------|------------|------------|------------|------------|
| PD0963 | hypothetical protein    | 1.119 up   | 1.055 down | 1.023 down | 1.060 up   | 1.094 up   | 1.031 down |
| PD0964 | hypothetical protein    | 1.013 down | 1.100 up   | 1.105 up   | 1.086 up   | 1.090 up   | 1.003 down |
| PD0965 | hypothetical protein    | 1.086 down | 1.308 up   | 1.035 down | 1.203 up   | 1.124 down | 1.354 up   |
| PD0966 | hypothetical protein    | 1.195 down | 1.427 up   | 1.313 up   | 1.194 up   | 1.099 up   | 1.086 up   |
| PD0967 | hypothetical protein    | 1.076 up   | 1.162 down | 1.204 down | 1.079 down | 1.119 down | 1.036 up   |
| PD0968 | hypothetical protein    | 1.055 down | 1.108 down | 1.001 down | 1.170 down | 1.056 down | 1.107 down |
| PD0969 | hypothetical protein    | 1.132 up   | 1.029 down | 1.080 down | 1.099 up   | 1.048 up   | 1.049 up   |
| PD0970 | hypothetical protein    | 1.075 up   | 1.089 up   | 1.011 up   | 1.172 up   | 1.088 up   | 1.077 up   |
| PD0971 | hypothetical protein    | 1.140 up   | 1.034 up   | 1.018 down | 1.179 up   | 1.119 up   | 1.053 up   |
| PD0972 | hypothetical protein    | 1.155 up   | 1.212 down | 1.315 down | 1.049 down | 1.138 down | 1.085 up   |
| PD0973 | hypothetical protein    | 1.115 up   | 1.550 down | 1.284 down | 1.390 down | 1.150 down | 1.207 down |
| PD0974 | hypothetical protein    | 1.114 down | 1.568 down | 1.090 down | 1.749 down | 1.215 down | 1.438 down |
| PD0975 | hypothetical protein    | 1.068 up   | 1.179 up   | 1.076 up   | 1.260 up   | 1.151 up   | 1.095 up   |
| PD0976 | hypothetical protein    | 1.074 up   | 1.447 down | 1.396 down | 1.348 down | 1.299 down | 1.037 down |
| PD0977 | hypothetical protein    | 1.055 up   | 1.224 down | 1.200 down | 1.159 down | 1.137 down | 1.019 down |
| PD0978 | hypothetical protein    | 1.047 down | 1.059 up   | 1.133 up   | 1.011 up   | 1.082 up   | 1.070 down |
| PD0979 | hypothetical protein    | 1.014 up   | 1.327 down | 1.149 down | 1.308 down | 1.133 down | 1.154 down |
| PD0980 | hypothetical protein    | 1.109 up   | 1.031 down | 1.187 down | 1.075 up   | 1.070 down | 1.151 up   |
| PD0981 | plasmid-related protein | 1.263 up   | 1.358 down | 1.200 down | 1.075 down | 1.052 up   | 1.131 down |
| PD0982 | hypothetical protein    | 1.112 down | 1.107 up   | 1.065 up   | 1.004 down | 1.044 down | 1.039 up   |

|        |                                     |            |            |            |            |            |            |
|--------|-------------------------------------|------------|------------|------------|------------|------------|------------|
| PD0983 | hypothetical protein                | 1.276 down | 1.101 down | 1.029 up   | 1.406 down | 1.239 down | 1.134 down |
| PD0984 | hypothetical protein                | 1.094 down | 1.213 up   | 1.054 up   | 1.109 up   | 1.037 down | 1.150 up   |
| PD0985 | hypothetical protein                | 1.042 down | 1.057 up   | 1.120 up   | 1.014 up   | 1.074 up   | 1.059 down |
| PD0986 | hemagglutinin-like secreted protein | 1.137 up   | 1.470 up   | 1.353 up   | 1.671 up   | 1.538 up   | 1.086 up   |
| PD0987 | hypothetical protein                | 1.552 up   | 1.134 up   | 1.236 up   | 1.761 up   | 1.919 up   | 1.089 down |
| PD0989 | hypothetical protein                | 1.101 down | 1.043 up   | 1.169 up   | 1.055 down | 1.062 up   | 1.120 down |
| PD0990 | phage-related integrase             | 1.046 up   | 1.167 down | 1.128 down | 1.115 down | 1.078 down | 1.034 down |
| PD0991 | hypothetical protein                | 1.290 up   | 1.027 down | 1.104 down | 1.255 up   | 1.168 up   | 1.075 up   |
| PD0992 | hypothetical protein                | 1.138 up   | 1.138 up   | 1.085 down | 1.296 up   | 1.049 up   | 1.235 up   |
| PD0993 | hypothetical protein                | 1.028 up   | 1.008 down | 1.142 up   | 1.019 up   | 1.175 up   | 1.153 down |
| PD0994 | hypothetical protein                | 1.006 up   | 1.611 up   | 1.095 down | 1.622 up   | 1.087 down | 1.764 up   |
| PD0995 | hypothetical protein                | 1.140 up   | 1.136 down | 1.630 down | 1.003 up   | 1.430 down | 1.435 up   |
| PD0996 | phage-related lysozyme              | 1.006 down | 1.064 down | 1.044 down | 1.070 down | 1.050 down | 1.019 down |
| PD0997 | hypothetical protein                | 1.165 down | 1.124 down | 1.067 up   | 1.310 down | 1.092 down | 1.199 down |
| PD0998 | hypothetical protein                | 1.191 down | 1.411 up   | 1.705 up   | 1.185 up   | 1.431 up   | 1.207 down |
| PD0999 | hypothetical protein                | 1.155 up   | 1.150 up   | 1.092 down | 1.329 up   | 1.058 up   | 1.256 up   |
| PD1000 | hypothetical protein                | 1.102 up   | 1.095 down | 1.304 up   | 1.006 up   | 1.438 up   | 1.429 down |
| PD1001 | hypothetical protein                | 1.159 up   | 1.055 up   | 1.077 down | 1.223 up   | 1.076 up   | 1.136 up   |
| PD1002 | hypothetical protein                | 1.046 down | 1.215 up   | 1.304 up   | 1.161 up   | 1.246 up   | 1.073 down |
| PD1003 | hypothetical protein                | 1.350 up   | 1.155 up   | 1.001 up   | 1.560 up   | 1.352 up   | 1.153 up   |



|        |                                                              |            |            |            |            |            |            |
|--------|--------------------------------------------------------------|------------|------------|------------|------------|------------|------------|
| PD1004 | hypothetical protein                                         | 1.045 up   | 1.011 up   | 1.138 up   | 1.057 up   | 1.189 up   | 1.125 down |
| PD1005 | phage-related repressor protein                              | 1.115 down | 1.026 up   | 1.076 down | 1.087 down | 1.200 down | 1.104 up   |
| PD1006 | cell filamentation protein                                   | 1.143 up   | 1.020 down | 1.115 down | 1.120 up   | 1.025 up   | 1.092 up   |
| PD1007 | hypothetical protein                                         | 1.032 down | 1.171 up   | 1.113 up   | 1.134 up   | 1.078 up   | 1.051 up   |
| PD1008 | hypothetical protein                                         | 1.189 up   | 1.051 down | 1.007 up   | 1.131 up   | 1.198 up   | 1.058 down |
| PD1009 | hypothetical protein                                         | 1.305 up   | 1.128 down | 1.196 down | 1.156 up   | 1.090 up   | 1.060 up   |
| PD1010 | hypothetical protein                                         | 1.245 up   | 1.051 up   | 1.053 up   | 1.310 up   | 1.312 up   | 1.001 down |
| PD1011 | hypothetical protein                                         | 1.076 up   | 1.053 down | 1.183 down | 1.021 up   | 1.100 down | 1.123 up   |
| PD1012 | hypothetical protein                                         | 1.005 down | 1.344 down | 1.244 down | 1.352 down | 1.251 down | 1.080 down |
| PD1013 | hypothetical protein                                         | 1.044 down | 1.016 up   | 1.047 down | 1.027 down | 1.093 down | 1.064 up   |
| PD1014 | hypothetical protein                                         | 1.278 up   | 1.008 up   | 1.164 down | 1.289 up   | 1.098 up   | 1.174 up   |
| PD1015 | UDP-3-O-(R-3-hydroxymyristoyl)-glucosamine N-acyltransferase | 1.049 up   | 1.052 up   | 1.182 down | 1.104 up   | 1.127 down | 1.245 up   |
| PD1016 | hypothetical protein                                         | 1.022 down | 1.347 down | 1.167 down | 1.377 down | 1.193 down | 1.154 down |
| PD1017 | single-strand DNA-binding protein                            | 1.078 up   | 1.688 up   | 1.038 up   | 1.821 up   | 1.120 up   | 1.625 up   |
| PD1018 | hypothetical protein                                         | 1.261 down | 1.171 up   | 1.237 up   | 1.077 down | 1.019 down | 1.056 down |
| PD1019 | phage-related integrase                                      | 1.041 up   | 1.368 up   | 1.086 down | 1.425 up   | 1.043 down | 1.486 up   |
| PD1020 | two-component system, sensor protein                         | 1.063 down | 1.052 up   | 1.103 up   | 1.009 down | 1.037 up   | 1.048 down |
| PD1021 | two-component system, regulatory protein                     | 1.090 up   | 1.006 up   | 1.082 down | 1.097 up   | 1.006 up   | 1.089 up   |
| PD1023 | truncated conjugal transfer protein                          | 1.066 up   | 1.315 up   | 1.059 down | 1.402 up   | 1.006 up   | 1.393 up   |
| PD1024 | ammonium transporter                                         | 1.199 up   | 1.149 down | 1.026 down | 1.043 up   | 1.167 up   | 1.119 down |

|        |                                               |            |            |            |            |            |            |
|--------|-----------------------------------------------|------------|------------|------------|------------|------------|------------|
| PD1025 | nitrogen regulatory protein P-II              | 1.015 down | 1.180 up   | 1.148 up   | 1.162 up   | 1.131 up   | 1.027 up   |
| PD1026 | glutamine synthetase                          | 1.011 down | 1.250 up   | 1.129 up   | 1.236 up   | 1.116 up   | 1.107 up   |
| PD1027 | undecaprenyl pyrophosphate phosphatase        | 1.094 up   | 1.017 down | 1.137 down | 1.076 up   | 1.038 down | 1.117 up   |
| PD1028 | hypothetical protein                          | 1.101 up   | 1.005 down | 1.069 up   | 1.094 up   | 1.177 up   | 1.075 down |
| PD1029 | hypothetical protein                          | 1.015 down | 1.240 down | 1.238 down | 1.259 down | 1.256 down | 1.001 down |
| PD1030 | hypothetical protein                          | 1.622 down | 1.372 up   | 1.402 up   | 1.181 down | 1.156 down | 1.022 down |
| PD1031 | hypothetical protein                          | 1.220 up   | 1.104 up   | 1.058 up   | 1.348 up   | 1.292 up   | 1.043 up   |
| PD1032 | hypothetical protein                          | 1.162 up   | 1.230 up   | 1.192 down | 1.430 up   | 1.026 down | 1.468 up   |
| PD1033 | disulphide isomerase                          | 1.110 up   | 1.036 up   | 1.131 up   | 1.150 up   | 1.256 up   | 1.091 down |
| PD1034 | putative ubiquinone biosynthesis protein UbiB | 1.033 up   | 1.058 down | 1.203 down | 1.024 down | 1.164 down | 1.136 up   |
| PD1035 | hypothetical protein                          | 1.062 up   | 1.036 down | 1.162 up   | 1.025 up   | 1.234 up   | 1.203 down |
| PD1036 | formyltetrahydrofolate deformylase            | 1.127 down | 1.044 down | 1.080 down | 1.177 down | 1.218 down | 1.034 up   |
| PD1037 | hypothetical protein                          | 1.107 up   | 1.018 up   | 1.071 down | 1.127 up   | 1.033 up   | 1.090 up   |
| PD1038 | hypothetical protein                          | 1.117 up   | 1.072 down | 1.116 down | 1.042 up   | 1.001 up   | 1.040 up   |
| PD1039 | ATPase                                        | 1.029 up   | 1.050 down | 1.265 up   | 1.020 down | 1.302 up   | 1.329 down |
| PD1040 | organic hydroperoxide resistance protein      | 1.068 up   | 1.431 down | 1.529 down | 1.339 down | 1.431 down | 1.068 up   |
| PD1041 | Nucleoside-diphosphate-sugar epimerase        | 1.132 down | 1.017 down | 1.126 up   | 1.152 down | 1.005 down | 1.146 down |
| PD1042 | tail-specific protease                        | 1.173 down | 1.187 up   | 1.009 down | 1.011 up   | 1.184 down | 1.197 up   |
| PD1043 | ketol-acid reductoisomerase                   | 1.016 up   | 1.171 down | 1.195 down | 1.152 down | 1.176 down | 1.020 up   |
| PD1044 | acetolactate synthase II large subunit        | 1.343 up   | 1.182 down | 1.084 down | 1.136 up   | 1.238 up   | 1.090 down |

|        |                                                      |            |            |            |            |            |            |
|--------|------------------------------------------------------|------------|------------|------------|------------|------------|------------|
| PD1045 | acetolactate synthase isozyme II small sbunit        | 1.041 up   | 1.171 down | 1.111 down | 1.124 down | 1.067 down | 1.053 down |
| PD1046 | threonine dehydratase                                | 1.002 up   | 1.049 down | 1.086 down | 1.047 down | 1.083 down | 1.034 up   |
| PD1047 | 2-isopropylmalate synthase                           | 1.029 up   | 1.246 down | 1.270 up   | 1.210 down | 1.307 up   | 1.583 down |
| PD1048 | 3-oxoacyl-(acyl carrier protein) synthase            | 1.122 up   | 1.026 up   | 1.051 down | 1.151 up   | 1.067 up   | 1.079 up   |
| PD1049 | 50S ribosomal protein L32                            | 1.205 up   | 1.145 up   | 1.015 up   | 1.381 up   | 1.223 up   | 1.128 up   |
| PD1050 | hypothetical protein                                 | 1.220 down | 1.511 up   | 1.342 up   | 1.238 up   | 1.099 up   | 1.126 up   |
| PD1051 | hypothetical protein                                 | 1.364 up   | 1.240 down | 1.066 down | 1.100 up   | 1.278 up   | 1.162 down |
| PD1052 | methanol dehydrogenase regulatory protein            | 1.222 down | 1.344 down | 1.185 down | 1.643 down | 1.449 down | 1.134 down |
| PD1053 | hypothetical protein                                 | 1.140 up   | 1.134 down | 1.114 down | 1.005 up   | 1.023 up   | 1.017 down |
| PD1054 | hypothetical protein                                 | 1.021 up   | 1.147 down | 1.191 down | 1.123 down | 1.166 down | 1.038 up   |
| PD1055 | outer membrane protein Slp precursor                 | 1.305 down | 1.351 up   | 1.452 up   | 1.035 up   | 1.113 up   | 1.075 down |
| PD1056 | histidine triad-like protein                         | 1.112 down | 1.028 up   | 1.134 up   | 1.081 down | 1.020 up   | 1.103 down |
| PD1057 | recombination protein RecR                           | 1.167 up   | 1.136 up   | 1.224 down | 1.326 up   | 1.048 down | 1.391 up   |
| PD1058 | hypothetical protein                                 | 1.074 up   | 1.026 down | 1.177 down | 1.046 up   | 1.096 down | 1.147 up   |
| PD1059 | DNA polymerase III subunits gamma and tau            | 1.024 up   | 1.225 up   | 1.202 up   | 1.255 up   | 1.231 up   | 1.019 up   |
| PD1061 | DNA-damage-inducible protein D                       | 1.236 down | 1.197 up   | 1.081 up   | 1.032 down | 1.143 down | 1.107 up   |
| PD1063 | hypothetical protein                                 | 1.292 up   | 1.234 down | 1.397 down | 1.047 up   | 1.081 down | 1.132 up   |
| PD1064 | NAD(P)H-dependent glycerol-3-phosphate dehydrogenase | 1.180 up   | 1.003 down | 1.047 down | 1.176 up   | 1.127 up   | 1.043 up   |
| PD1065 | export protein SecB                                  | 1.248 up   | 1.109 down | 1.112 down | 1.125 up   | 1.121 up   | 1.003 up   |
| PD1066 | hypothetical protein                                 | 1.053 up   | 1.003 down | 1.101 down | 1.049 up   | 1.045 down | 1.097 up   |

|        |                                                            |            |            |            |            |            |            |
|--------|------------------------------------------------------------|------------|------------|------------|------------|------------|------------|
| PD1067 | hypothetical protein                                       | 1.149 up   | 1.020 up   | 1.005 up   | 1.172 up   | 1.155 up   | 1.015 up   |
| PD1068 | uroporphyrinogen-III synthetase                            | 1.154 down | 1.214 down | 1.056 up   | 1.402 down | 1.092 down | 1.283 down |
| PD1069 | hypothetical protein                                       | 1.000 up   | 1.200 up   | 1.140 down | 1.201 up   | 1.139 down | 1.369 up   |
| PD1070 | porphyrin biosynthesis protein                             | 1.123 up   | 1.194 down | 1.450 down | 1.062 down | 1.291 down | 1.214 up   |
| PD1071 | biotin--protein ligase                                     | 1.148 up   | 1.021 down | 1.071 up   | 1.124 up   | 1.230 up   | 1.094 down |
| PD1072 | transcriptional regulator                                  | 1.039 down | 1.063 up   | 1.040 up   | 1.023 up   | 1.001 up   | 1.022 up   |
| PD1073 | hypothetical protein                                       | 1.121 up   | 1.171 up   | 1.144 up   | 1.313 up   | 1.283 up   | 1.023 up   |
| PD1075 | phage-related integrase                                    | 1.105 up   | 1.117 up   | 1.036 up   | 1.235 up   | 1.146 up   | 1.077 up   |
| PD1076 | hypothetical protein                                       | 1.082 up   | 1.090 down | 1.015 down | 1.006 down | 1.066 up   | 1.073 down |
| PD1077 | fimbrillin                                                 | 1.043 down | 1.047 down | 1.066 up   | 1.093 down | 1.021 up   | 1.117 down |
| PD1078 | hypothetical protein                                       | 1.027 up   | 1.116 down | 1.012 up   | 1.086 down | 1.040 up   | 1.130 down |
| PD1080 | hypothetical protein                                       | 1.062 down | 1.225 up   | 1.080 up   | 1.153 up   | 1.016 up   | 1.133 up   |
| PD1081 | DNA mismatch repair protein                                | 1.033 up   | 1.360 down | 1.039 down | 1.316 down | 1.005 down | 1.308 down |
| PD1082 | monofunctional biosynthetic peptidoglycan transglycosylase | 1.011 up   | 1.050 up   | 1.143 up   | 1.062 up   | 1.156 up   | 1.088 down |
| PD1083 | heat shock protein HSP33                                   | 1.248 down | 1.053 up   | 1.026 up   | 1.185 down | 1.216 down | 1.026 up   |
| PD1084 | hypothetical protein                                       | 1.053 up   | 1.575 down | 1.003 down | 1.495 down | 1.049 up   | 1.569 down |
| PD1086 | hypothetical protein                                       | 1.213 up   | 1.055 down | 1.159 up   | 1.149 up   | 1.407 up   | 1.224 down |
| PD1087 | hypothetical protein                                       | 1.046 up   | 1.153 up   | 1.074 up   | 1.207 up   | 1.124 up   | 1.073 up   |
| PD1088 | phage-related tail protein                                 | 1.008 up   | 1.082 up   | 1.045 down | 1.091 up   | 1.036 down | 1.131 up   |
| PD1089 | phage-related tail protein                                 | 1.068 down | 1.162 up   | 1.035 down | 1.087 up   | 1.106 down | 1.203 up   |

|        |                                               |            |            |            |            |            |          |
|--------|-----------------------------------------------|------------|------------|------------|------------|------------|----------|
| PD1090 | phage-related tail protein                    | 1.198 down | 1.412 up   | 1.264 up   | 1.177 up   | 1.054 up   | 1.117 up |
| PD1091 | hypothetical protein                          | 1.071 down | 1.256 up   | 1.077 down | 1.172 up   | 1.154 down | 1.353 up |
| PD1092 | hypothetical protein                          | 1.044 down | 1.242 up   | 1.059 up   | 1.189 up   | 1.014 up   | 1.172 up |
| PD1093 | hypothetical protein                          | 1.118 down | 1.576 up   | 1.060 up   | 1.408 up   | 1.055 down | 1.486 up |
| PD1094 | phage-related contractile tail sheath protein | 1.011 up   | 1.391 up   | 1.214 up   | 1.407 up   | 1.228 up   | 1.145 up |
| PD1095 | hypothetical protein                          | 1.048 up   | 1.430 up   | 1.003 up   | 1.500 up   | 1.052 up   | 1.425 up |
| PD1096 | phage-related tail protein                    | 1.087 down | 1.090 up   | 1.026 down | 1.003 up   | 1.116 down | 1.119 up |
| PD1097 | phage-related baseplate assembly protein      | 1.114 down | 1.757 up   | 1.104 down | 1.576 up   | 1.230 down | 1.939 up |
| PD1098 | phage-related baseplate assembly protein      | 1.028 down | 1.237 up   | 1.083 up   | 1.203 up   | 1.053 up   | 1.142 up |
| PD1099 | DNA-damage-inducible protein                  | 1.114 down | 1.075 up   | 1.009 down | 1.036 down | 1.125 down | 1.085 up |
| PD1100 | hypothetical protein                          | 1.264 down | 1.346 up   | 1.200 up   | 1.065 up   | 1.053 down | 1.121 up |
| PD1101 | phage-related baseplate assembly protein      | 1.147 down | 1.457 up   | 1.166 up   | 1.269 up   | 1.016 up   | 1.248 up |
| PD1102 | hypothetical protein                          | 1.161 down | 1.282 up   | 1.005 down | 1.104 up   | 1.167 down | 1.290 up |
| PD1103 | hypothetical protein                          | 1.089 down | 1.170 up   | 1.016 up   | 1.074 up   | 1.072 down | 1.152 up |
| PD1104 | hypothetical protein                          | 1.032 up   | 1.311 up   | 1.157 up   | 1.353 up   | 1.195 up   | 1.132 up |
| PD1105 | hypothetical protein                          | 1.047 down | 1.225 up   | 1.103 down | 1.169 up   | 1.155 down | 1.351 up |
| PD1106 | hypothetical protein                          | 1.005 up   | 1.448 up   | 1.267 up   | 1.455 up   | 1.273 up   | 1.142 up |
| PD1107 | phage-related portal protein                  | 1.034 down | 1.382 up   | 1.085 down | 1.336 up   | 1.122 down | 1.500 up |
| PD1108 | hypothetical protein                          | 1.204 down | 1.418 up   | 1.180 up   | 1.177 up   | 1.019 down | 1.201 up |
| PD1109 | phage-related terminase large subunit         | 1.036 up   | 1.030 down | 1.302 down | 1.006 up   | 1.256 down | 1.263 up |

|        |                                 |            |            |            |            |            |            |
|--------|---------------------------------|------------|------------|------------|------------|------------|------------|
| PD1110 | phage-related packaging protein | 1.007 down | 1.911 up   | 1.015 up   | 1.896 up   | 1.007 up   | 1.881 up   |
| PD1111 | hypothetical protein            | 1.003 up   | 1.954 up   | 1.246 up   | 1.961 up   | 1.250 up   | 1.567 up   |
| PD1112 | hypothetical protein            | 1.101 up   | 1.197 up   | 1.174 up   | 1.319 up   | 1.294 up   | 1.019 up   |
| PD1113 | phage-related lysozyme          | 1.032 down | 1.573 up   | 1.260 up   | 1.523 up   | 1.220 up   | 1.248 up   |
| PD1114 | hypothetical protein            | 1.075 up   | 2.072 up   | 1.368 up   | 2.229 up   | 1.472 up   | 1.514 up   |
| PD1115 | hypothetical protein            | 1.021 up   | 1.108 up   | 1.021 up   | 1.132 up   | 1.043 up   | 1.085 up   |
| PD1116 | hypothetical protein            | 1.143 up   | 1.018 up   | 1.211 down | 1.164 up   | 1.059 down | 1.234 up   |
| PD1117 | hypothetical protein            | 1.134 down | 1.198 up   | 1.197 up   | 1.056 up   | 1.055 up   | 1.001 up   |
| PD1118 | hypothetical protein            | 1.232 up   | 1.005 down | 1.264 up   | 1.225 up   | 1.558 up   | 1.271 down |
| PD1119 | hypothetical protein            | 1.458 down | 2.182 up   | 1.651 up   | 1.496 up   | 1.131 up   | 1.321 up   |
| PD1120 | hypothetical protein            | 1.022 down | 1.283 up   | 1.041 up   | 1.255 up   | 1.018 up   | 1.232 up   |
| PD1121 | hypothetical protein            | 1.003 down | 2.228 down | 1.267 down | 2.236 down | 1.272 down | 1.757 down |
| PD1122 | hypothetical protein            | 1.190 up   | 1.071 up   | 1.270 down | 1.276 up   | 1.066 down | 1.361 up   |
| PD1123 | hypothetical protein            | 1.117 up   | 1.120 up   | 1.030 up   | 1.252 up   | 1.151 up   | 1.087 up   |
| PD1124 | hypothetical protein            | 1.195 up   | 1.146 up   | 1.033 up   | 1.371 up   | 1.236 up   | 1.109 up   |
| PD1125 | hypothetical protein            | 1.024 up   | 1.007 down | 1.203 down | 1.016 up   | 1.174 down | 1.193 up   |
| PD1126 | hypothetical protein            | 1.019 up   | 1.300 up   | 1.116 up   | 1.325 up   | 1.138 up   | 1.164 up   |
| PD1127 | hypothetical protein            | 1.158 up   | 1.101 down | 1.274 down | 1.052 up   | 1.100 down | 1.157 up   |
| PD1128 | hypothetical protein            | 1.059 down | 1.301 down | 1.465 down | 1.379 down | 1.552 down | 1.125 up   |
| PD1129 | hypothetical protein            | 1.030 up   | 1.357 up   | 1.215 up   | 1.398 up   | 1.252 up   | 1.116 up   |

|        |                                                     |            |            |            |            |            |            |
|--------|-----------------------------------------------------|------------|------------|------------|------------|------------|------------|
| PD1130 | hypothetical protein                                | 1.384 up   | 1.302 down | 1.823 down | 1.063 up   | 1.316 down | 1.399 up   |
| PD1131 | hypothetical protein                                | 1.013 up   | 1.204 up   | 1.011 down | 1.220 up   | 1.002 up   | 1.217 up   |
| PD1132 | hypothetical protein                                | 1.054 up   | 1.576 up   | 1.000 up   | 1.662 up   | 1.055 up   | 1.575 up   |
| PD1133 | hypothetical protein                                | 1.031 up   | 1.163 up   | 1.087 up   | 1.199 up   | 1.121 up   | 1.069 up   |
| PD1134 | phage-related DNA polymerase                        | 1.023 up   | 1.539 up   | 1.010 up   | 1.576 up   | 1.034 up   | 1.523 up   |
| PD1135 | hypothetical protein                                | 1.095 up   | 1.442 up   | 1.087 up   | 1.580 up   | 1.191 up   | 1.326 up   |
| PD1136 | hypothetical protein                                | 1.237 up   | 1.105 down | 1.006 down | 1.120 up   | 1.229 up   | 1.097 down |
| PD1137 | hypothetical protein                                | 1.124 up   | 1.527 up   | 1.188 up   | 1.716 up   | 1.335 up   | 1.284 up   |
| PD1138 | hypothetical protein                                | 1.148 down | 1.230 up   | 1.042 down | 1.071 up   | 1.197 down | 1.282 up   |
| PD1139 | phage-related integrase                             | 1.193 up   | 2.131 up   | 1.218 up   | 2.543 up   | 1.453 up   | 1.749 up   |
| PD1140 | hypothetical protein                                | 1.103 up   | 1.046 down | 1.359 down | 1.054 up   | 1.232 down | 1.299 up   |
| PD1141 | ankyrin-like protein                                | 1.087 down | 1.043 down | 1.095 up   | 1.134 down | 1.007 up   | 1.143 down |
| PD1142 | 3-oxoacyl-(acyl carrier protein) synthase           | 1.262 down | 1.005 down | 1.089 up   | 1.269 down | 1.158 down | 1.095 down |
| PD1143 | hypothetical protein                                | 1.070 down | 1.201 down | 1.128 down | 1.286 down | 1.208 down | 1.064 down |
| PD1144 | dolichyl-phosphate mannose synthase related protein | 1.244 up   | 1.353 down | 1.300 down | 1.087 down | 1.045 down | 1.040 down |
| PD1145 | hypothetical protein                                | 1.163 up   | 1.383 down | 1.339 down | 1.188 down | 1.150 down | 1.033 down |
| PD1146 | glycosyl transferase                                | 1.213 down | 1.226 up   | 1.172 up   | 1.010 up   | 1.035 down | 1.046 up   |
| PD1147 | twitching motility protein                          | 1.002 up   | 1.213 down | 1.249 down | 1.210 down | 1.246 down | 1.029 up   |
| PD1148 | twitching motility protein                          | 1.095 down | 1.200 down | 1.084 up   | 1.314 down | 1.009 down | 1.301 down |
| PD1149 | transcriptional regulator                           | 1.005 down | 1.072 down | 1.175 up   | 1.078 down | 1.168 up   | 1.260 down |

|        |                                                    |            |            |            |            |            |            |
|--------|----------------------------------------------------|------------|------------|------------|------------|------------|------------|
| PD1150 | hypothetical protein                               | 1.203 down | 1.001 down | 1.046 down | 1.205 down | 1.259 down | 1.045 up   |
| PD1151 | hypothetical protein                               | 1.012 down | 1.021 up   | 1.128 down | 1.009 up   | 1.142 down | 1.152 up   |
| PD1152 | porphobilinogen deaminase                          | 1.220 up   | 1.298 down | 1.407 down | 1.063 down | 1.152 down | 1.084 up   |
| PD1153 | two-component system, regulatory protein           | 1.041 up   | 1.183 down | 1.184 down | 1.136 down | 1.137 down | 1.001 up   |
| PD1154 | two-component system, sensor protein               | 1.048 up   | 1.270 down | 1.380 down | 1.211 down | 1.315 down | 1.085 up   |
| PD1155 | carboxylesterase                                   | 1.004 up   | 1.020 up   | 1.235 down | 1.025 up   | 1.230 down | 1.260 up   |
| PD1156 | glucosyltransferase MdoH                           | 1.125 down | 1.106 down | 1.177 down | 1.244 down | 1.325 down | 1.064 up   |
| PD1157 | beta-lactamase-like protein                        | 1.285 down | 1.040 up   | 1.046 down | 1.235 down | 1.345 down | 1.088 up   |
| PD1158 | hypothetical protein                               | 1.039 up   | 1.464 down | 1.132 down | 1.408 down | 1.088 down | 1.293 down |
| PD1159 | transcriptional regulator                          | 1.311 down | 1.592 down | 1.265 down | 2.088 down | 1.659 down | 1.258 down |
| PD1162 | hypothetical protein                               | 1.188 up   | 1.124 down | 1.240 down | 1.057 up   | 1.043 down | 1.103 up   |
| PD1163 | fructokinase                                       | 1.065 up   | 1.004 up   | 1.061 up   | 1.070 up   | 1.130 up   | 1.056 down |
| PD1164 | glucose/galactose transporter                      | 1.166 up   | 1.087 up   | 1.151 up   | 1.268 up   | 1.343 up   | 1.058 down |
| PD1165 | nucleoprotein/polynucleotide-associated enzyme     | 1.167 up   | 1.025 down | 1.182 down | 1.138 up   | 1.012 down | 1.153 up   |
| PD1166 | hypothetical protein                               | 1.249 up   | 1.057 up   | 1.085 down | 1.320 up   | 1.151 up   | 1.147 up   |
| PD1167 | UDP-glucose dehydrogenase                          | 1.189 down | 1.137 down | 1.067 up   | 1.353 down | 1.114 down | 1.213 down |
| PD1168 | macrophage infectivity potentiator                 | 1.023 down | 1.125 up   | 1.117 up   | 1.099 up   | 1.091 up   | 1.007 up   |
| PD1169 | glutathione peroxidase/vitamin B12 uptake permease | 1.040 down | 1.248 up   | 1.273 up   | 1.200 up   | 1.223 up   | 1.019 down |
| PD1170 | ABC transporter ATP-binding protein                | 1.004 down | 1.174 down | 1.172 down | 1.179 down | 1.177 down | 1.002 down |
| PD1171 | hypothetical protein                               | 1.069 down | 1.037 up   | 1.158 up   | 1.030 down | 1.083 up   | 1.117 down |



|        |                                        |            |            |            |            |            |            |
|--------|----------------------------------------|------------|------------|------------|------------|------------|------------|
| PD1172 | hypothetical protein                   | 1.281 up   | 1.215 down | 1.164 down | 1.054 up   | 1.101 up   | 1.044 down |
| PD1173 | phage-related tail fiber protein       | 1.017 down | 1.072 down | 1.003 down | 1.091 down | 1.021 down | 1.068 down |
| PD1174 | hypothetical protein                   | 1.055 down | 1.317 up   | 1.070 up   | 1.248 up   | 1.014 up   | 1.230 up   |
| PD1175 | hypothetical protein                   | 1.253 up   | 1.028 down | 1.208 down | 1.219 up   | 1.037 up   | 1.175 up   |
| PD1176 | hypothetical protein                   | 1.094 up   | 1.076 down | 1.146 up   | 1.016 up   | 1.255 up   | 1.235 down |
| PD1177 | hypothetical protein                   | 1.107 up   | 1.099 down | 1.082 up   | 1.007 up   | 1.198 up   | 1.190 down |
| PD1178 | hypothetical protein                   | 1.372 up   | 1.110 down | 1.181 down | 1.235 up   | 1.161 up   | 1.063 up   |
| PD1179 | hypothetical protein                   | 1.076 up   | 1.140 up   | 1.017 up   | 1.227 up   | 1.094 up   | 1.121 up   |
| PD1180 | hypothetical protein                   | 1.039 up   | 1.007 up   | 1.191 down | 1.047 up   | 1.146 down | 1.200 up   |
| PD1181 | hypothetical protein                   | 1.200 down | 1.415 up   | 1.214 up   | 1.179 up   | 1.011 up   | 1.165 up   |
| PD1182 | hypothetical protein                   | 1.079 up   | 1.476 up   | 1.123 down | 1.593 up   | 1.040 down | 1.659 up   |
| PD1183 | anti-toxin protein                     | 1.219 up   | 1.020 up   | 1.171 up   | 1.243 up   | 1.429 up   | 1.148 down |
| PD1184 | toxin-like protein                     | 1.112 up   | 1.417 down | 1.205 down | 1.274 down | 1.084 down | 1.175 down |
| PD1185 | hypothetical protein                   | 1.219 up   | 1.027 up   | 1.049 down | 1.252 up   | 1.161 up   | 1.078 up   |
| PD1186 | hypothetical protein                   | 1.025 down | 1.200 down | 1.135 up   | 1.231 down | 1.107 up   | 1.362 down |
| PD1187 | hypothetical protein                   | 1.109 up   | 1.026 down | 1.011 down | 1.080 up   | 1.096 up   | 1.014 down |
| PD1188 | truncated phage-related protein        | 1.111 up   | 1.063 up   | 1.145 up   | 1.181 up   | 1.272 up   | 1.077 down |
| PD1190 | truncated phage-related DNA polymerase | 1.139 down | 1.088 down | 1.027 down | 1.239 down | 1.170 down | 1.059 down |
| PD1192 | hypothetical protein                   | 1.019 up   | 1.248 up   | 1.195 down | 1.272 up   | 1.172 down | 1.491 up   |
| PD1193 | hypothetical protein                   | 1.052 down | 1.302 down | 1.015 down | 1.370 down | 1.068 down | 1.283 down |

|        |                                               |            |            |            |            |            |            |
|--------|-----------------------------------------------|------------|------------|------------|------------|------------|------------|
| PD1194 | hypothetical protein                          | 1.019 up   | 1.661 up   | 1.237 up   | 1.694 up   | 1.261 up   | 1.343 up   |
| PD1195 | hypothetical protein                          | 1.289 down | 1.375 up   | 1.326 up   | 1.066 up   | 1.028 up   | 1.037 up   |
| PD1196 | phage-related integrase                       | 1.088 down | 1.583 up   | 1.101 up   | 1.454 up   | 1.012 up   | 1.436 up   |
| PD1197 | ABC transporter ATP-binding protein           | 1.021 down | 1.029 up   | 1.061 down | 1.007 up   | 1.084 down | 1.092 up   |
| PD1198 | ferric enterobactin receptor                  | 1.084 down | 1.072 up   | 1.020 up   | 1.010 down | 1.061 down | 1.050 up   |
| PD1199 | polyketide synthase                           | 1.152 down | 1.125 down | 1.116 down | 1.296 down | 1.286 down | 1.008 down |
| PD1200 | ferric enterobactin receptor                  | 1.033 up   | 1.073 down | 1.125 up   | 1.038 down | 1.163 up   | 1.208 down |
| PD1201 | cation:proton antiporter                      | 1.267 up   | 1.058 up   | 1.056 down | 1.342 up   | 1.199 up   | 1.118 up   |
| PD1202 | ABC transporter phosphate binding protein     | 1.118 down | 1.181 up   | 1.014 down | 1.056 up   | 1.134 down | 1.198 up   |
| PD1203 | ABC transporter phosphate permease            | 1.223 up   | 1.502 down | 1.126 down | 1.228 down | 1.085 up   | 1.333 down |
| PD1204 | ABC transporter phosphate permease            | 1.036 up   | 1.300 down | 1.129 down | 1.254 down | 1.089 down | 1.151 down |
| PD1205 | phosphate ABC transporter ATP-binding protein | 1.087 down | 1.061 down | 1.120 up   | 1.154 down | 1.029 up   | 1.188 down |
| PD1206 | phosphate regulon transcriptional regulator   | 1.230 down | 1.008 up   | 1.038 up   | 1.220 down | 1.185 down | 1.029 down |
| PD1207 | ribonuclease T                                | 1.032 down | 1.144 down | 1.051 up   | 1.182 down | 1.017 up   | 1.203 down |
| PD1208 | dimethyladenosine transferase                 | 1.061 down | 1.400 down | 1.310 down | 1.486 down | 1.390 down | 1.068 down |
| PD1209 | hypothetical protein                          | 1.174 down | 1.322 down | 1.318 down | 1.554 down | 1.549 down | 1.003 down |
| PD1210 | diadenosinetetraphosphatase                   | 1.057 down | 1.036 up   | 1.010 down | 1.020 down | 1.069 down | 1.047 up   |
| PD1211 | hypothetical protein                          | 1.199 down | 1.331 down | 1.085 down | 1.596 down | 1.302 down | 1.226 down |
| PD1212 | saccharide biosynthesis regulatory protein    | 1.022 up   | 1.131 down | 1.013 up   | 1.107 down | 1.035 up   | 1.146 down |
| PD1213 | 3-deoxy-D-manno-octulosonic-acid kinase       | 1.261 up   | 1.012 down | 1.092 down | 1.245 up   | 1.154 up   | 1.078 up   |

|        |                                                   |            |            |            |            |            |            |
|--------|---------------------------------------------------|------------|------------|------------|------------|------------|------------|
| PD1214 | hypothetical protein                              | 1.038 down | 1.335 up   | 1.074 up   | 1.286 up   | 1.035 up   | 1.242 up   |
| PD1216 | protein phosphatase                               | 1.205 down | 1.013 down | 1.355 down | 1.221 down | 1.634 down | 1.337 up   |
| PD1217 | DNA polymerase III subunit epsilon                | 1.084 up   | 1.033 down | 1.358 down | 1.049 up   | 1.252 down | 1.314 up   |
| PD1218 | ribonuclease H                                    | 1.182 down | 1.152 up   | 1.099 up   | 1.026 down | 1.074 down | 1.047 up   |
| PD1219 | hypothetical protein                              | 1.070 down | 2.240 down | 1.280 down | 2.398 down | 1.371 down | 1.749 down |
| PD1220 | hydroxyacylglutathione hydrolase                  | 1.113 down | 1.240 down | 1.243 down | 1.381 down | 1.385 down | 1.002 up   |
| PD1221 | plasmid protein                                   | 1.238 down | 1.231 up   | 1.193 up   | 1.006 down | 1.037 down | 1.031 up   |
| PD1222 | hypothetical protein                              | 1.223 down | 1.007 down | 1.059 up   | 1.232 down | 1.154 down | 1.067 down |
| PD1223 | transcription-related protein                     | 1.042 up   | 1.404 down | 1.157 down | 1.347 down | 1.110 down | 1.212 down |
| PD1224 | hypothetical protein                              | 1.009 up   | 1.014 up   | 1.064 down | 1.023 up   | 1.054 down | 1.079 up   |
| PD1225 | hypothetical protein                              | 1.130 down | 1.185 down | 1.268 down | 1.340 down | 1.434 down | 1.069 up   |
| PD1226 | inorganic pyrophosphatase                         | 1.099 down | 1.096 down | 1.153 down | 1.205 down | 1.267 down | 1.052 up   |
| PD1227 | hypothetical protein                              | 1.171 down | 1.644 down | 2.018 down | 1.926 down | 2.365 down | 1.227 up   |
| PD1228 | hypothetical protein                              | 1.001 up   | 1.208 down | 1.077 up   | 1.206 down | 1.079 up   | 1.302 down |
| PD1229 | Thioredoxin domain-containing protein             | 1.040 down | 1.166 up   | 1.146 up   | 1.121 up   | 1.102 up   | 1.016 up   |
| PD1230 | leucyl-tRNA synthetase                            | 1.153 down | 1.153 up   | 1.021 down | none       | 1.178 down | 1.178 up   |
| PD1231 | rare lipoprotein B precursor                      | 1.035 up   | 1.202 down | 1.132 down | 1.161 down | 1.093 down | 1.061 down |
| PD1232 | DNA polymerase III subunit delta                  | 1.059 up   | 1.570 down | 1.888 down | 1.482 down | 1.783 down | 1.202 up   |
| PD1233 | nicotinic acid mononucleotide adenylyltransferase | 1.300 down | 1.025 up   | 1.329 down | 1.267 down | 1.728 down | 1.364 up   |
| PD1234 | hypothetical protein                              | 1.228 down | 1.172 down | 1.265 down | 1.440 down | 1.555 down | 1.079 up   |

|        |                                         |            |            |            |            |            |            |
|--------|-----------------------------------------|------------|------------|------------|------------|------------|------------|
| PD1235 | membrane-bound lytic transglycosylase   | 1.215 down | 1.110 down | 1.019 up   | 1.349 down | 1.191 down | 1.131 down |
| PD1236 | rare lipoprotein A                      | 1.154 down | 1.051 down | 1.105 up   | 1.214 down | 1.044 down | 1.162 down |
| PD1237 | hypothetical protein                    | 1.027 down | 1.253 down | 1.237 down | 1.287 down | 1.270 down | 1.012 down |
| PD1238 | hypothetical protein                    | 1.244 up   | 1.609 down | 1.200 down | 1.293 down | 1.036 up   | 1.340 down |
| PD1239 | hypothetical protein                    | 1.072 up   | 1.072 up   | 1.078 up   | 1.150 up   | 1.157 up   | 1.005 down |
| PD1240 | hypothetical protein                    | 1.379 up   | 1.152 up   | 1.096 up   | 1.589 up   | 1.512 up   | 1.050 up   |
| PD1241 | hypothetical protein                    | 1.632 up   | 1.295 down | 1.106 down | 1.260 up   | 1.475 up   | 1.170 down |
| PD1242 | hypothetical protein                    | 1.191 up   | 1.158 up   | 1.028 down | 1.380 up   | 1.158 up   | 1.191 up   |
| PD1243 | hypothetical protein                    | 1.316 up   | 2.342 down | 1.197 down | 1.778 down | 1.099 up   | 1.956 down |
| PD1244 | hypothetical protein                    | 1.041 up   | 1.781 down | 1.160 down | 1.710 down | 1.114 down | 1.535 down |
| PD1245 | hypothetical protein                    | 1.444 up   | 2.329 down | 1.327 down | 1.613 down | 1.088 up   | 1.755 down |
| PD1247 | hypothetical protein                    | 1.085 up   | 1.143 down | 1.048 up   | 1.053 down | 1.138 up   | 1.199 down |
| PD1248 | hypothetical protein                    | 1.166 up   | 1.005 down | 1.240 up   | 1.160 up   | 1.446 up   | 1.246 down |
| PD1249 | hypothetical protein                    | 1.148 up   | 1.018 up   | 1.107 up   | 1.169 up   | 1.272 up   | 1.087 down |
| PD1250 | hypothetical protein                    | 1.102 up   | 1.335 down | 1.043 up   | 1.211 down | 1.150 up   | 1.393 down |
| PD1251 | ribosomal protein L11 methyltransferase | 1.086 up   | 1.088 up   | 1.246 down | 1.181 up   | 1.147 down | 1.356 up   |
| PD1252 | hypothetical protein                    | 1.157 up   | 1.016 up   | 1.020 down | 1.176 up   | 1.134 up   | 1.036 up   |
| PD1253 | elongation factor P                     | 1.371 up   | 1.238 up   | 1.077 up   | 1.698 up   | 1.477 up   | 1.150 up   |
| PD1254 | oxidoreductase                          | 1.028 up   | 1.487 down | 1.369 down | 1.445 down | 1.331 down | 1.086 down |
| PD1255 | D-3-phosphoglycerate dehydrogenase      | 1.226 up   | 1.185 down | 1.288 down | 1.034 up   | 1.051 down | 1.087 up   |

|        |                                                                                                            |            |            |            |            |            |            |
|--------|------------------------------------------------------------------------------------------------------------|------------|------------|------------|------------|------------|------------|
| PD1256 | cationic amino acid transporter                                                                            | 1.031 down | 1.006 up   | 1.161 up   | 1.023 down | 1.126 up   | 1.153 down |
| PD1257 | cationic amino acid transporter                                                                            | 1.086 down | 1.682 down | 1.354 down | 1.828 down | 1.472 down | 1.241 down |
| PD1258 | hypothetical protein                                                                                       | 1.044 down | 1.035 up   | 1.175 down | 1.008 down | 1.227 down | 1.216 up   |
| PD1259 | methionine salvage pathway enzyme                                                                          | 1.303 down | 1.259 up   | 1.398 up   | 1.034 down | 1.072 up   | 1.109 down |
| PD1260 | enolase-phosphatase                                                                                        | 1.043 up   | 1.069 down | 1.142 up   | 1.024 down | 1.191 up   | 1.220 down |
| PD1261 | bifunctional phosphoribosyl-AMP<br>cyclohydrolase/phosphoribosyl-ATP pyrophosphatase<br>protein            | 1.044 up   | 1.033 down | 1.056 down | 1.011 up   | 1.011 down | 1.022 up   |
| PD1262 | imidazole glycerol phosphate synthase subunit HisF                                                         | 1.003 up   | 1.036 down | 1.065 down | 1.032 down | 1.061 down | 1.027 up   |
| PD1263 | 1-(5-phosphoribosyl)-5-[(5-<br>phosphoribosylamino)methylideneamino] imidazole-4-<br>carboxamide isomerase | 1.089 up   | 1.114 down | 1.042 down | 1.022 down | 1.044 up   | 1.068 down |
| PD1264 | imidazole glycerol phosphate synthase subunit HisH                                                         | 1.224 down | 1.258 down | 1.019 down | 1.540 down | 1.247 down | 1.234 down |
| PD1265 | imidazole glycerol-phosphate dehydratase/histidinol<br>phosphatase                                         | 1.181 down | 1.273 up   | 1.101 up   | 1.078 up   | 1.072 down | 1.155 up   |
| PD1266 | histidinol-phosphate aminotransferase                                                                      | 1.001 up   | 1.204 down | 1.111 down | 1.202 down | 1.110 down | 1.082 down |
| PD1267 | histidinol dehydrogenase                                                                                   | 1.136 down | 1.007 down | 1.237 up   | 1.144 down | 1.088 up   | 1.246 down |
| PD1268 | ATP phosphoribosyltransferase                                                                              | 1.029 down | 1.194 up   | 1.214 up   | 1.160 up   | 1.178 up   | 1.016 down |
| PD1269 | hypothetical protein                                                                                       | 1.090 down | 1.329 down | none       | 1.448 down | 1.089 down | 1.329 down |
| PD1270 | histidyl-tRNA synthetase                                                                                   | 1.166 up   | 1.118 down | 1.262 down | 1.043 up   | 1.082 down | 1.129 up   |
| PD1271 | threonine synthase                                                                                         | 1.124 down | 1.138 down | 1.049 down | 1.280 down | 1.180 down | 1.084 down |
| PD1272 | homoserine kinase                                                                                          | 1.018 down | 1.309 down | 1.093 down | 1.333 down | 1.113 down | 1.197 down |
| PD1273 | aspartokinase                                                                                              | 1.119 down | 1.015 down | 1.153 up   | 1.137 down | 1.030 up   | 1.171 down |
| PD1274 | aspartate carbamoyltransferase catalytic subunit                                                           | 1.151 up   | 1.309 down | 1.263 down | 1.137 down | 1.096 down | 1.036 down |

|        |                                                      |            |            |            |            |            |            |
|--------|------------------------------------------------------|------------|------------|------------|------------|------------|------------|
| PD1275 | Holliday junction resolvase-like protein             | 1.010 up   | 1.398 down | 1.608 down | 1.384 down | 1.592 down | 1.150 up   |
| PD1276 | hypothetical protein                                 | 1.112 up   | 1.012 down | 1.004 up   | 1.098 up   | 1.117 up   | 1.016 down |
| PD1277 | penicillin-binding protein 6 precursor               | 1.032 up   | 1.134 down | 1.254 down | 1.098 down | 1.214 down | 1.105 up   |
| PD1278 | catalase/peroxidase                                  | 1.203 up   | 1.244 down | 1.099 down | 1.034 down | 1.094 up   | 1.132 down |
| PD1279 | DnaJ protein                                         | 1.435 up   | 1.560 down | 1.238 down | 1.087 down | 1.158 up   | 1.259 down |
| PD1280 | low molecular weight heat shock protein              | 1.111 down | 1.192 up   | 1.072 up   | 1.072 up   | 1.036 down | 1.111 up   |
| PD1281 | bifunctional penicillin-binding protein 1C precursor | 1.023 down | 1.036 down | 1.050 up   | 1.061 down | 1.026 up   | 1.089 down |
| PD1282 | hypothetical protein                                 | 1.018 up   | 1.049 up   | 1.062 down | 1.068 up   | 1.042 down | 1.114 up   |
| PD1283 | TonB-dependent receptor                              | 1.131 down | 1.187 down | 1.068 up   | 1.344 down | 1.058 down | 1.269 down |
| PD1284 | RNA polymerase sigma-70 factor                       | 1.029 down | 1.100 up   | 1.214 up   | 1.069 up   | 1.180 up   | 1.103 down |
| PD1285 | hypothetical protein                                 | 1.175 down | 1.324 down | 1.228 down | 1.556 down | 1.443 down | 1.078 down |
| PD1286 | periplasmic protease                                 | 1.098 down | 1.105 up   | 1.004 down | 1.006 up   | 1.103 down | 1.110 up   |
| PD1287 | GTP-binding protein LepA                             | 1.266 down | 1.026 down | 1.310 up   | 1.299 down | 1.034 up   | 1.345 down |
| PD1288 | signal peptidase I                                   | 1.073 up   | 1.072 down | 1.035 up   | 1.001 up   | 1.111 up   | 1.109 down |
| PD1289 | hypothetical protein                                 | 1.046 up   | 1.166 down | 1.016 down | 1.113 down | 1.029 up   | 1.146 down |
| PD1290 | ribonuclease III                                     | 1.249 up   | 1.177 down | 1.305 down | 1.060 up   | 1.044 down | 1.108 up   |
| PD1291 | GTP-binding protein Era                              | 1.530 down | 1.332 up   | 1.350 down | 1.148 down | 2.066 down | 1.798 up   |
| PD1292 | DNA repair protein RecO                              | 1.252 up   | 1.457 down | 1.360 down | 1.163 down | 1.085 down | 1.071 down |
| PD1293 | 1-deoxy-D-xylulose-5-phosphate synthase              | 1.176 up   | 1.470 down | 1.536 down | 1.249 down | 1.305 down | 1.044 up   |
| PD1294 | acetate permease                                     | 1.074 up   | 1.168 down | 1.103 down | 1.087 down | 1.026 down | 1.059 down |

|        |                                                                        |            |            |            |            |            |            |
|--------|------------------------------------------------------------------------|------------|------------|------------|------------|------------|------------|
| PD1295 | hypothetical protein                                                   | 1.307 up   | 1.078 down | 1.071 down | 1.212 up   | 1.220 up   | 1.006 down |
| PD1296 | acetyl-coenzyme A synthetase                                           | 1.046 down | 1.048 down | 1.038 down | 1.097 down | 1.086 down | 1.010 down |
| PD1297 | hypothetical protein                                                   | 1.188 down | 1.005 up   | 1.062 up   | 1.181 down | 1.118 down | 1.056 down |
| PD1298 | hypothetical protein                                                   | 1.205 up   | 1.298 down | 1.128 up   | 1.076 down | 1.360 up   | 1.464 down |
| PD1299 | hypothetical protein                                                   | 1.053 down | 1.021 down | 1.040 down | 1.076 down | 1.096 down | 1.018 up   |
| PD1300 | alanyl dipeptidyl peptidase                                            | 1.115 up   | 1.213 up   | 1.080 up   | 1.354 up   | 1.205 up   | 1.122 up   |
| PD1301 | oligopeptide transporter                                               | 1.028 up   | 1.107 up   | 1.084 down | 1.138 up   | 1.054 down | 1.201 up   |
| PD1302 | glycerol-3-phosphate dehydrogenase                                     | 1.107 down | 1.159 down | 1.078 up   | 1.284 down | 1.026 down | 1.250 down |
| PD1303 | glycerol uptake facilitator protein                                    | 1.066 down | 1.053 down | 1.240 down | 1.123 down | 1.323 down | 1.177 up   |
| PD1304 | glycerol kinase                                                        | 1.016 up   | 1.062 up   | 1.056 up   | 1.079 up   | 1.072 up   | 1.005 up   |
| PD1305 | 3-alpha-hydroxysteroid dehydrogenase                                   | 1.041 down | 1.043 down | 1.116 down | 1.086 down | 1.162 down | 1.070 up   |
| PD1306 | hypothetical protein                                                   | 1.002 up   | 1.262 down | 1.066 down | 1.259 down | 1.064 down | 1.183 down |
| PD1307 | hypothetical protein                                                   | 1.420 up   | 1.717 down | 1.351 down | 1.208 down | 1.051 up   | 1.270 down |
| PD1308 | 5-methyltetrahydropteroyltriglutamate-- homocysteine methyltransferase | 1.305 down | 1.042 up   | 1.152 up   | 1.252 down | 1.132 down | 1.105 down |
| PD1309 | hypothetical protein                                                   | 1.287 up   | 1.579 down | 1.381 down | 1.226 down | 1.073 down | 1.142 down |
| PD1310 | pyrazinamidase/nicotinamidase                                          | 1.021 down | 1.250 up   | 1.093 up   | 1.223 up   | 1.070 up   | 1.143 up   |
| PD1311 | peptide synthase                                                       | 1.114 up   | 1.016 up   | 1.034 down | 1.132 up   | 1.077 up   | 1.051 up   |
| PD1312 | hypothetical protein                                                   | 1.182 up   | 1.069 down | 1.301 down | 1.105 up   | 1.101 down | 1.217 up   |
| PD1313 | dolichol-phosphate mannosyltransferase                                 | 1.134 up   | 1.044 down | 1.265 up   | 1.086 up   | 1.435 up   | 1.321 down |
| PD1314 | nucleotide sugar epimerase                                             | 1.313 up   | 1.333 down | 1.297 down | 1.015 down | 1.012 up   | 1.028 down |

|        |                                                                    |            |            |            |            |            |            |
|--------|--------------------------------------------------------------------|------------|------------|------------|------------|------------|------------|
| PD1315 | chromosome partitioning protein                                    | 1.061 up   | 1.080 down | 1.040 down | 1.018 down | 1.019 up   | 1.038 down |
| PD1316 | chromosome partitioning protein                                    | 1.074 down | 1.023 up   | 1.020 down | 1.050 down | 1.096 down | 1.044 up   |
| PD1317 | hypothetical protein                                               | 1.046 up   | 1.073 down | 1.078 down | 1.025 down | 1.030 down | 1.004 up   |
| PD1318 | seryl-tRNA synthetase                                              | 1.187 down | 1.355 up   | 1.166 up   | 1.141 up   | 1.018 down | 1.162 up   |
| PD1319 | TonB protein                                                       | 1.087 up   | 1.212 down | 1.236 down | 1.114 down | 1.136 down | 1.020 up   |
| PD1321 | hypothetical protein                                               | 1.016 up   | 1.603 up   | 1.226 up   | 1.630 up   | 1.246 up   | 1.308 up   |
| PD1322 | phage-related DNA polymerase                                       | 1.247 up   | 1.280 down | 1.500 down | 1.026 down | 1.202 down | 1.171 up   |
| PD1323 | phage-related lysozyme                                             | 1.124 up   | 1.283 up   | 1.022 up   | 1.443 up   | 1.149 up   | 1.255 up   |
| PD1324 | site-specific DNA-methyltransferase                                | 1.020 down | 1.082 up   | 1.044 down | 1.060 up   | 1.066 down | 1.131 up   |
| PD1325 | excinuclease ABC subunit C                                         | 1.063 down | 1.017 up   | 1.173 up   | 1.045 down | 1.103 up   | 1.153 down |
| PD1326 | CDP-diacylglycerol-glycerol-3- phosphate 3-phosphatidyltransferase | 1.020 down | 1.030 down | 1.116 up   | 1.052 down | 1.093 up   | 1.150 down |
| PD1328 | hypothetical protein                                               | 1.119 up   | 1.547 up   | 2.771 up   | 1.732 up   | 3.102 up   | 1.790 down |
| PD1329 | hypothetical protein                                               | 1.038 down | 1.260 down | 1.189 down | 1.309 down | 1.235 down | 1.059 down |
| PD1330 | hypothetical protein                                               | 1.284 up   | 1.375 down | 1.228 down | 1.070 down | 1.045 up   | 1.119 down |
| PD1331 | delta-aminolevulinic acid dehydratase                              | 1.021 down | 1.106 up   | 1.056 up   | 1.083 up   | 1.035 up   | 1.046 up   |
| PD1332 | hypothetical protein                                               | 1.126 up   | 1.205 down | 1.162 up   | 1.069 down | 1.309 up   | 1.400 down |
| PD1333 | IS1327 transposase                                                 | 1.123 up   | 1.263 down | 1.610 down | 1.124 down | 1.433 down | 1.275 up   |
| PD1334 | hypothetical protein                                               | 1.040 down | 1.006 up   | 1.033 up   | 1.033 down | 1.007 down | 1.026 down |
| PD1335 | glutamate-1-semialdehyde aminotransferase                          | 1.058 up   | 1.280 down | 1.105 down | 1.209 down | 1.044 down | 1.158 down |
| PD1336 | polysaccharide export protein                                      | 1.012 up   | 1.514 up   | 1.436 up   | 1.532 up   | 1.454 up   | 1.105 down |



|        |                                                          |            |            |            |            |            |            |
|--------|----------------------------------------------------------|------------|------------|------------|------------|------------|------------|
| PD1337 | 3-deoxy-manno-octulosonate cytidyltransferase            | 1.260 up   | 1.107 down | 1.339 down | 1.137 up   | 1.062 down | 1.208 up   |
| PD1338 | low molecular weight phosphotyrosine protein phosphatase | 1.026 up   | 1.073 up   | 1.024 down | 1.101 up   | 1.002 up   | 1.099 up   |
| PD1339 | DNA methylase                                            | 1.115 up   | 1.024 up   | 1.020 up   | 1.142 up   | 1.138 up   | 1.003 up   |
| PD1340 | proteic killer suppression protein                       | 1.100 up   | 1.003 down | 1.090 down | 1.096 up   | 1.009 up   | 1.086 up   |
| PD1341 | virulence-associated protein                             | 1.057 down | 1.673 down | 1.230 down | 1.770 down | 1.301 down | 1.360 down |
| PD1342 | HicB-related protein                                     | 1.180 up   | 1.094 down | 1.193 up   | 1.078 up   | 1.408 up   | 1.306 down |
| PD1343 | HicA-related protein                                     | 1.069 up   | 1.506 down | 1.437 down | 1.408 down | 1.343 down | 1.048 down |
| PD1344 | hypothetical protein                                     | 1.031 up   | 1.581 up   | 1.202 up   | 1.632 up   | 1.240 up   | 1.315 up   |
| PD1345 | hypothetical protein                                     | none       | 1.080 down | 1.032 up   | 1.079 down | 1.033 up   | 1.115 down |
| PD1346 | hypothetical protein                                     | 1.020 up   | 1.131 up   | 1.244 up   | 1.155 up   | 1.270 up   | 1.099 down |
| PD1347 | hypothetical protein                                     | 1.065 up   | 1.327 down | 1.136 up   | 1.245 down | 1.210 up   | 1.507 down |
| PD1348 | conjugal transfer protein                                | 1.044 down | 1.784 up   | 1.103 up   | 1.707 up   | 1.056 up   | 1.617 up   |
| PD1349 | hypothetical protein                                     | 1.147 down | 1.140 down | 1.079 down | 1.308 down | 1.238 down | 1.056 down |
| PD1350 | conjugal transfer protein                                | 1.318 up   | 1.213 up   | 1.298 up   | 1.600 up   | 1.712 up   | 1.069 down |
| PD1351 | hypothetical protein                                     | 1.390 down | 1.040 down | 1.162 up   | 1.446 down | 1.196 down | 1.209 down |
| PD1352 | hypothetical protein                                     | 1.283 up   | 1.167 down | 1.119 down | 1.099 up   | 1.147 up   | 1.043 down |
| PD1353 | hypothetical protein                                     | 1.134 down | 1.162 down | 1.133 down | 1.318 down | 1.286 down | 1.025 down |
| PD1354 | hypothetical protein                                     | 1.028 up   | 1.423 down | 1.044 down | 1.384 down | 1.016 down | 1.362 down |
| PD1355 | hypothetical protein                                     | 1.019 down | 1.340 down | 1.008 up   | 1.366 down | 1.010 down | 1.351 down |
| PD1356 | 3-phosphoshikimate 1-carboxyvinyltransferase             | 1.055 up   | 1.012 up   | 1.009 down | 1.068 up   | 1.045 up   | 1.021 up   |

|        |                                            |            |            |            |            |            |            |
|--------|--------------------------------------------|------------|------------|------------|------------|------------|------------|
| PD1357 | P-protein                                  | 1.134 down | 1.127 down | 1.018 down | 1.279 down | 1.155 down | 1.107 down |
| PD1358 | phosphoserine aminotransferase             | 1.022 down | 1.077 up   | 1.237 up   | 1.054 up   | 1.210 up   | 1.148 down |
| PD1359 | TonB protein                               | 1.167 down | 1.009 down | 1.019 down | 1.178 down | 1.190 down | 1.010 up   |
| PD1360 | ABC transporter sodium permease            | 1.023 down | 1.108 down | 1.115 up   | 1.135 down | 1.089 up   | 1.236 down |
| PD1361 | sodium ABC transporter ATP-binding protein | 1.040 down | none       | 1.042 up   | 1.040 down | 1.002 up   | 1.042 down |
| PD1362 | proteinase                                 | 1.023 down | 1.043 down | 1.023 down | 1.067 down | 1.047 down | 1.019 down |
| PD1363 | dihydrofolate reductase type III           | 1.021 down | 1.310 down | 1.000 down | 1.338 down | 1.021 down | 1.309 down |
| PD1364 | thymidylate synthase                       | 1.118 up   | 1.224 down | 1.292 down | 1.094 down | 1.155 down | 1.055 up   |
| PD1365 | prolipoprotein diacylglyceryl transferase  | 1.023 down | 1.025 up   | 1.031 up   | 1.002 up   | 1.007 up   | 1.005 down |
| PD1366 | diacylglycerol kinase                      | 1.086 down | 1.158 down | 1.027 up   | 1.258 down | 1.056 down | 1.191 down |
| PD1367 | two-component system, regulatory protein   | 1.430 up   | 1.194 down | 1.305 down | 1.197 up   | 1.096 up   | 1.092 up   |
| PD1368 | prephenate dehydrogenase                   | 1.083 up   | 1.106 down | 1.091 down | 1.020 down | 1.007 down | 1.013 down |
| PD1369 | DnaJ protein                               | 1.067 down | 1.132 down | 1.005 up   | 1.209 down | 1.061 down | 1.138 down |
| PD1370 | molecular chaperone DnaK                   | 1.101 up   | 1.091 down | 1.053 up   | 1.009 up   | 1.161 up   | 1.150 down |
| PD1371 | heat shock protein GrpE                    | 1.220 up   | 1.323 down | 1.589 down | 1.084 down | 1.301 down | 1.200 up   |
| PD1372 | heat-inducible transcription repressor     | 1.150 up   | 1.222 down | 1.217 down | 1.062 down | 1.057 down | 1.003 down |
| PD1373 | recombination protein N                    | 1.114 down | 1.108 up   | 1.041 up   | 1.004 down | 1.069 down | 1.064 up   |
| PD1374 | ferric uptake regulator                    | 1.005 down | 1.026 up   | 1.066 up   | 1.020 up   | 1.060 up   | 1.038 down |
| PD1375 | outer membrane protein                     | 1.117 down | 1.236 down | 1.259 down | 1.380 down | 1.406 down | 1.018 up   |
| PD1376 | hypothetical protein                       | 1.073 up   | 1.240 up   | 1.000 down | 1.332 up   | 1.073 up   | 1.241 up   |

|        |                                                |            |            |            |            |            |            |
|--------|------------------------------------------------|------------|------------|------------|------------|------------|------------|
| PD1377 | hypothetical protein                           | 1.121 down | 1.353 down | 1.026 down | 1.518 down | 1.151 down | 1.318 down |
| PD1378 | SsrA-binding protein                           | 1.018 down | 1.094 up   | 1.074 down | 1.074 up   | 1.093 down | 1.175 up   |
| PD1379 | hypothetical protein                           | 1.044 up   | 1.009 up   | 1.241 up   | 1.054 up   | 1.296 up   | 1.229 down |
| PD1380 | cold shock protein                             | 1.357 up   | 1.088 down | 1.132 up   | 1.246 up   | 1.537 up   | 1.233 down |
| PD1381 | purine nucleoside phosphorylase                | 1.102 up   | 1.300 up   | 1.059 down | 1.434 up   | 1.040 up   | 1.378 up   |
| PD1382 | hypoxanthine-guanine phosphoribosyltransferase | 1.085 down | 1.146 down | 1.004 down | 1.244 down | 1.090 down | 1.141 down |
| PD1383 | beta-hexosaminidase                            | 1.097 down | 1.066 up   | 1.271 down | 1.029 down | 1.395 down | 1.355 up   |
| PD1384 | hypothetical protein                           | 1.144 down | 1.048 down | 1.021 up   | 1.199 down | 1.119 down | 1.070 down |
| PD1385 | 23S rRNA (uracil-5-)-methyltransferase         | 1.228 up   | 1.006 up   | 1.007 down | 1.235 up   | 1.219 up   | 1.013 up   |
| PD1386 | response regulator                             | 1.211 down | 1.067 down | 1.210 down | 1.293 down | 1.466 down | 1.134 up   |
| PD1387 | GumM protein                                   | 1.079 up   | 1.097 up   | 1.240 up   | 1.184 up   | 1.338 up   | 1.129 down |
| PD1388 | GumK protein                                   | 1.069 up   | 1.132 down | 1.110 down | 1.058 down | 1.037 down | 1.020 down |
| PD1389 | GumJ protein                                   | 1.274 up   | 1.194 up   | 1.153 up   | 1.522 up   | 1.471 up   | 1.035 up   |
| PD1390 | hypothetical protein                           | 1.050 up   | 1.075 up   | 1.140 up   | 1.129 up   | 1.198 up   | 1.060 down |
| PD1391 | GumH protein                                   | 1.026 up   | 1.486 up   | 1.326 up   | 1.524 up   | 1.360 up   | 1.120 up   |
| PD1392 | GumF protein                                   | 1.010 down | 1.127 down | 1.027 up   | 1.139 down | 1.016 up   | 1.158 down |
| PD1393 | GumE protein                                   | 1.012 down | 1.001 up   | 1.327 down | 1.011 down | 1.343 down | 1.328 up   |
| PD1394 | GumD protein                                   | 1.092 up   | 1.340 up   | 1.222 up   | 1.463 up   | 1.334 up   | 1.096 up   |
| PD1395 | GumC protein                                   | 1.117 up   | 1.291 up   | 1.243 up   | 1.442 up   | 1.388 up   | 1.038 up   |
| PD1396 | GumB protein                                   | 1.196 up   | 1.233 up   | 1.108 up   | 1.475 up   | 1.325 up   | 1.112 up   |

|        |                                                     |            |            |            |            |            |            |
|--------|-----------------------------------------------------|------------|------------|------------|------------|------------|------------|
| PD1397 | 3-isopropylmalate dehydrogenase                     | 1.070 up   | 1.021 up   | 1.100 up   | 1.093 up   | 1.177 up   | 1.077 down |
| PD1398 | isopropylmalate isomerase small subunit             | 1.044 up   | 1.115 down | 1.059 down | 1.067 down | 1.013 down | 1.052 down |
| PD1399 | isopropylmalate isomerase large subunit             | 1.236 up   | 1.049 up   | 1.078 down | 1.297 up   | 1.145 up   | 1.132 up   |
| PD1400 | hypothetical protein                                | 1.140 up   | 1.189 down | 1.047 down | 1.042 down | 1.088 up   | 1.135 down |
| PD1401 | hypothetical protein                                | 1.154 up   | 1.089 down | 1.021 up   | 1.059 up   | 1.179 up   | 1.112 down |
| PD1402 | membrane fusion protein precursor                   | 1.029 down | 1.122 up   | 1.012 up   | 1.089 up   | 1.017 down | 1.108 up   |
| PD1403 | acriflavin resistance protein D                     | 1.026 up   | 1.063 up   | 1.167 down | 1.091 up   | 1.137 down | 1.241 up   |
| PD1404 | acriflavin resistance protein                       | 1.205 down | 1.428 down | 1.133 down | 1.722 down | 1.366 down | 1.260 down |
| PD1405 | hypothetical protein                                | 1.092 up   | 1.161 down | 1.101 down | 1.062 down | 1.007 down | 1.054 down |
| PD1406 | alcohol dehydrogenase                               | 1.170 up   | 1.098 up   | 1.208 down | 1.285 up   | 1.032 down | 1.327 up   |
| PD1407 | hypothetical protein                                | 1.129 down | 1.312 down | 1.381 down | 1.482 down | 1.560 down | 1.052 up   |
| PD1408 | autolytic lysozyme                                  | 1.584 up   | 1.119 up   | 1.104 down | 1.773 up   | 1.434 up   | 1.236 up   |
| PD1409 | glutaredoxin-like protein                           | 1.299 up   | 1.199 down | 1.121 down | 1.083 up   | 1.158 up   | 1.069 down |
| PD1410 | acetylxlanyl esterase                               | 1.100 down | 1.050 up   | 1.088 down | 1.046 down | 1.197 down | 1.143 up   |
| PD1411 | aspartate aminotransferase                          | 1.086 up   | 1.097 up   | 1.219 up   | 1.192 up   | 1.325 up   | 1.111 down |
| PD1412 | toxin secretion ABC transporter ATP-binding protein | 1.088 down | 1.645 down | 1.268 down | 1.791 down | 1.381 down | 1.296 down |
| PD1413 | hemolysin secretion protein D                       | 1.364 down | 1.038 up   | 1.092 down | 1.313 down | 1.490 down | 1.134 up   |
| PD1414 | hypothetical protein                                | 1.131 up   | 1.067 up   | 1.066 up   | 1.207 up   | 1.206 up   | none       |
| PD1415 | hypothetical protein                                | 1.118 up   | 1.066 down | 1.253 down | 1.048 up   | 1.120 down | 1.175 up   |
| PD1416 | hypothetical protein                                | 1.164 up   | 1.288 down | 1.201 down | 1.105 down | 1.031 down | 1.072 down |

|        |                                                    |            |            |            |            |            |            |
|--------|----------------------------------------------------|------------|------------|------------|------------|------------|------------|
| PD1417 | hypothetical protein                               | 1.370 up   | 1.038 up   | 1.224 down | 1.423 up   | 1.119 up   | 1.272 up   |
| PD1418 | hypothetical protein                               | 1.074 up   | 2.018 down | 1.199 down | 1.878 down | 1.116 down | 1.682 down |
| PD1419 | hypothetical protein                               | 1.348 up   | 1.505 up   | 1.012 down | 2.029 up   | 1.332 up   | 1.523 up   |
| PD1420 | hypothetical protein                               | 1.009 up   | 1.256 down | 1.038 down | 1.245 down | 1.028 down | 1.210 down |
| PD1421 | hypothetical protein                               | 1.281 up   | 1.402 up   | 1.154 down | 1.796 up   | 1.109 up   | 1.619 up   |
| PD1422 | hypothetical protein                               | 1.197 up   | 1.130 down | 1.116 down | 1.058 up   | 1.072 up   | 1.013 down |
| PD1423 | hypothetical protein                               | 1.116 up   | 1.449 down | 1.294 down | 1.297 down | 1.159 down | 1.119 down |
| PD1424 | hypothetical protein                               | 1.228 down | 1.741 down | 1.372 down | 2.140 down | 1.686 down | 1.268 down |
| PD1425 | hypothetical protein                               | 1.371 down | 2.119 up   | 1.330 up   | 1.545 up   | 1.030 down | 1.592 up   |
| PD1426 | hypothetical protein                               | 1.330 down | 1.301 down | 1.156 down | 1.730 down | 1.538 down | 1.124 down |
| PD1427 | bacteriocin                                        | 1.032 down | 1.014 up   | 1.054 up   | 1.017 down | 1.021 up   | 1.039 down |
| PD1428 | hypothetical protein                               | 1.115 up   | 1.343 down | 1.061 down | 1.204 down | 1.050 up   | 1.265 down |
| PD1429 | DNA helicase                                       | 1.259 up   | 1.154 up   | 1.089 up   | 1.454 up   | 1.371 up   | 1.059 up   |
| PD1431 | hypothetical protein                               | 1.142 up   | 1.023 down | 1.072 down | 1.115 up   | 1.064 up   | 1.047 up   |
| PD1434 | hypothetical protein                               | 1.117 up   | 1.232 down | 1.198 down | 1.103 down | 1.072 down | 1.028 down |
| PD1435 | 4-hydroxy-3-methylbut-2-enyl diphosphate reductase | 1.003 up   | 1.038 down | 1.180 down | 1.034 down | 1.177 down | 1.137 up   |
| PD1436 | signal peptidase II                                | 1.027 down | 1.026 down | 1.030 up   | 1.055 down | 1.002 up   | 1.057 down |
| PD1437 | isoleucyl-tRNA synthetase                          | 1.090 down | 1.313 down | 1.271 down | 1.431 down | 1.386 down | 1.032 down |
| PD1438 | hypothetical protein                               | 1.213 up   | 1.314 down | 1.283 down | 1.083 down | 1.057 down | 1.023 down |
| PD1439 | virulence factor                                   | 1.248 up   | 1.148 down | 1.206 down | 1.086 up   | 1.034 up   | 1.050 up   |

|        |                                                                                              |            |            |            |            |            |            |
|--------|----------------------------------------------------------------------------------------------|------------|------------|------------|------------|------------|------------|
| PD1440 | 30S ribosomal protein S20                                                                    | 1.152 down | 1.406 up   | 1.279 up   | 1.219 up   | 1.109 up   | 1.099 up   |
| PD1441 | GTP-binding protein                                                                          | 1.013 up   | 1.129 down | 1.315 down | 1.114 down | 1.297 down | 1.164 up   |
| PD1442 | 50S ribosomal protein L27                                                                    | 1.118 up   | 1.037 up   | 1.224 up   | 1.160 up   | 1.369 up   | 1.180 down |
| PD1443 | 50S ribosomal protein L21                                                                    | 1.006 down | 1.081 down | 1.053 up   | 1.088 down | 1.046 up   | 1.139 down |
| PD1444 | excinuclease ABC subunit A                                                                   | 1.005 down | 1.121 down | 1.092 down | 1.127 down | 1.099 down | 1.026 down |
| PD1445 | hypothetical protein                                                                         | 1.312 up   | 1.310 down | 1.529 down | 1.001 up   | 1.165 down | 1.167 up   |
| PD1446 | hypothetical protein                                                                         | 1.061 up   | 1.334 down | 1.154 down | 1.256 down | 1.087 down | 1.156 down |
| PD1447 | bifunctional GMP synthase/glutamine amidotransferase protein                                 | 1.047 up   | 1.095 down | 1.183 up   | 1.046 down | 1.239 up   | 1.296 down |
| PD1448 | inositol-5-monophosphate dehydrogenase                                                       | 1.037 down | 1.003 down | 1.113 up   | 1.041 down | 1.073 up   | 1.117 down |
| PD1449 | bifunctional methylenetetrahydrofolate dehydrogenase/methenyltetrahydrofolate cyclohydrolase | 1.039 up   | 1.099 down | 1.063 up   | 1.058 down | 1.104 up   | 1.169 down |
| PD1450 | UTP-glucose-1-phosphate uridylyltransferase                                                  | 1.040 up   | 1.084 up   | 1.198 down | 1.128 up   | 1.152 down | 1.299 up   |
| PD1451 | epimerase/dehydratase protein                                                                | 1.009 up   | 1.037 down | 1.051 up   | 1.027 down | 1.062 up   | 1.090 down |
| PD1452 | lipopolysaccharide core biosynthesis protein                                                 | 1.051 down | 1.111 down | 1.022 up   | 1.168 down | 1.028 down | 1.136 down |
| PD1453 | heat shock protein                                                                           | 1.085 up   | 1.371 down | 1.208 down | 1.262 down | 1.112 down | 1.135 down |
| PD1454 | hypothetical protein                                                                         | 1.010 up   | 1.427 down | 1.307 down | 1.412 down | 1.293 down | 1.092 down |
| PD1455 | integration host factor beta subunit                                                         | 1.069 up   | 1.372 down | 1.082 up   | 1.283 down | 1.157 up   | 1.485 down |
| PD1456 | 30S ribosomal protein S1                                                                     | 1.091 up   | 1.018 down | 1.106 down | 1.071 up   | 1.013 down | 1.086 up   |
| PD1457 | cytidylate kinase                                                                            | 1.083 down | 1.035 down | 1.237 down | 1.122 down | 1.341 down | 1.194 up   |
| PD1458 | 50S ribosomal protein L36                                                                    | 1.091 up   | 2.031 down | 1.384 down | 1.861 down | 1.268 down | 1.467 down |

|        |                                          |            |            |            |            |            |            |
|--------|------------------------------------------|------------|------------|------------|------------|------------|------------|
| PD1459 | hypothetical protein                     | 1.313 up   | 1.046 up   | 1.035 up   | 1.374 up   | 1.360 up   | 1.010 up   |
| PD1460 | hypothetical protein                     | 1.383 down | 1.028 down | 1.037 up   | 1.422 down | 1.332 down | 1.067 down |
| PD1461 | pantothenase                             | 1.004 down | 1.020 up   | 1.455 down | 1.015 up   | 1.462 down | 1.486 up   |
| PD1462 | pheromone shutdown protein               | 1.193 down | 1.012 up   | 1.124 down | 1.179 down | 1.342 down | 1.138 up   |
| PD1463 | hypothetical protein                     | 1.135 up   | 1.089 down | 1.030 up   | 1.042 up   | 1.169 up   | 1.122 down |
| PD1464 | ABC transporter sugar permease           | 1.173 up   | 1.201 down | 1.297 down | 1.023 down | 1.105 down | 1.079 up   |
| PD1465 | ABC transporter sugar permease           | 1.151 up   | 1.103 up   | 1.076 up   | 1.270 up   | 1.238 up   | 1.025 up   |
| PD1466 | ABC transporter sugar-binding protein    | 1.053 down | 1.113 up   | 1.208 up   | 1.056 up   | 1.146 up   | 1.085 down |
| PD1467 | hypothetical protein                     | 1.251 down | 1.062 up   | 1.013 up   | 1.178 down | 1.234 down | 1.048 up   |
| PD1468 | morphogene BolA protein                  | 1.056 up   | 1.046 down | 1.006 down | 1.009 up   | 1.048 up   | 1.039 down |
| PD1469 | hypothetical protein                     | 1.021 down | 1.154 up   | 1.004 down | 1.130 up   | 1.026 down | 1.160 up   |
| PD1470 | hypothetical protein                     | 1.001 down | 1.260 up   | 1.014 up   | 1.259 up   | 1.013 up   | 1.242 up   |
| PD1471 | pseudouridylate synthase                 | 1.389 down | 1.273 up   | 1.150 up   | 1.091 down | 1.207 down | 1.106 up   |
| PD1472 | hypothetical protein                     | 1.101 up   | 1.148 up   | 1.155 up   | 1.265 up   | 1.273 up   | 1.005 down |
| PD1473 | hydrolase                                | 1.173 up   | 1.011 up   | 1.121 up   | 1.187 up   | 1.317 up   | 1.108 down |
| PD1474 | putative aminotransferase                | 1.011 down | 1.188 up   | 1.120 up   | 1.174 up   | 1.106 up   | 1.060 up   |
| PD1475 | heme ABC transporter ATP-binding protein | 1.059 down | 1.097 down | 1.329 down | 1.162 down | 1.408 down | 1.211 up   |
| PD1476 | heme ABC transporter membrane protein    | 1.044 down | 1.351 down | 1.154 down | 1.411 down | 1.206 down | 1.170 down |
| PD1477 | heme ABC transporter membrane protein    | 1.018 down | 1.256 down | 1.190 down | 1.279 down | 1.213 down | 1.054 down |
| PD1478 | c-type cytochrome biogenesis protein     | 1.246 down | 1.048 down | 1.394 down | 1.307 down | 1.739 down | 1.330 up   |

|        |                                                  |            |            |            |            |            |            |
|--------|--------------------------------------------------|------------|------------|------------|------------|------------|------------|
| PD1479 | c-type cytochrome biogenesis membrane protein    | 1.032 up   | 1.266 down | 1.210 down | 1.227 down | 1.173 down | 1.046 down |
| PD1480 | c-type cytochrome biogenesis protein/thioredoxin | 1.137 down | 1.213 up   | 1.281 up   | 1.066 up   | 1.126 up   | 1.055 down |
| PD1481 | c-type cytochrome biogenesis protein             | 1.051 down | 1.108 down | 1.301 down | 1.164 down | 1.368 down | 1.174 up   |
| PD1482 | truncated C-type cytochrome biogenesis protein   | 1.138 up   | 1.506 down | 1.136 down | 1.322 down | 1.001 up   | 1.325 down |
| PD1483 | hypothetical protein                             | 1.144 down | 1.147 up   | 1.135 down | 1.003 up   | 1.299 down | 1.303 up   |
| PD1484 | homoserine O-acetyltransferase                   | 1.191 down | 1.031 down | 1.041 down | 1.228 down | 1.240 down | 1.009 up   |
| PD1485 | polygalacturonase precursor                      | 1.142 up   | 1.153 up   | 1.167 up   | 1.316 up   | 1.3327 up  | 1.023 down |
| PD1486 | hypothetical protein                             | 1.040 down | 1.148 up   | 1.224 up   | 1.103 up   | 1.177 up   | 1.066 down |
| PD1487 | phosphoglycolate phosphatase                     | 1.083 down | 1.020 down | 1.168 up   | 1.106 down | 1.078 up   | 1.193 down |
| PD1488 | 3-demethylubiquinone-9 3-methyltransferase       | 1.169 down | 1.224 down | 1.152 down | 1.431 down | 1.347 down | 1.062 down |
| PD1489 | N-ethylammelne chlorohydrolase                   | 1.412 down | 1.293 up   | 1.326 up   | 1.091 down | 1.064 down | 1.025 down |
| PD1490 | elongation factor P                              | 1.056 up   | 1.047 up   | 1.058 down | 1.106 up   | 1.001 down | 1.108 up   |
| PD1491 | hypothetical protein                             | 1.225 up   | 1.154 down | 1.003 up   | 1.061 up   | 1.229 up   | 1.158 down |
| PD1492 | tRNA/rRNA methyltransferase                      | 1.086 up   | 1.191 down | 1.034 down | 1.096 down | 1.050 up   | 1.151 down |
| PD1493 | extragenic supressor                             | 1.015 down | 1.036 up   | 1.064 down | 1.021 up   | 1.080 down | 1.103 up   |
| PD1494 | dithiobiotin synthetase                          | 1.161 up   | 1.016 down | 1.241 down | 1.143 up   | 1.069 down | 1.222 up   |
| PD1495 | phage-related integrase                          | 1.209 up   | 1.206 up   | 1.093 down | 1.459 up   | 1.105 up   | 1.319 up   |
| PD1497 | type IV fimbriae assembly protein                | 1.219 up   | 1.007 up   | 1.205 down | 1.228 up   | 1.011 up   | 1.214 up   |
| PD1498 | DNA polymerase III subunit delta                 | 1.005 down | 1.074 up   | 1.070 up   | 1.068 up   | 1.065 up   | 1.003 up   |
| PD1499 | hypothetical protein                             | 1.048 up   | 1.191 down | 1.062 up   | 1.136 down | 1.114 up   | 1.265 down |



|        |                                             |            |            |            |            |            |            |
|--------|---------------------------------------------|------------|------------|------------|------------|------------|------------|
| PD1500 | anthranilate synthase component I           | 1.205 up   | 1.178 down | 1.224 down | 1.022 up   | 1.015 down | 1.038 up   |
| PD1501 | 3-oxoacyl-(acyl carrier protein) synthase   | 1.131 up   | 1.060 down | 1.243 down | 1.066 up   | 1.098 down | 1.171 up   |
| PD1502 | acyl carrier protein                        | 1.527 up   | 2.634 up   | 1.445 up   | 4.022 up   | 2.207 up   | 1.822 up   |
| PD1503 | 3-ketoacyl-(acyl-carrier-protein) reductase | 1.011 up   | 1.100 up   | 1.315 up   | 1.113 up   | 1.330 up   | 1.195 down |
| PD1504 | acyl-carrier-protein S-malonyltransferase   | 1.170 up   | 1.197 up   | 1.020 up   | 1.401 up   | 1.194 up   | 1.173 up   |
| PD1505 | pyruvate dehydrogenase                      | 1.108 down | 1.084 up   | 1.084 down | 1.022 down | 1.202 down | 1.176 up   |
| PD1506 | hemolysin-type calcium binding protein      | 1.148 down | 1.228 down | 1.081 up   | 1.409 down | 1.061 down | 1.328 down |
| PD1507 | hypothetical protein                        | 1.041 down | 1.136 down | 1.318 down | 1.184 down | 1.373 down | 1.159 up   |
| PD1508 | hypothetical protein                        | 1.232 up   | 1.162 down | 1.113 down | 1.059 up   | 1.106 up   | 1.043 down |
| PD1509 | hypothetical protein                        | 1.154 up   | 1.037 down | 1.137 up   | 1.113 up   | 1.313 up   | 1.179 down |
| PD1510 | hypothetical protein                        | 1.336 up   | 1.086 down | 1.041 down | 1.229 up   | 1.282 up   | 1.043 down |
| PD1511 | hypothetical protein                        | 1.086 up   | 1.070 down | 1.002 down | 1.014 up   | 1.083 up   | 1.068 down |
| PD1512 | farnesyl-diphosphate synthase               | 1.175 down | 1.244 down | 1.035 down | 1.462 down | 1.217 down | 1.201 down |
| PD1513 | exodeoxyribonuclease VII small subunit      | 1.213 down | 1.332 up   | 1.127 down | 1.098 up   | 1.368 down | 1.502 up   |
| PD1514 | cell cycle protein                          | 1.078 down | 1.216 down | 1.254 down | 1.312 down | 1.353 down | 1.031 up   |
| PD1515 | alkaline phosphatase                        | 1.067 up   | 1.399 down | 1.248 down | 1.311 down | 1.170 down | 1.121 down |
| PD1516 | glutamate symport protein                   | 1.109 up   | 1.151 up   | 1.193 down | 1.277 up   | 1.076 down | 1.374 up   |
| PD1517 | hypothetical protein                        | 1.179 down | 1.041 down | 1.148 up   | 1.228 down | 1.026 down | 1.196 down |
| PD1518 | hypothetical protein                        | 1.017 up   | 1.104 up   | 1.112 up   | 1.123 up   | 1.131 up   | 1.007 down |
| PD1519 | peptidyl-prolyl cis-trans isomerase         | 1.389 up   | 1.115 up   | 1.159 down | 1.550 up   | 1.198 up   | 1.293 up   |

|        |                                               |            |            |            |            |            |            |
|--------|-----------------------------------------------|------------|------------|------------|------------|------------|------------|
| PD1520 | transport protein                             | 1.057 down | 1.112 up   | 1.220 up   | 1.052 up   | 1.154 up   | 1.097 down |
| PD1521 | integral membrane protein                     | 1.067 up   | 1.437 down | 1.606 down | 1.346 down | 1.504 down | 1.117 up   |
| PD1522 | hypothetical protein                          | 1.104 up   | 1.185 down | 1.070 up   | 1.073 down | 1.182 up   | 1.268 down |
| PD1523 | endonuclease III                              | 1.218 down | 1.140 up   | 1.511 up   | 1.067 down | 1.241 up   | 1.325 down |
| PD1524 | hypothetical protein                          | 1.451 down | 1.014 up   | 1.221 up   | 1.431 down | 1.188 down | 1.204 down |
| PD1525 | macrophage infectivity potentiator            | 1.021 up   | 1.079 down | 1.008 down | 1.056 down | 1.013 up   | 1.070 down |
| PD1527 | hypothetical protein                          | 1.108 up   | 1.182 up   | 1.070 down | 1.309 up   | 1.035 up   | 1.265 up   |
| PD1528 | hypothetical protein                          | 1.056 up   | 1.256 down | 1.221 down | 1.189 down | 1.155 down | 1.028 down |
| PD1529 | hypothetical protein                          | 1.280 up   | 1.157 down | 1.088 up   | 1.106 up   | 1.394 up   | 1.259 down |
| PD1530 | hypothetical protein                          | 1.091 up   | 1.168 up   | 1.009 down | 1.276 up   | 1.081 up   | 1.180 up   |
| PD1531 | hypothetical protein                          | 1.366 down | 1.052 down | 1.403 down | 1.437 down | 1.918 down | 1.334 up   |
| PD1532 | shikimate 5-dehydrogenase                     | 1.011 up   | 1.233 down | 1.017 down | 1.219 down | 1.006 down | 1.212 down |
| PD1533 | hypothetical protein                          | 1.328 up   | 1.212 down | 1.115 down | 1.095 up   | 1.190 up   | 1.086 down |
| PD1534 | phosphomethylpyrimidine kinase                | 1.026 up   | 1.051 down | 1.065 down | 1.024 down | 1.037 down | 1.013 up   |
| PD1535 | c-type cytochrome biogenesis protein          | 1.186 up   | 1.194 down | 1.130 down | 1.006 down | 1.049 up   | 1.057 down |
| PD1536 | periplasmic divalent cation tolerance protein | 1.098 up   | 1.087 down | 1.170 down | 1.010 up   | 1.065 down | 1.077 up   |
| PD1537 | co-chaperonin GroES                           | 1.038 up   | 1.008 down | 1.074 down | 1.029 up   | 1.034 down | 1.065 up   |
| PD1538 | chaperonin GroEL                              | 1.010 up   | 1.248 up   | 1.025 down | 1.261 up   | 1.014 down | 1.279 up   |
| PD1539 | hypothetical protein                          | 1.093 up   | 1.074 up   | 1.197 up   | 1.175 up   | 1.309 up   | 1.114 down |
| PD1540 | hypothetical protein                          | 1.306 up   | 1.752 down | 1.314 down | 1.342 down | 1.006 down | 1.333 down |

|        |                                                  |            |            |            |            |            |            |
|--------|--------------------------------------------------|------------|------------|------------|------------|------------|------------|
| PD1541 | hypothetical protein                             | 1.036 up   | 1.271 down | 1.029 down | 1.227 down | 1.006 up   | 1.235 down |
| PD1542 | dolichol-phosphate mannosyltransferase           | 1.030 up   | 1.093 up   | 1.033 down | 1.127 up   | 1.002 down | 1.130 up   |
| PD1543 | dTDP-glucose 4-6-dehydratase                     | 1.123 up   | 1.235 down | 1.176 down | 1.099 down | 1.047 down | 1.049 down |
| PD1544 | NDP-hexose epimerase/oxydoreductase              | 1.343 down | 1.148 down | 1.047 down | 1.543 down | 1.406 down | 1.096 down |
| PD1545 | GDP-mannose 4,6 dehydratase                      | 1.106 up   | 1.218 down | 1.080 down | 1.101 down | 1.023 up   | 1.127 down |
| PD1546 | mannosyltransferase                              | 1.035 up   | 1.008 down | 1.256 down | 1.026 up   | 1.213 down | 1.246 up   |
| PD1547 | hypothetical protein                             | 1.246 up   | 1.134 down | 1.161 down | 1.099 up   | 1.073 up   | 1.024 up   |
| PD1548 | cystathionine beta-synthase                      | 1.008 up   | 1.009 down | 1.235 down | none       | 1.224 down | 1.224 up   |
| PD1549 | UptF protein                                     | 1.354 up   | 1.958 up   | 1.551 up   | 2.652 up   | 2.101 up   | 1.262 up   |
| PD1550 | outer membrane protein UptE precursor            | 1.165 up   | 1.269 down | 1.086 down | 1.089 down | 1.072 up   | 1.168 down |
| PD1551 | outer membrane protein UptD precursor            | 1.270 up   | 1.378 down | 1.280 down | 1.085 down | 1.008 down | 1.076 down |
| PD1552 | TonB-dependent receptor                          | 1.005 up   | 1.071 down | 1.183 down | 1.065 down | 1.176 down | 1.104 up   |
| PD1553 | putative hydroxylase                             | 1.193 down | 1.116 down | 1.152 down | 1.332 down | 1.375 down | 1.032 up   |
| PD1554 | hypothetical protein                             | 1.075 down | 1.020 down | 1.082 down | 1.097 down | 1.165 down | 1.061 up   |
| PD1555 | hypothetical protein                             | 1.138 up   | 1.002 up   | 1.084 up   | 1.141 up   | 1.234 up   | 1.081 down |
| PD1556 | hypothetical protein                             | 1.262 down | 1.285 up   | 1.034 up   | 1.018 up   | 1.219 down | 1.242 up   |
| PD1557 | thiamine biosynthesis lipoprotein ApbE precursor | 1.379 down | 1.138 up   | 1.081 up   | 1.211 down | 1.274 down | 1.052 up   |
| PD1558 | DNA transport competence protein                 | 1.213 up   | 7.527 up   | 2.531 up   | 9.136 up   | 3.072 up   | 2.973 up   |
| PD1559 | hypothetical protein                             | 1.034 up   | 1.009 down | 1.001 up   | 1.024 up   | 1.036 up   | 1.011 down |
| PD1560 | nucleotidyl transferase                          | 1.098 down | 1.021 down | 1.149 down | 1.121 down | 1.263 down | 1.126 up   |

|        |                                             |            |            |            |            |            |            |
|--------|---------------------------------------------|------------|------------|------------|------------|------------|------------|
| PD1561 | hypothetical protein                        | 1.019 up   | 1.024 down | 1.317 down | 1.004 down | 1.292 down | 1.287 up   |
| PD1562 | permease                                    | 1.007 down | 1.046 down | 1.180 down | 1.055 down | 1.189 down | 1.127 up   |
| PD1563 | hypothetical protein                        | 1.039 down | 1.069 down | 1.282 down | 1.111 down | 1.332 down | 1.199 up   |
| PD1564 | phosphoribosylaminoimidazole synthetase     | 1.031 up   | 1.367 down | 1.618 down | 1.325 down | 1.569 down | 1.183 up   |
| PD1565 | hypothetical protein                        | 1.548 down | 1.052 up   | 1.344 down | 1.470 down | 2.082 down | 1.415 up   |
| PD1566 | phosphoribosylglycinamide formyltransferase | 1.294 down | 1.029 down | 1.110 up   | 1.332 down | 1.165 down | 1.143 down |
| PD1567 | hypothetical protein                        | 1.233 down | 1.073 down | 1.060 down | 1.324 down | 1.308 down | 1.012 down |
| PD1568 | hypothetical protein                        | 1.180 down | 1.251 up   | 1.152 up   | 1.060 up   | 1.024 down | 1.086 up   |
| PD1569 | thymidylate kinase                          | 1.235 up   | 1.109 up   | 1.070 up   | 1.371 up   | 1.322 up   | 1.036 up   |
| PD1570 | metallopeptidase                            | 1.132 down | 1.217 down | 1.179 down | 1.378 down | 1.334 down | 1.032 down |
| PD1571 | hypothetical protein                        | 1.141 down | 1.176 up   | 1.169 up   | 1.030 up   | 1.023 up   | 1.006 up   |
| PD1572 | 3-hydroxydecanoyl-ACP dehydratase           | 1.215 down | 1.108 up   | 1.281 up   | 1.095 down | 1.054 up   | 1.155 down |
| PD1573 | hypothetical protein                        | 1.004 down | 1.250 down | 1.213 down | 1.256 down | 1.218 down | 1.030 down |
| PD1574 | recombination associated protein            | 1.156 down | 1.569 down | 2.105 down | 1.814 down | 2.433 down | 1.341 up   |
| PD1575 | hypothetical protein                        | 1.263 down | 1.127 up   | 1.157 up   | 1.120 down | 1.091 down | 1.026 down |
| PD1576 | ferrochelatase                              | 1.063 down | 1.072 down | 1.267 down | 1.139 down | 1.347 down | 1.182 up   |
| PD1577 | hypothetical protein                        | 1.132 down | 1.049 up   | 1.032 up   | 1.079 down | 1.097 down | 1.016 up   |
| PD1578 | twin arginine translocase protein A         | 1.235 down | 1.414 up   | 1.116 up   | 1.144 up   | 1.107 down | 1.266 up   |
| PD1579 | sec-independent translocase                 | 1.019 down | 1.357 down | 1.154 down | 1.383 down | 1.176 down | 1.175 down |
| PD1580 | SEC-independent protein translocase         | 1.186 down | 1.219 down | 1.160 down | 1.446 down | 1.377 down | 1.050 down |

|        |                                       |            |            |            |            |            |            |
|--------|---------------------------------------|------------|------------|------------|------------|------------|------------|
| PD1581 | hypothetical protein                  | 1.236 up   | 1.224 down | 1.086 down | 1.009 up   | 1.138 up   | 1.127 down |
| PD1582 | glutamine amidotransferase            | 1.204 up   | 1.100 down | 1.150 down | 1.094 up   | 1.047 up   | 1.045 up   |
| PD1583 | hypothetical protein                  | 1.241 down | 1.000 down | 1.127 down | 1.242 down | 1.400 down | 1.126 up   |
| PD1584 | electron transfer protein azurin I    | 1.381 down | 1.370 up   | 1.300 up   | 1.007 down | 1.062 down | 1.054 up   |
| PD1585 | ribosome-associated GTPase            | 1.040 down | 1.251 up   | 1.139 up   | 1.201 up   | 1.094 up   | 1.098 up   |
| PD1586 | hypothetical protein                  | 1.124 up   | 1.013 up   | 1.026 down | 1.139 up   | 1.095 up   | 1.040 up   |
| PD1587 | hypothetical protein                  | 1.166 up   | 1.203 down | 1.120 down | 1.031 down | 1.041 up   | 1.074 down |
| PD1588 | hypothetical protein                  | 1.337 down | 1.240 up   | 1.160 up   | 1.078 down | 1.152 down | 1.068 up   |
| PD1589 | TonB-dependent receptor               | 1.132 up   | 1.040 up   | 1.156 down | 1.179 up   | 1.020 down | 1.203 up   |
| PD1590 | methionyl-tRNA synthetase             | 1.025 up   | 1.267 down | 1.159 down | 1.236 down | 1.130 down | 1.093 down |
| PD1591 | ferredoxin                            | 1.159 down | 1.167 down | 1.009 down | 1.353 down | 1.170 down | 1.156 down |
| PD1592 | hypothetical protein                  | 1.155 up   | 1.002 down | 1.189 down | 1.153 up   | 1.028 down | 1.186 up   |
| PD1593 | hypothetical protein                  | 1.005 down | 1.119 down | 1.075 down | 1.125 down | 1.081 down | 1.041 down |
| PD1594 | hypothetical protein                  | 1.006 down | 1.029 down | 1.043 up   | 1.036 down | 1.036 up   | 1.074 down |
| PD1595 | phage-related endolysin               | 1.210 down | 1.232 down | 1.004 up   | 1.491 down | 1.205 down | 1.237 down |
| PD1596 | hypothetical protein                  | 1.118 down | 1.031 down | 1.018 up   | 1.153 down | 1.098 down | 1.050 down |
| PD1597 | hypothetical protein                  | 1.129 down | 1.047 down | 1.232 down | 1.183 down | 1.393 down | 1.177 up   |
| PD1598 | phage-related terminase large subunit | 1.037 up   | 1.043 down | 1.067 down | 1.005 down | 1.029 down | 1.023 up   |
| PD1599 | hypothetical protein                  | 1.058 up   | 1.304 down | 1.284 down | 1.231 down | 1.213 down | 1.015 down |
| PD1600 | virulence-associated protein E        | 1.109 down | 1.254 up   | 1.382 up   | 1.130 up   | 1.245 up   | 1.101 down |

|        |                                         |            |            |            |            |            |            |
|--------|-----------------------------------------|------------|------------|------------|------------|------------|------------|
| PD1601 | hypothetical protein                    | 1.050 up   | 1.206 up   | 1.109 up   | 1.266 up   | 1.165 up   | 1.087 up   |
| PD1602 | hypothetical protein                    | 1.054 down | 1.071 down | 1.092 down | 1.129 down | 1.151 down | 1.019 up   |
| PD1603 | single-strand DNA-binding protein       | 1.111 up   | 1.459 up   | 1.255 down | 1.622 up   | 1.129 down | 1.833 up   |
| PD1604 | hypothetical protein                    | 1.054 up   | 1.050 down | 1.109 up   | 1.003 up   | 1.170 up   | 1.165 down |
| PD1606 | hypothetical protein                    | 1.068 up   | 1.075 up   | 1.069 down | 1.149 up   | 1.000 down | 1.150 up   |
| PD1607 | modification methylase NspV             | 1.012 down | 1.113 down | 1.094 up   | 1.127 down | 1.080 up   | 1.218 down |
| PD1608 | type II restriction enzyme NspV         | 1.016 up   | 1.173 down | 1.213 down | 1.154 down | 1.193 down | 1.033 up   |
| PD1610 | type IV pilin                           | 1.141 down | 1.074 down | 1.156 up   | 1.226 down | 1.013 up   | 1.242 down |
| PD1611 | fimbrial assembly protein               | 1.230 up   | 1.464 up   | 1.169 down | 1.800 up   | 1.051 up   | 1.714 up   |
| PD1612 | fimbrial assembly protein               | 1.123 down | 1.098 up   | 1.009 down | 1.023 down | 1.134 down | 1.108 up   |
| PD1613 | hypothetical protein                    | 1.138 up   | 1.521 up   | 1.254 up   | 1.732 up   | 1.428 up   | 1.212 up   |
| PD1614 | hypothetical protein                    | 1.197 down | 1.123 down | 1.154 down | 1.345 down | 1.382 down | 1.027 up   |
| PD1615 | hypothetical protein                    | 1.025 down | 1.002 down | 1.265 up   | 1.028 down | 1.234 up   | 1.268 down |
| PD1616 | hypothetical protein                    | 1.270 up   | 1.229 down | 1.028 up   | 1.033 up   | 1.306 up   | 1.263 down |
| PD1617 | hypothetical protein                    | 1.101 up   | 1.035 down | 1.074 down | 1.064 up   | 1.025 up   | 1.038 up   |
| PD1618 | molybdopterin biosynthesis protein MoeB | 1.126 down | 1.173 up   | 1.077 up   | 1.041 up   | 1.045 down | 1.088 up   |
| PD1619 | GTP-binding protein EngA                | 1.212 up   | 1.257 up   | 1.186 down | 1.524 up   | 1.022 up   | 1.490 up   |
| PD1620 | serine/threonine protein kinase         | 1.116 up   | 1.033 up   | 1.069 up   | 1.153 up   | 1.194 up   | 1.034 down |
| PD1621 | hypothetical protein                    | 1.160 up   | 1.083 up   | 1.119 up   | 1.257 up   | 1.298 up   | 1.032 down |
| PD1622 | hypothetical protein                    | 1.231 up   | 1.003 up   | 1.422 down | 1.236 up   | 1.154 down | 1.427 up   |

|        |                                             |            |            |            |            |            |            |
|--------|---------------------------------------------|------------|------------|------------|------------|------------|------------|
| PD1623 | hypothetical protein                        | 1.189 up   | 1.100 down | 1.066 up   | 1.080 up   | 1.268 up   | 1.174 down |
| PD1624 | hypothetical protein                        | 1.125 up   | 1.132 up   | 1.049 down | 1.274 up   | 1.072 up   | 1.188 up   |
| PD1625 | nucleoside diphosphate kinase               | 1.267 down | 1.145 up   | 1.105 down | 1.106 down | 1.401 down | 1.266 up   |
| PD1626 | glyceraldehyde-3-phosphate dehydrogenase    | 1.116 up   | 1.266 up   | 1.087 up   | 1.414 up   | 1.214 up   | 1.164 up   |
| PD1627 | adenylosuccinate synthetase                 | 1.032 down | 1.196 down | 1.146 down | 1.235 down | 1.183 down | 1.043 down |
| PD1628 | hypothetical protein                        | 1.071 up   | 1.046 up   | 1.220 down | 1.121 up   | 1.139 down | 1.276 up   |
| PD1629 | integral membrane proteinase                | 1.003 up   | 1.026 down | 1.060 up   | 1.022 down | 1.064 up   | 1.088 down |
| PD1630 | HflK protein                                | 1.020 up   | 1.042 down | 1.104 down | 1.021 down | 1.082 down | 1.059 up   |
| PD1631 | hypothetical protein                        | 1.161 down | 1.012 up   | 1.106 down | 1.147 down | 1.284 down | 1.119 up   |
| PD1632 | regulatory protein pilH family              | 1.189 down | 1.154 up   | 1.359 down | 1.029 down | 1.616 down | 1.570 up   |
| PD1633 | transmembrane signal peptide protein        | 1.122 up   | 1.024 up   | 1.026 up   | 1.150 up   | 1.152 up   | 1.001 down |
| PD1634 | DNA-binding protein                         | 1.019 up   | 1.163 up   | 1.098 up   | 1.186 up   | 1.120 up   | 1.059 up   |
| PD1635 | prolyl-tRNA synthetase                      | 1.034 up   | 1.029 up   | 1.055 down | 1.064 up   | 1.020 down | 1.086 up   |
| PD1636 | hypothetical protein                        | 1.374 up   | 1.103 up   | 1.151 down | 1.516 up   | 1.193 up   | 1.271 up   |
| PD1637 | phosphatidylserine synthase                 | 1.236 down | 1.011 down | 1.112 down | 1.250 down | 1.375 down | 1.100 up   |
| PD1638 | hypothetical protein                        | 1.000 down | 1.139 down | 1.355 down | 1.140 down | 1.357 down | 1.189 up   |
| PD1639 | ribosomal-protein-alanine acetyltransferase | 1.095 down | 1.280 down | 1.004 up   | 1.402 down | 1.090 down | 1.286 down |
| PD1640 | beta-glucosidase                            | 1.210 up   | 1.119 up   | 1.322 down | 1.355 up   | 1.092 down | 1.481 up   |
| PD1641 | hypothetical protein                        | 1.144 up   | 1.200 up   | 1.019 up   | 1.373 up   | 1.166 up   | 1.178 up   |
| PD1642 | dihydroneopterin aldolase                   | 1.034 up   | 1.047 down | 1.024 down | 1.012 down | 1.009 up   | 1.021 down |

|        |                                             |            |            |            |            |            |            |
|--------|---------------------------------------------|------------|------------|------------|------------|------------|------------|
| PD1643 | O-sialoglycoprotein endopeptidase           | 1.029 down | 1.106 down | 1.015 down | 1.138 down | 1.045 down | 1.088 down |
| PD1644 | 30S ribosomal protein S21                   | 1.017 up   | 1.520 up   | 1.291 up   | 1.547 up   | 1.314 up   | 1.177 up   |
| PD1645 | hypothetical protein                        | 1.142 up   | 1.033 up   | 1.040 down | 1.180 up   | 1.098 up   | 1.074 up   |
| PD1646 | ribonuclease BN                             | 1.130 down | 1.246 up   | 1.108 up   | 1.102 up   | 1.020 down | 1.124 up   |
| PD1647 | DNA primase                                 | 1.002 up   | 1.349 down | 1.107 down | 1.346 down | 1.104 down | 1.219 down |
| PD1648 | hypothetical protein                        | 1.242 up   | 1.057 up   | 1.091 up   | 1.314 up   | 1.357 up   | 1.032 down |
| PD1649 | DNA modification methylase                  | 1.027 up   | 1.112 up   | 1.120 up   | 1.142 up   | 1.151 up   | 1.007 down |
| PD1650 | tryptophanyl-tRNA synthetase                | 1.166 up   | 1.093 down | 1.105 down | 1.066 up   | 1.054 up   | 1.010 up   |
| PD1651 | exodeoxyribonuclease V alpha chain          | 1.347 up   | 1.031 down | 1.097 up   | 1.306 up   | 1.477 up   | 1.131 down |
| PD1652 | exodeoxyribonuclease V beta chain           | 1.064 up   | 1.452 down | 1.329 down | 1.365 down | 1.248 down | 1.093 down |
| PD1653 | exodeoxyribonuclease V gamma chain          | 1.022 down | 1.142 down | 1.099 down | 1.168 down | 1.123 down | 1.039 down |
| PD1654 | toluene tolerance protein                   | 1.045 up   | 1.068 up   | 1.059 down | 1.116 up   | 1.014 down | 1.132 up   |
| PD1655 | toluene tolerance protein                   | 1.160 down | 1.125 down | 1.019 down | 1.305 down | 1.183 down | 1.103 down |
| PD1656 | toluene tolerance protein                   | 1.202 down | 1.014 down | 1.034 down | 1.219 down | 1.243 down | 1.019 up   |
| PD1657 | toluene tolerance protein                   | 1.028 down | 1.021 up   | 1.142 down | 1.006 down | 1.174 down | 1.166 up   |
| PD1658 | hypothetical protein                        | 1.001 down | 1.162 down | 1.105 up   | 1.163 down | 1.104 up   | 1.285 down |
| PD1659 | lipoprotein precursor                       | 1.126 down | 1.078 down | 1.000 up   | 1.214 down | 1.125 down | 1.079 down |
| PD1660 | hypothetical protein                        | 1.177 down | 1.051 down | 1.035 down | 1.238 down | 1.219 down | 1.015 down |
| PD1661 | competence-induced protein                  | 1.093 up   | 1.399 up   | 1.006 up   | 1.530 up   | 1.100 up   | 1.390 up   |
| PD1662 | nitrate ABC transporter ATP-binding protein | 1.060 down | 1.045 down | 1.000 up   | 1.108 down | 1.059 down | 1.046 down |



|        |                                          |            |            |            |            |            |            |
|--------|------------------------------------------|------------|------------|------------|------------|------------|------------|
| PD1663 | ABC transporter nitrate permease         | 1.134 up   | 1.079 up   | 1.131 down | 1.225 up   | 1.002 up   | 1.221 up   |
| PD1664 | amino acid transporter                   | 1.048 down | 1.046 down | 1.012 up   | 1.097 down | 1.035 down | 1.059 down |
| PD1665 | hypothetical protein                     | 1.013 up   | 1.153 up   | 1.137 up   | 1.169 up   | 1.153 up   | 1.013 up   |
| PD1666 | export protein                           | 1.130 down | 1.216 up   | 1.035 down | 1.075 up   | 1.170 down | 1.258 up   |
| PD1667 | HesB-like protein                        | 1.260 down | 1.164 up   | 1.005 up   | 1.082 down | 1.253 down | 1.157 up   |
| PD1668 | hypothetical protein                     | 1.166 down | 1.070 down | 1.133 down | 1.249 down | 1.322 down | 1.058 up   |
| PD1669 | hypothetical protein                     | 1.374 up   | 1.082 down | 1.170 down | 1.270 up   | 1.174 up   | 1.081 up   |
| PD1670 | hypothetical protein                     | 1.054 down | 1.168 down | 1.026 up   | 1.232 down | 1.027 down | 1.199 down |
| PD1671 | two-component, response regulator        | 1.054 down | 1.394 down | 1.459 down | 1.470 down | 1.538 down | 1.046 up   |
| PD1672 | bacterioferritin                         | 1.206 up   | 1.118 up   | 1.029 up   | 1.349 up   | 1.241 up   | 1.087 up   |
| PD1673 | bacterioferritin                         | 1.139 down | 1.079 down | 1.040 down | 1.230 down | 1.184 down | 1.038 down |
| PD1674 | dinucleoside polyphosphate hydrolase     | 1.166 down | 1.355 up   | 1.655 up   | 1.161 up   | 1.418 up   | 1.221 down |
| PD1677 | S-adenosylmethionine synthetase          | 1.066 down | 1.068 down | 1.117 down | 1.139 down | 1.192 down | 1.046 up   |
| PD1678 | two-component system, sensor protein     | 1.129 up   | 1.077 down | 1.006 down | 1.048 up   | 1.122 up   | 1.071 down |
| PD1679 | two-component system, regulatory protein | 1.101 up   | 1.159 up   | 1.041 down | 1.277 up   | 1.057 up   | 1.207 up   |
| PD1680 | hypothetical protein                     | 1.196 up   | 1.071 up   | 1.050 up   | 1.282 up   | 1.256 up   | 1.020 up   |
| PD1681 | hypothetical protein                     | 1.061 down | 1.089 up   | 1.097 up   | 1.026 up   | 1.034 up   | 1.007 down |
| PD1682 | outer membrane hemin receptor            | 1.158 down | 1.049 up   | 1.122 up   | 1.104 down | 1.032 down | 1.069 down |
| PD1683 | hypothetical protein                     | 1.114 up   | 1.049 up   | 1.199 down | 1.169 up   | 1.076 down | 1.258 up   |
| PD1684 | hypothetical protein                     | 1.044 down | 1.185 down | 1.121 up   | 1.238 down | 1.073 up   | 1.328 down |

|        |                                              |            |            |            |            |            |            |
|--------|----------------------------------------------|------------|------------|------------|------------|------------|------------|
| PD1685 | ATP-dependent Clp protease subunit           | 1.012 down | 1.076 down | 1.067 up   | 1.090 down | 1.053 up   | 1.148 down |
| PD1686 | rubredoxin                                   | 1.148 up   | 1.034 up   | 1.017 up   | 1.187 up   | 1.168 up   | 1.016 up   |
| PD1687 | thiamine-phosphate pyrophosphorylase         | 1.257 down | 1.004 up   | 1.084 down | 1.251 down | 1.363 down | 1.089 up   |
| PD1688 | cytochrome P450-like enzyme                  | 1.045 down | 1.074 down | 1.002 down | 1.123 down | 1.048 down | 1.071 down |
| PD1689 | inner membrane protein                       | 1.052 down | 1.027 up   | 1.215 down | 1.023 down | 1.278 down | 1.248 up   |
| PD1690 | transmembrane protein                        | 1.094 down | 1.038 down | 1.097 down | 1.136 down | 1.201 down | 1.056 up   |
| PD1691 | fimbrial assembly protein                    | 1.144 up   | 1.134 down | 1.083 down | 1.008 up   | 1.056 up   | 1.047 down |
| PD1692 | fimbrial assembly protein                    | 1.062 up   | 1.060 up   | 1.038 down | 1.126 up   | 1.023 up   | 1.100 up   |
| PD1693 | fimbrial assembly membrane protein           | 1.000 up   | 1.146 down | 1.582 down | 1.145 down | 1.581 down | 1.380 up   |
| PD1694 | fimbrial assembly membrane protein           | 1.441 up   | 1.013 down | 1.143 down | 1.421 up   | 1.260 up   | 1.128 up   |
| PD1695 | fimbrial assembly membrane protein           | 1.140 up   | 1.017 down | 1.125 up   | 1.120 up   | 1.283 up   | 1.145 down |
| PD1696 | penicillin-binding protein 1A                | 1.088 down | 1.037 down | 1.092 down | 1.129 down | 1.189 down | 1.052 up   |
| PD1697 | voltage-gated potassium channel beta subunit | 1.157 up   | 1.197 up   | 1.066 up   | 1.386 up   | 1.234 up   | 1.123 up   |
| PD1698 | ribokinase                                   | 1.068 up   | 1.226 down | 1.088 down | 1.147 down | 1.018 down | 1.127 down |
| PD1699 | OmpA family protein                          | 1.017 down | 1.251 up   | 1.367 up   | 1.229 up   | 1.343 up   | 1.092 down |
| PD1700 | hypothetical protein                         | 1.611 down | 1.108 down | 1.039 up   | 1.786 down | 1.551 down | 1.151 down |
| PD1701 | replicative DNA helicase                     | 1.090 down | 1.037 up   | 1.005 down | 1.051 down | 1.096 down | 1.042 up   |
| PD1702 | hypothetical protein                         | 1.213 up   | 1.048 up   | 1.155 up   | 1.272 up   | 1.402 up   | 1.102 down |
| PD1703 | hypothetical protein                         | 1.137 down | 1.388 up   | 1.400 up   | 1.221 up   | 1.231 up   | 1.008 down |
| PD1704 | cytochrome P-450 hydroxylase                 | 1.028 up   | 1.058 up   | 1.189 down | 1.088 up   | 1.156 down | 1.258 up   |

|        |                                                  |            |            |            |            |            |            |
|--------|--------------------------------------------------|------------|------------|------------|------------|------------|------------|
| PD1705 | ATP-dependent DNA helicase                       | 1.029 up   | 1.326 up   | 1.237 up   | 1.366 up   | 1.274 up   | 1.071 up   |
| PD1706 | translation initiation inhibitor                 | 1.108 down | 1.472 down | 1.037 up   | 1.632 down | 1.067 down | 1.528 down |
| PD1707 | pentaphosphate guanosine-3'-pyrophosphohydrolase | 1.163 down | 1.164 down | 1.049 down | 1.355 down | 1.220 down | 1.110 down |
| PD1708 | glycolate oxidase                                | 1.070 down | 1.301 down | 1.033 down | 1.393 down | 1.106 down | 1.259 down |
| PD1709 | outer membrane protein                           | 1.228 up   | 1.155 down | 1.241 down | 1.063 up   | 1.010 down | 1.074 up   |
| PD1710 | disulfide bond formation protein B               | 1.069 down | 1.005 down | 1.218 down | 1.074 down | 1.302 down | 1.212 up   |
| PD1711 | TonB-dependent receptor                          | 1.053 up   | 1.211 down | 1.028 up   | 1.149 down | 1.083 up   | 1.246 down |
| PD1712 | hypothetical protein                             | 1.110 up   | 1.143 down | 1.486 down | 1.030 down | 1.338 down | 1.299 up   |
| PD1713 | hypothetical protein                             | 1.084 up   | 1.015 down | 1.005 down | 1.068 up   | 1.078 up   | 1.010 down |
| PD1714 | hypothetical protein                             | 1.185 down | 1.159 up   | 1.171 up   | 1.022 down | 1.011 down | 1.010 down |
| PD1715 | hypothetical protein                             | 1.508 down | 1.146 up   | 1.615 up   | 1.315 down | 1.071 up   | 1.409 down |
| PD1716 | hypothetical protein                             | 1.317 up   | 1.495 down | 1.701 down | 1.135 down | 1.291 down | 1.137 up   |
| PD1717 | hypothetical protein                             | 1.078 down | 1.170 up   | 1.052 up   | 1.085 up   | 1.024 down | 1.111 up   |
| PD1718 | hypothetical protein                             | 1.025 up   | 1.137 down | 1.421 down | 1.109 down | 1.386 down | 1.249 up   |
| PD1719 | hypothetical protein                             | 1.082 up   | 1.243 up   | 1.063 down | 1.345 up   | 1.017 up   | 1.322 up   |
| PD1720 | hypothetical protein                             | 1.289 up   | 1.051 up   | 1.262 down | 1.355 up   | 1.021 up   | 1.327 up   |
| PD1721 | hypothetical protein                             | 1.070 down | 1.157 down | 1.030 up   | 1.238 down | 1.038 down | 1.192 down |
| PD1722 | hypothetical protein                             | 1.224 up   | 1.207 down | 1.051 down | 1.013 up   | 1.164 up   | 1.148 down |
| PD1723 | hypothetical protein                             | 1.002 up   | 1.276 up   | 1.064 up   | 1.280 up   | 1.067 up   | 1.199 up   |
| PD1724 | hypothetical protein                             | 1.001 up   | 1.273 up   | 1.177 up   | 1.275 up   | 1.179 up   | 1.081 up   |

|        |                                               |            |            |            |            |            |            |
|--------|-----------------------------------------------|------------|------------|------------|------------|------------|------------|
| PD1725 | hypothetical protein                          | 1.244 up   | 1.697 up   | 1.004 up   | 2.112 up   | 1.250 up   | 1.689 up   |
| PD1726 | hypothetical protein                          | 1.080 up   | 1.342 up   | 1.198 up   | 1.450 up   | 1.294 up   | 1.120 up   |
| PD1727 | phage-related DNA polymerase                  | 1.001 down | 1.404 up   | 1.034 up   | 1.403 up   | 1.032 up   | 1.358 up   |
| PD1728 | hypothetical protein                          | 1.033 down | 1.555 up   | 1.185 up   | 1.504 up   | 1.146 up   | 1.311 up   |
| PD1729 | hypothetical protein                          | 1.691 up   | 1.079 up   | 1.491 up   | 1.825 up   | 2.523 up   | 1.382 down |
| PD1730 | hypothetical protein                          | 1.065 up   | 1.658 up   | 1.130 up   | 1.766 up   | 1.204 up   | 1.466 up   |
| PD1731 | hypothetical protein                          | 1.039 up   | 1.382 down | 1.380 down | 1.329 down | 1.327 down | 1.001 down |
| PD1734 | excinuclease ABC subunit B                    | 1.006 up   | 1.024 down | 1.079 down | 1.017 down | 1.072 down | 1.054 up   |
| PD1735 | type 4 fimbrial biogenesis protein            | 1.000 up   | 1.040 down | 1.045 down | 1.039 down | 1.044 down | 1.004 up   |
| PD1736 | hypothetical protein                          | 1.129 up   | 1.008 up   | 1.257 up   | 1.139 up   | 1.420 up   | 1.246 down |
| PD1737 | dihydrodipicolinate synthase                  | 1.052 down | 1.191 up   | 1.040 up   | 1.132 up   | 1.010 down | 1.144 up   |
| PD1738 | transcriptional regulator                     | 1.230 down | 1.024 up   | 1.032 down | 1.201 down | 1.270 down | 1.057 up   |
| PD1739 | bacterioferritin comigratory protein          | 1.013 up   | 1.086 up   | 1.063 up   | 1.102 up   | 1.078 up   | 1.022 up   |
| PD1741 | hypothetical protein                          | 1.030 up   | 1.113 down | 1.067 down | 1.080 down | 1.036 down | 1.042 down |
| PD1742 | thiamine monophosphate kinase                 | 1.153 down | 1.186 up   | 1.016 up   | 1.028 up   | 1.135 down | 1.167 up   |
| PD1743 | transcription antitermination protein NusB    | 1.043 up   | 1.004 down | 1.018 up   | 1.039 up   | 1.063 up   | 1.022 down |
| PD1744 | riboflavin synthase subunit beta              | 1.109 up   | 1.021 down | 1.138 up   | 1.086 up   | 1.263 up   | 1.162 down |
| PD1745 | 3,4-dihydroxy-2-butanone 4-phosphate synthase | 1.064 down | 1.462 down | 1.381 down | 1.557 down | 1.470 down | 1.058 down |
| PD1746 | riboflavin synthase subunit alpha             | 1.255 down | 1.032 down | 1.070 up   | 1.297 down | 1.172 down | 1.106 down |
| PD1747 | riboflavin-specific deaminase                 | 1.116 up   | 1.075 down | 1.178 down | 1.037 up   | 1.055 down | 1.095 up   |

|        |                                                  |            |            |            |            |            |            |
|--------|--------------------------------------------------|------------|------------|------------|------------|------------|------------|
| PD1748 | hypothetical protein                             | 1.095 up   | 1.973 up   | 1.219 up   | 2.161 up   | 1.336 up   | 1.617 up   |
| PD1750 | serine hydroxymethyltransferase                  | 1.281 up   | 1.350 up   | 1.230 up   | 1.730 up   | 1.576 up   | 1.097 up   |
| PD1751 | ABC transporter ATP-binding protein              | 1.006 down | 1.075 up   | 1.091 up   | 1.069 up   | 1.084 up   | 1.014 down |
| PD1752 | malate:quinone oxidoreductase                    | 1.068 down | 1.322 down | 1.154 down | 1.412 down | 1.232 down | 1.145 down |
| PD1753 | hypothetical protein                             | 1.018 down | 1.125 up   | 1.020 up   | 1.105 up   | 1.002 up   | 1.102 up   |
| PD1754 | hypothetical protein                             | 1.001 up   | 1.195 up   | 1.137 up   | 1.197 up   | 1.139 up   | 1.051 up   |
| PD1755 | ribosomal large subunit pseudouridine synthase D | 1.135 up   | 1.093 down | 1.204 down | 1.037 up   | 1.061 down | 1.101 up   |
| PD1756 | hypothetical protein                             | 1.154 down | 1.206 up   | 1.295 up   | 1.045 up   | 1.121 up   | 1.073 down |
| PD1757 | hypothetical protein                             | 1.024 down | 1.130 up   | 1.229 up   | 1.104 up   | 1.200 up   | 1.086 down |
| PD1758 | ferrous iron transport protein B                 | 1.172 down | 1.008 up   | 1.037 down | 1.163 down | 1.216 down | 1.046 up   |
| PD1759 | ferrous iron transport protein                   | 1.063 down | 1.103 up   | 1.135 up   | 1.037 up   | 1.068 up   | 1.029 down |
| PD1760 | hypothetical protein                             | 1.035 up   | 1.228 down | 1.130 down | 1.187 down | 1.092 down | 1.086 down |
| PD1761 | hypothetical protein                             | 1.028 up   | 1.020 down | 1.025 down | 1.008 up   | 1.003 up   | 1.004 up   |
| PD1762 | methionyl-tRNA formyltransferase                 | 1.110 up   | 1.038 down | 1.298 down | 1.069 up   | 1.169 down | 1.249 up   |
| PD1763 | peptide deformylase                              | 1.119 down | 1.087 up   | 1.100 down | 1.028 down | 1.231 down | 1.196 up   |
| PD1764 | hypothetical protein                             | 1.030 down | 1.105 up   | 1.211 up   | 1.072 up   | 1.175 up   | 1.095 down |
| PD1765 | DNA processing chain A                           | 1.183 down | 1.045 down | 1.141 down | 1.237 down | 1.351 down | 1.092 up   |
| PD1766 | hypothetical protein                             | 1.077 down | 1.078 down | 1.202 down | 1.162 down | 1.295 down | 1.114 up   |
| PD1767 | DNA topoisomerase III                            | 1.066 up   | 1.098 up   | 1.110 down | 1.170 up   | 1.041 down | 1.219 up   |
| PD1768 | hypothetical protein                             | 1.351 down | 1.040 down | 1.029 down | 1.406 down | 1.391 down | 1.010 down |

|        |                                                              |            |            |            |            |            |            |
|--------|--------------------------------------------------------------|------------|------------|------------|------------|------------|------------|
| PD1769 | acyl-[ACP]-UDP-N-acetylglucosamine                           | 1.132 down | 1.015 down | 1.154 up   | 1.149 down | 1.019 up   | 1.172 down |
| PD1770 | hypothetical protein                                         | 1.057 down | 1.071 down | 1.165 down | 1.133 down | 1.233 down | 1.087 up   |
| PD1771 | hypothetical protein                                         | 1.307 up   | 1.026 down | 1.243 down | 1.273 up   | 1.050 up   | 1.211 up   |
| PD1772 | tropinone reductase                                          | 1.252 down | 1.374 down | 1.348 up   | 1.721 down | 1.076 up   | 1.852 down |
| PD1773 | stringent starvation protein B                               | 1.291 up   | 1.431 down | 1.137 down | 1.108 down | 1.134 up   | 1.258 down |
| PD1774 | stringent starvation protein A                               | 1.021 down | 1.079 down | 1.087 down | 1.102 down | 1.110 down | 1.007 up   |
| PD1775 | ubiquinol cytochrome C oxidoreductase, cytochrome C1 subunit | 1.107 up   | 1.444 down | 1.111 down | 1.304 down | 1.003 down | 1.299 down |
| PD1776 | ubiquinol cytochrome C oxidoreductase, cytochrome B subunit  | 1.136 down | 1.276 up   | 1.154 up   | 1.123 up   | 1.016 up   | 1.105 up   |
| PD1777 | ubiquinol cytochrome C oxidoreductase, iron-sulfur subunit   | 1.031 down | 1.064 up   | 1.064 down | 1.032 up   | 1.097 down | 1.133 up   |
| PD1778 | soluble lytic murein transglycosylase precursor              | 1.081 up   | 1.017 down | 1.110 up   | 1.063 up   | 1.201 up   | 1.129 down |
| PD1779 | hypothetical protein                                         | 1.191 down | 1.207 down | 1.061 down | 1.438 down | 1.265 down | 1.137 down |
| PD1780 | ATP binding protein                                          | 1.202 down | 1.045 down | 1.007 up   | 1.257 down | 1.193 down | 1.053 down |
| PD1781 | hypothetical protein                                         | 1.063 up   | 1.041 up   | 1.042 down | 1.107 up   | 1.020 up   | 1.085 up   |
| PD1782 | hypothetical protein                                         | 1.022 up   | 1.189 down | 1.632 down | 1.163 down | 1.597 down | 1.372 up   |
| PD1783 | magnesium and cobalt efflux protein                          | 1.214 down | 1.042 down | 1.145 down | 1.265 down | 1.390 down | 1.098 up   |
| PD1784 | hypothetical protein                                         | 1.169 down | 1.223 down | 1.106 down | 1.430 down | 1.294 down | 1.105 down |
| PD1785 | magnesium and cobalt transport protein                       | 1.003 up   | 1.102 down | 1.223 down | 1.098 down | 1.220 down | 1.110 up   |
| PD1786 | hypothetical protein                                         | 1.071 down | 1.190 down | 1.306 down | 1.275 down | 1.400 down | 1.098 up   |
| PD1787 | hypothetical protein                                         | 1.310 up   | 1.146 up   | 1.034 up   | 1.502 up   | 1.355 up   | 1.108 up   |

|        |                                         |            |            |            |            |            |            |
|--------|-----------------------------------------|------------|------------|------------|------------|------------|------------|
| PD1788 | hypothetical protein                    | 1.181 up   | 1.154 up   | 1.004 up   | 1.363 up   | 1.186 up   | 1.149 up   |
| PD1789 | hypothetical protein                    | 1.204 down | 1.067 up   | 1.390 up   | 1.128 down | 1.154 up   | 1.302 down |
| PD1790 | hypothetical protein                    | 1.143 down | 1.217 down | 1.197 up   | 1.392 down | 1.046 up   | 1.457 down |
| PD1791 | hypothetical protein                    | 1.331 up   | 1.031 down | 1.132 down | 1.290 up   | 1.175 up   | 1.097 up   |
| PD1792 | hemagglutinin-like protein              | 1.098 up   | 1.542 up   | 1.431 up   | 1.693 up   | 1.571 up   | 1.077 up   |
| PD1793 | mannosyltransferase                     | 1.055 up   | 1.453 down | 1.048 up   | 1.377 down | 1.106 up   | 1.524 down |
| PD1794 | hypothetical protein                    | 1.048 up   | 1.066 up   | 1.336 down | 1.118 up   | 1.273 down | 1.424 up   |
| PD1795 | sugar transferase                       | 1.124 up   | 1.047 up   | 1.080 down | 1.177 up   | 1.040 up   | 1.131 up   |
| PD1796 | penicillin-binding protein 1B           | 1.160 up   | 1.213 down | 1.324 down | 1.045 down | 1.141 down | 1.091 up   |
| PD1797 | hypothetical protein                    | 1.045 down | 1.390 down | 1.288 down | 1.453 down | 1.346 down | 1.079 down |
| PD1798 | ATP-dependent helicase                  | 1.089 up   | 1.125 down | 1.139 down | 1.033 down | 1.046 down | 1.012 up   |
| PD1799 | peptidase                               | 1.222 up   | 1.309 down | 1.226 down | 1.070 down | 1.003 down | 1.066 down |
| PD1800 | carbonic anhydrase                      | 1.219 up   | 1.020 up   | 1.038 up   | 1.244 up   | 1.266 up   | 1.017 down |
| PD1801 | lipopolysaccharide biosynthesis protein | 1.140 down | 1.269 up   | 1.170 up   | 1.112 up   | 1.026 up   | 1.084 up   |
| PD1802 | hypothetical protein                    | 1.002 down | 1.083 up   | 1.074 up   | 1.080 up   | 1.071 up   | 1.008 up   |
| PD1803 | hypothetical protein                    | 1.279 down | 1.233 down | 1.076 down | 1.578 down | 1.377 down | 1.145 down |
| PD1804 | ABC transporter ATP-binding protein     | 1.012 up   | 1.097 up   | 1.083 down | 1.111 up   | 1.070 down | 1.189 up   |
| PD1805 | ABC transporter permease protein        | 1.034 up   | 1.049 up   | 1.072 up   | 1.085 up   | 1.109 up   | 1.022 down |
| PD1806 | membrane protein                        | 1.015 down | 1.222 down | 1.288 down | 1.241 down | 1.307 down | 1.053 up   |
| PD1807 | outer membrane protein                  | 1.252 up   | 1.004 down | 1.239 up   | 1.247 up   | 1.552 up   | 1.244 down |

|        |                                                    |            |            |            |            |            |            |
|--------|----------------------------------------------------|------------|------------|------------|------------|------------|------------|
| PD1808 | hypothetical protein                               | 1.020 down | 1.101 down | 1.211 up   | 1.123 down | 1.187 up   | 1.334 down |
| PD1809 | dihydrolipoamide acetyltransferase                 | 1.060 down | 1.475 down | 1.323 down | 1.565 down | 1.404 down | 1.114 down |
| PD1810 | dihydrolipoamide dehydrogenase                     | 1.010 up   | 1.007 up   | 1.301 down | 1.018 up   | 1.287 down | 1.311 up   |
| PD1811 | cobalt-zinc-cadmium resistance protein             | 1.153 up   | 1.137 down | 1.249 up   | 1.014 up   | 1.441 up   | 1.421 down |
| PD1812 | cystathionine gamma-synthase                       | 1.419 up   | 1.227 down | 1.031 down | 1.156 up   | 1.376 up   | 1.189 down |
| PD1813 | homoserine O-acetyltransferase                     | 1.025 up   | 1.451 up   | 1.150 down | 1.488 up   | 1.121 down | 1.668 up   |
| PD1814 | peptidase                                          | 1.129 down | 1.193 up   | 1.231 up   | 1.057 up   | 1.090 up   | 1.031 down |
| PD1815 | hypothetical protein                               | 1.376 up   | 1.268 up   | 1.178 up   | 1.745 up   | 1.621 up   | 1.076 up   |
| PD1816 | hypothetical protein                               | 1.123 down | 1.246 up   | 1.136 up   | 1.108 up   | 1.011 up   | 1.096 up   |
| PD1817 | acid phosphatase                                   | 1.165 down | 1.233 down | 1.127 down | 1.437 down | 1.313 down | 1.094 down |
| PD1818 | L-isoaspartate O-methyltransferase                 | 1.353 down | 1.323 up   | 1.037 up   | 1.022 down | 1.305 down | 1.276 up   |
| PD1819 | lipoprotein                                        | 1.109 down | 1.435 up   | 1.442 up   | 1.294 up   | 1.300 up   | 1.004 down |
| PD1820 | lipoprotein                                        | 1.060 up   | 1.036 down | 1.126 down | 1.022 up   | 1.062 down | 1.086 up   |
| PD1822 | histidine kinase/response regulator hybrid protein | 1.056 up   | 1.036 down | 1.123 up   | 1.019 up   | 1.186 up   | 1.163 down |
| PD1823 | alanine racemase                                   | 1.011 down | 1.053 up   | 1.094 up   | 1.041 up   | 1.081 up   | 1.038 down |
| PD1824 | D-amino acid dehydrogenase small subunit           | 1.061 up   | 1.283 down | 1.285 down | 1.209 down | 1.211 down | 1.001 up   |
| PD1825 | methionine sulfoxide reductase B                   | 1.152 down | 1.353 down | 1.121 down | 1.559 down | 1.292 down | 1.206 down |
| PD1826 | hypothetical protein                               | 1.032 up   | 1.218 down | 1.125 down | 1.179 down | 1.089 down | 1.082 down |
| PD1827 | beta-hexosaminidase precursor                      | 1.114 down | 1.379 down | 1.579 down | 1.537 down | 1.760 down | 1.145 up   |
| PD1828 | beta-mannosidase precursor                         | 1.299 down | 1.241 up   | 1.093 up   | 1.046 down | 1.187 down | 1.134 up   |



|        |                                              |            |            |            |            |            |            |
|--------|----------------------------------------------|------------|------------|------------|------------|------------|------------|
| PD1829 | family 3 glycoside hydrolase                 | 1.225 down | 1.007 up   | 1.141 up   | 1.216 down | 1.073 down | 1.133 down |
| PD1831 | hypothetical protein                         | 1.019 up   | 1.235 up   | 1.020 up   | 1.258 up   | 1.039 up   | 1.210 up   |
| PD1832 | antigen                                      | 1.081 down | 1.040 up   | 1.034 up   | 1.039 down | 1.046 down | 1.006 up   |
| PD1833 | beta-galactosidase                           | 1.087 up   | 1.102 up   | 1.148 up   | 1.198 up   | 1.248 up   | 1.041 down |
| PD1834 | 4-hydroxythreonine-4-phosphate dehydrogenase | 1.079 up   | 1.323 down | 1.348 down | 1.226 down | 1.249 down | 1.018 up   |
| PD1835 | peptidyl-prolyl cis-trans isomerase          | 1.033 down | 1.168 up   | 1.153 down | 1.130 up   | 1.192 down | 1.348 up   |
| PD1836 | organic solvent tolerance protein precursor  | 1.055 up   | 1.396 down | 1.202 down | 1.323 down | 1.139 down | 1.161 down |
| PD1837 | 2-octaprenyl-6-methoxyphenyl hydroxylase     | 1.220 down | 1.109 up   | 1.095 up   | 1.100 down | 1.113 down | 1.012 up   |
| PD1838 | hypothetical protein                         | 1.181 down | 1.173 up   | 1.340 up   | 1.007 down | 1.134 up   | 1.142 down |
| PD1839 | transcriptional regulator LysR family        | 1.077 down | 1.202 up   | 1.210 up   | 1.115 up   | 1.123 up   | 1.006 down |
| PD1840 | siroheme synthase                            | 1.050 up   | 1.250 down | 1.100 down | 1.191 down | 1.048 down | 1.136 down |
| PD1841 | cysteine synthase                            | 1.288 down | 1.036 up   | 1.180 up   | 1.243 down | 1.092 down | 1.138 down |
| PD1842 | hypothetical protein                         | 1.268 down | 1.113 down | 1.122 up   | 1.412 down | 1.129 down | 1.249 down |
| PD1843 | hypothetical protein                         | 1.018 up   | 1.238 down | 1.116 down | 1.216 down | 1.096 down | 1.109 down |
| PD1844 | hypothetical protein                         | 1.030 down | 1.005 up   | 1.152 up   | 1.024 down | 1.118 up   | 1.145 down |
| PD1845 | fructose-bisphosphate aldolase               | 1.057 up   | 1.250 up   | 1.091 down | 1.322 up   | 1.032 down | 1.364 up   |
| PD1846 | pyruvate kinase                              | 1.065 down | 1.131 up   | 1.120 up   | 1.061 up   | 1.051 up   | 1.009 up   |
| PD1847 | phosphoglycerate kinase                      | 1.179 up   | 1.040 down | 1.145 up   | 1.133 up   | 1.351 up   | 1.191 down |
| PD1848 | glutamyl-tRNA synthetase                     | 1.084 down | 1.295 up   | 1.086 up   | 1.194 up   | 1.001 up   | 1.192 up   |
| PD1849 | transcriptional regulator Fur family         | 1.102 down | 1.416 down | 1.214 down | 1.561 down | 1.339 down | 1.166 down |

|        |                                                                                      |            |            |            |            |            |            |
|--------|--------------------------------------------------------------------------------------|------------|------------|------------|------------|------------|------------|
| PD1850 | peptidase (M20/M25/M40 family)                                                       | 1.167 up   | 1.085 down | 1.138 down | 1.075 up   | 1.025 up   | 1.048 up   |
| PD1851 | endo-1,4-beta-glucanase                                                              | 1.113 up   | 1.180 up   | 1.016 down | 1.314 up   | 1.095 up   | 1.200 up   |
| PD1852 | hypothetical protein                                                                 | 1.238 up   | 1.365 down | 1.048 down | 1.102 down | 1.181 up   | 1.302 down |
| PD1853 | zinc protease                                                                        | 1.159 down | 1.136 up   | 1.010 up   | 1.020 down | 1.147 down | 1.124 up   |
| PD1854 | hypothetical protein                                                                 | 1.018 down | 1.392 down | 1.066 down | 1.418 down | 1.086 down | 1.305 down |
| PD1855 | hypothetical protein                                                                 | 1.134 up   | 1.023 down | 1.064 up   | 1.108 up   | 1.207 up   | 1.089 down |
| PD1856 | extracellular endoglucanase precursor                                                | 1.144 down | 1.022 down | 1.040 up   | 1.170 down | 1.099 down | 1.063 down |
| PD1857 | translocase                                                                          | 1.095 up   | 1.303 down | 1.390 down | 1.189 down | 1.269 down | 1.067 up   |
| PD1858 | peptidase                                                                            | 1.096 up   | 1.216 up   | 1.008 up   | 1.334 up   | 1.106 up   | 1.206 up   |
| PD1859 | hypothetical protein                                                                 | 1.087 down | 1.047 down | 1.129 up   | 1.139 down | 1.038 up   | 1.182 down |
| PD1860 | UDP-3-O-[3-hydroxymyristoyl] N-acetylglucosamine deacetylase                         | 1.045 down | 1.119 up   | 1.040 up   | 1.070 up   | 1.004 down | 1.075 up   |
| PD1861 | cell division protein FtsZ                                                           | 1.048 up   | 1.056 up   | 1.180 down | 1.107 up   | 1.126 down | 1.247 up   |
| PD1862 | cell division protein                                                                | 1.008 up   | 1.187 up   | 1.004 down | 1.197 up   | 1.003 up   | 1.193 up   |
| PD1863 | cell division protein                                                                | 1.356 down | 1.341 up   | 1.043 down | 1.010 down | 1.414 down | 1.400 up   |
| PD1864 | D-alanylalanine synthetase                                                           | 1.141 up   | 1.013 down | 1.143 down | 1.126 up   | 1.001 down | 1.128 up   |
| PD1865 | UDP-N-acetylmuramate--L-alanine ligase                                               | 1.293 up   | 1.088 up   | 1.113 down | 1.407 up   | 1.161 up   | 1.211 up   |
| PD1866 | N-acetylglucosaminyl transferase                                                     | 1.256 down | 1.026 down | 1.004 up   | 1.290 down | 1.250 down | 1.031 down |
| PD1867 | cell division protein                                                                | 1.134 down | 1.130 up   | 1.001 up   | 1.004 down | 1.133 down | 1.128 up   |
| PD1868 | phospho-N-acetylmuramoyl-pentapeptide-transferase                                    | 1.094 up   | 1.085 up   | 1.022 down | 1.187 up   | 1.070 up   | 1.109 up   |
| PD1869 | UDP-N-acetylmuramoylalanyl-D-glutamyl-2, 6-diaminopimelate--D-alanyl-D-alanyl ligase | 1.100 up   | 1.257 up   | 1.204 up   | 1.384 up   | 1.325 up   | 1.044 up   |

|        |                                                                     |            |            |            |            |            |            |
|--------|---------------------------------------------------------------------|------------|------------|------------|------------|------------|------------|
| PD1870 | UDP-N-acetylmuramoylalanyl-D-glutamate--2, 6-diaminopimelate ligase | 1.053 down | 1.193 down | 1.104 down | 1.256 down | 1.162 down | 1.080 down |
| PD1871 | penicillin-binding protein 3                                        | 1.031 down | 1.403 down | 1.008 down | 1.447 down | 1.039 down | 1.391 down |
| PD1872 | cell division protein                                               | 1.073 down | 1.036 down | 1.014 down | 1.112 down | 1.089 down | 1.021 down |
| PD1873 | S-adenosyl-methyltransferase                                        | 1.334 down | 1.237 up   | 1.178 up   | 1.078 down | 1.132 down | 1.049 up   |
| PD1874 | hypothetical protein                                                | 1.178 up   | 1.015 up   | 1.017 down | 1.196 up   | 1.158 up   | 1.032 up   |
| PD1875 | sulfur deprivation response regulator                               | 1.111 up   | 1.065 up   | 1.300 down | 1.184 up   | 1.170 down | 1.385 up   |
| PD1876 | tRNA (guanine-N(7)-)-methyltransferase                              | 1.154 down | 1.020 up   | 1.176 up   | 1.131 down | 1.018 up   | 1.152 down |
| PD1877 | thiazole synthase                                                   | 1.011 up   | 1.182 up   | 1.056 down | 1.196 up   | 1.044 down | 1.249 up   |
| PD1878 | hypothetical protein                                                | 1.215 down | 1.107 down | 1.125 down | 1.345 down | 1.367 down | 1.016 up   |
| PD1879 | lipase/esterase                                                     | 1.125 up   | 1.019 up   | 1.014 down | 1.147 up   | 1.108 up   | 1.034 up   |
| PD1881 | phosphotransferase                                                  | 1.070 up   | 1.007 down | 1.054 up   | 1.063 up   | 1.129 up   | 1.062 down |
| PD1882 | membrane protein                                                    | 1.165 down | 1.032 up   | 1.048 down | 1.128 down | 1.221 down | 1.082 up   |
| PD1883 | fatty acyl-CoA synthetase                                           | 1.192 down | 1.117 up   | 1.056 down | 1.067 down | 1.259 down | 1.180 up   |
| PD1884 | acyltransferase                                                     | 1.099 down | 1.167 up   | 1.075 down | 1.061 up   | 1.182 down | 1.255 up   |
| PD1885 | dehydratase                                                         | 1.025 up   | 1.188 up   | 1.187 up   | 1.218 up   | 1.217 up   | none       |
| PD1886 | hypothetical protein                                                | 1.051 up   | 1.129 down | 1.047 up   | 1.073 down | 1.102 up   | 1.183 down |
| PD1887 | acyl carrier protein                                                | 1.034 up   | 1.533 up   | 1.158 up   | 1.585 up   | 1.197 up   | 1.323 up   |
| PD1888 | hypothetical protein                                                | 1.029 down | 1.001 up   | 1.133 up   | 1.028 down | 1.101 up   | 1.132 down |
| PD1889 | pteridine-dependent deoxygenase                                     | 1.150 down | 1.266 up   | 1.138 up   | 1.100 up   | 1.010 down | 1.112 up   |
| PD1890 | hypothetical protein                                                | 1.110 up   | 1.128 down | 1.203 down | 1.016 down | 1.083 down | 1.065 up   |

|        |                                              |            |            |            |            |            |            |
|--------|----------------------------------------------|------------|------------|------------|------------|------------|------------|
| PD1891 | transcriptional regulator ArsR family        | 1.040 up   | 1.011 up   | 1.250 up   | 1.051 up   | 1.300 up   | 1.236 down |
| PD1892 | hypothetical protein                         | 1.020 down | 1.227 down | 1.163 down | 1.252 down | 1.187 down | 1.054 down |
| PD1893 | hypothetical protein                         | 1.530 down | 1.075 up   | 1.387 up   | 1.424 down | 1.103 down | 1.290 down |
| PD1894 | membrane protein                             | 1.211 up   | 1.055 down | 1.089 down | 1.147 up   | 1.111 up   | 1.032 up   |
| PD1895 | deoxycytidine triphosphate deaminase         | 1.064 down | 1.257 down | 1.293 down | 1.338 down | 1.376 down | 1.028 up   |
| PD1896 | hypothetical protein                         | 1.119 up   | 1.086 down | 1.020 down | 1.029 up   | 1.097 up   | 1.065 down |
| PD1897 | DNA mismatch repair protein                  | 1.177 up   | 1.145 up   | 1.090 up   | 1.349 up   | 1.283 up   | 1.050 up   |
| PD1898 | N-acetylmuramoyl-L-alanine amidase precursor | 1.080 down | 1.019 down | 1.028 down | 1.100 down | 1.110 down | 1.009 up   |
| PD1899 | hypothetical protein                         | 1.058 up   | 1.014 up   | 1.119 up   | 1.073 up   | 1.184 up   | 1.103 down |
| PD1900 | hypothetical protein                         | 1.136 up   | 1.076 down | 1.047 up   | 1.056 up   | 1.190 up   | 1.127 down |
| PD1901 | exodeoxyribonuclease VII large subunit       | 1.062 up   | 1.022 down | 1.088 down | 1.039 up   | 1.024 down | 1.065 up   |
| PD1902 | virulence protein                            | 1.096 down | 1.280 up   | 1.008 up   | 1.168 up   | 1.087 down | 1.270 up   |
| PD1903 | hypothetical protein                         | 1.104 up   | 1.140 down | 1.048 down | 1.031 down | 1.053 up   | 1.087 down |
| PD1904 | ribonuclease D                               | 1.147 up   | 1.091 up   | 1.039 down | 1.252 up   | 1.103 up   | 1.135 up   |
| PD1905 | virulence regulator                          | 1.038 down | 1.059 down | 1.286 down | 1.100 down | 1.336 down | 1.214 up   |
| PD1906 | hypothetical protein                         | 1.107 down | 1.145 down | 1.072 down | 1.268 down | 1.188 down | 1.067 down |
| PD1907 | hypothetical protein                         | 1.217 up   | 1.023 down | 1.144 down | 1.189 up   | 1.064 up   | 1.118 up   |
| PD1909 | transcription regulator protein              | 1.025 down | 1.015 up   | 1.012 up   | 1.010 down | 1.013 down | 1.002 up   |
| PD1910 | integration host factor alpha subunit        | 1.181 up   | 1.051 up   | 1.034 down | 1.242 up   | 1.142 up   | 1.088 up   |
| PD1911 | phenylalanyl-tRNA synthetase beta subunit    | 1.054 down | 1.040 down | 1.238 up   | 1.097 down | 1.174 up   | 1.289 down |

|        |                                            |            |            |            |            |            |            |
|--------|--------------------------------------------|------------|------------|------------|------------|------------|------------|
| PD1912 | phenylalanyl-tRNA synthetase alpha subunit | 1.105 up   | 1.056 up   | 1.208 down | 1.167 up   | 1.093 down | 1.276 up   |
| PD1913 | 50S ribosomal protein L20                  | 1.055 up   | 1.047 up   | 1.139 up   | 1.105 up   | 1.203 up   | 1.087 down |
| PD1914 | 50S ribosomal protein L35                  | 1.003 up   | 1.289 down | 1.210 up   | 1.284 down | 1.214 up   | 1.560 down |
| PD1915 | translation initiation factor IF-3         | 1.103 up   | 1.125 up   | 1.235 down | 1.242 up   | 1.119 down | 1.390 up   |
| PD1916 | threonyl-tRNA synthetase                   | 1.102 up   | 1.013 up   | 1.052 up   | 1.117 up   | 1.160 up   | 1.038 down |
| PD1917 | hypothetical protein                       | 1.035 up   | 1.006 down | 1.131 up   | 1.028 up   | 1.171 up   | 1.138 down |
| PD1918 | ribosomal protein S6 modification protein  | 1.019 up   | 1.003 down | 1.171 down | 1.016 up   | 1.149 down | 1.167 up   |
| PD1919 | two-component system, regulatory protein   | 1.004 down | 1.158 up   | 1.144 up   | 1.153 up   | 1.139 up   | 1.012 up   |
| PD1920 | two-component system, sensor protein       | 1.209 up   | 1.029 down | 1.083 up   | 1.175 up   | 1.309 up   | 1.114 down |
| PD1921 | dephospho-CoA kinase                       | 1.109 down | 1.054 up   | 1.010 down | 1.052 down | 1.121 down | 1.065 up   |
| PD1922 | pre-pilin leader peptidase                 | 1.247 down | 1.153 up   | 1.081 up   | 1.081 down | 1.153 down | 1.066 up   |
| PD1923 | fimbrial assembly protein                  | 1.250 up   | 1.046 up   | 1.297 down | 1.308 up   | 1.037 down | 1.357 up   |
| PD1924 | fimbrial protein                           | 1.270 up   | 1.641 up   | 1.026 up   | 2.084 up   | 1.304 up   | 1.598 up   |
| PD1925 | hypothetical protein                       | 1.040 down | 1.177 down | 1.000 up   | 1.225 down | 1.039 down | 1.178 down |
| PD1926 | fimbrial protein                           | 1.405 up   | 1.458 up   | 1.628 up   | 2.049 up   | 2.288 up   | 1.116 down |
| PD1927 | pilus biogenesis protein                   | 1.053 down | 1.004 up   | 1.093 down | 1.049 down | 1.152 down | 1.098 up   |
| PD1928 | two-component system, regulatory protein   | 1.107 down | 1.105 up   | 1.062 down | 1.002 down | 1.177 down | 1.174 up   |
| PD1929 | two-component system, sensor protein       | 1.000 down | 1.086 up   | 1.076 up   | 1.085 up   | 1.075 up   | 1.009 up   |
| PD1930 | succinyl-CoA synthetase subunit beta       | 1.250 up   | 1.038 down | 1.157 down | 1.204 up   | 1.080 up   | 1.114 up   |
| PD1931 | succinyl-CoA synthetase alpha subunit      | 1.015 down | 1.088 up   | 1.257 down | 1.071 up   | 1.277 down | 1.368 up   |

|        |                                                   |            |            |            |            |            |            |
|--------|---------------------------------------------------|------------|------------|------------|------------|------------|------------|
| PD1932 | hypothetical protein                              | 1.128 up   | 1.031 up   | 1.035 down | 1.163 up   | 1.089 up   | 1.068 up   |
| PD1933 | hemolysin activation protein                      | 1.015 down | 1.034 up   | 1.068 up   | 1.018 up   | 1.052 up   | 1.032 down |
| PD1934 | hypothetical protein                              | 1.096 down | 1.185 down | 1.154 down | 1.299 down | 1.265 down | 1.026 down |
| PD1935 | DNA gyrase subunit A                              | 1.044 down | 1.493 down | 1.289 down | 1.559 down | 1.346 down | 1.157 down |
| PD1936 | translation initiation factor IF-2B subunit alpha | 1.050 down | 1.287 up   | 1.198 up   | 1.225 up   | 1.140 up   | 1.074 up   |
| PD1937 | hypothetical protein                              | 1.022 up   | 1.136 up   | 1.116 down | 1.161 up   | 1.091 down | 1.268 up   |
| PD1938 | lysyl-tRNA synthetase                             | 1.078 down | 1.487 down | 1.241 down | 1.604 down | 1.339 down | 1.198 down |
| PD1939 | N-acetyltransferase                               | 1.063 down | 1.109 down | 1.089 down | 1.179 down | 1.158 down | 1.018 down |
| PD1940 | DNA ligase                                        | 1.084 up   | 1.203 down | 1.468 down | 1.109 down | 1.354 down | 1.220 up   |
| PD1941 | cell division protein ZipA                        | 1.126 down | 1.060 up   | 1.050 down | 1.061 down | 1.183 down | 1.114 up   |
| PD1942 | chromosome segregation protein                    | 1.138 down | 1.049 up   | 1.125 up   | 1.084 down | 1.011 down | 1.072 down |
| PD1943 | 50S ribosomal protein L9                          | 1.176 up   | 1.144 down | 1.066 up   | 1.028 up   | 1.255 up   | 1.220 down |
| PD1944 | 30S ribosomal protein S18                         | 1.113 up   | 1.237 down | 1.365 down | 1.111 down | 1.225 down | 1.103 up   |
| PD1945 | 30S ribosomal protein S6                          | 1.019 up   | 1.132 up   | 1.235 up   | 1.154 up   | 1.259 up   | 1.090 down |
| PD1946 | hypothetical protein                              | 1.070 up   | 1.051 down | 1.098 down | 1.018 up   | 1.025 down | 1.044 up   |
| PD1947 | asparaginyl-tRNA synthetase                       | 1.061 down | 1.061 up   | 1.008 down | none       | 1.070 down | 1.070 up   |
| PD1948 | hypothetical protein                              | 1.101 up   | 1.024 up   | 1.053 down | 1.128 up   | 1.045 up   | 1.079 up   |
| PD1949 | ABC transporter permease protein                  | 1.082 up   | 1.028 down | 1.042 down | 1.052 up   | 1.038 up   | 1.014 up   |
| PD1950 | ABC transporter ATP-binding protein               | 1.006 up   | 1.164 down | 1.017 up   | 1.156 down | 1.023 up   | 1.184 down |
| PD1951 | hypothetical protein                              | 1.091 down | 1.090 up   | 1.009 up   | 1.000 down | 1.080 down | 1.079 up   |

|        |                                                      |            |            |            |            |            |            |
|--------|------------------------------------------------------|------------|------------|------------|------------|------------|------------|
| PD1952 | dihydroorotate dehydrogenase                         | 1.131 down | 1.215 down | 1.189 down | 1.375 down | 1.346 down | 1.021 down |
| PD1953 | UDP-N-acetylenolpyruvoylglucosamine reductase        | 1.165 down | 1.057 up   | 1.049 up   | 1.101 down | 1.110 down | 1.007 up   |
| PD1954 | hypothetical protein                                 | 1.097 down | 1.388 down | 1.195 down | 1.523 down | 1.311 down | 1.161 down |
| PD1955 | phosphatidylglycerophosphatase B                     | 1.413 down | 1.298 up   | 1.245 up   | 1.088 down | 1.134 down | 1.042 up   |
| PD1956 | 4-hydroxy-3-methylbut-2-en-1-yl diphosphate synthase | 1.101 up   | 1.010 down | 1.232 down | 1.089 up   | 1.119 down | 1.220 up   |
| PD1957 | two-component system, sensor protein                 | 1.163 up   | 1.134 down | 1.116 down | 1.025 up   | 1.041 up   | 1.015 down |
| PD1958 | two-component system, regulatory protein             | 1.165 down | 1.112 down | 1.150 up   | 1.296 down | 1.013 down | 1.279 down |
| PD1959 | elongation factor Ts                                 | 1.042 up   | 1.092 up   | 1.062 down | 1.138 up   | 1.019 down | 1.160 up   |
| PD1960 | 30S ribosomal protein S2                             | 1.453 up   | 1.064 up   | 1.301 down | 1.547 up   | 1.116 up   | 1.386 up   |
| PD1962 | ABC transporter ATP-binding protein                  | 1.109 down | 1.183 up   | 1.152 up   | 1.066 up   | 1.039 up   | 1.026 up   |
| PD1963 | protein-L-isoaspartate O-methyltransferase           | 1.081 down | 1.099 down | 1.211 down | 1.189 down | 1.310 down | 1.101 up   |
| PD1964 | outer membrane export factor                         | 1.151 down | 1.017 down | 1.127 up   | 1.171 down | 1.021 down | 1.147 down |
| PD1965 | UDP-2,3-diacetylglucosamine hydrolase                | 1.013 down | 1.007 up   | 1.216 up   | 1.005 down | 1.200 up   | 1.207 down |
| PD1966 | hypothetical protein                                 | 1.015 down | 1.040 down | 1.383 down | 1.056 down | 1.404 down | 1.329 up   |
| PD1967 | exopolyphosphatase                                   | 1.161 down | 1.066 down | 1.195 down | 1.239 down | 1.389 down | 1.120 up   |
| PD1968 | polyphosphate kinase                                 | 1.104 up   | 1.025 down | 1.493 down | 1.077 up   | 1.352 down | 1.457 up   |
| PD1969 | two-component system, sensor protein                 | 1.225 down | 1.020 up   | 1.249 up   | 1.201 down | 1.019 up   | 1.224 down |
| PD1970 | two-component system, regulatory protein             | 1.043 up   | 1.026 down | 1.016 up   | 1.017 up   | 1.060 up   | 1.042 down |
| PD1971 | protease                                             | 1.035 up   | 1.118 up   | 1.096 down | 1.158 up   | 1.058 down | 1.225 up   |
| PD1972 | glutaredoxin                                         | 1.002 up   | 1.286 down | 1.013 up   | 1.282 down | 1.016 up   | 1.303 down |

|        |                                                        |            |            |            |            |            |            |
|--------|--------------------------------------------------------|------------|------------|------------|------------|------------|------------|
| PD1973 | isocitrate dehydrogenase                               | 1.072 up   | 1.049 down | 1.175 down | 1.021 up   | 1.095 down | 1.119 up   |
| PD1974 | hypothetical protein                                   | 1.082 up   | 1.234 up   | 1.147 down | 1.336 up   | 1.060 down | 1.416 up   |
| PD1975 | 6-O-methylguanine-DNA methyltransferase                | 1.073 down | 1.157 up   | 1.142 up   | 1.078 up   | 1.064 up   | 1.012 up   |
| PD1976 | phosphodiesterase-nucleotide pyrophosphatase precursor | 1.179 down | 1.080 down | 1.225 up   | 1.274 down | 1.038 up   | 1.323 down |
| PD1977 | ferredoxin                                             | 1.237 down | 1.032 down | 1.177 up   | 1.278 down | 1.051 down | 1.215 down |
| PD1978 | hypothetical protein                                   | 1.067 down | 1.374 up   | 1.218 up   | 1.287 up   | 1.141 up   | 1.127 up   |
| PD1979 | hypothetical protein                                   | 1.089 down | 1.072 up   | 1.003 up   | 1.015 down | 1.085 down | 1.068 up   |
| PD1980 | pterin-4-alpha-carbinolamine dehydratase               | 1.150 down | 1.552 down | 1.345 down | 1.785 down | 1.547 down | 1.153 down |
| PD1981 | TonB protein                                           | 1.183 down | 1.418 up   | 1.186 down | 1.198 up   | 1.404 down | 1.683 up   |
| PD1982 | pseudouridylate synthase                               | 1.005 up   | 1.056 up   | 1.104 up   | 1.062 up   | 1.111 up   | 1.045 down |
| PD1983 | ribonuclease E                                         | 1.100 down | 1.121 up   | 1.109 down | 1.018 up   | 1.221 down | 1.244 up   |
| PD1984 | transcriptional regulator                              | 1.178 up   | 1.249 up   | 1.026 up   | 1.472 up   | 1.209 up   | 1.217 up   |
| PD1985 | hypothetical protein                                   | 1.110 up   | 1.290 down | 1.128 up   | 1.162 down | 1.253 up   | 1.456 down |
| PD1986 | response regulator                                     | 1.072 down | 1.220 up   | 1.034 down | 1.138 up   | 1.109 down | 1.263 up   |
| PD1987 | hypothetical protein                                   | 1.968 down | 1.107 up   | 1.111 up   | 1.778 down | 1.771 down | 1.003 down |
| PD1988 | superoxide dismutase                                   | 1.263 up   | 1.075 up   | 1.209 down | 1.359 up   | 1.044 up   | 1.301 up   |
| PD1989 | ribonuclease                                           | 1.186 up   | 1.015 up   | 1.152 up   | 1.205 up   | 1.367 up   | 1.134 down |
| PD1990 | hypothetical protein                                   | 1.167 down | 1.200 up   | 1.008 up   | 1.028 up   | 1.157 down | 1.190 up   |
| PD1991 | ABC transporter ATP-binding protein                    | 1.194 down | 1.064 up   | 1.004 up   | 1.122 down | 1.189 down | 1.059 up   |
| PD1992 | hypothetical protein                                   | 1.113 up   | 1.254 up   | 1.015 up   | 1.396 up   | 1.130 up   | 1.234 up   |



|        |                                            |            |            |            |            |            |            |
|--------|--------------------------------------------|------------|------------|------------|------------|------------|------------|
| PD1993 | temperature acclimation protein B          | 1.031 up   | 2.389 up   | 1.424 up   | 2.465 up   | 1.468 up   | 1.678 up   |
| PD1994 | hypothetical protein                       | 1.100 down | 1.116 down | 1.067 up   | 1.228 down | 1.030 down | 1.192 down |
| PD1995 | heat shock protein HtpX                    | 1.028 up   | 1.335 down | 1.171 down | 1.298 down | 1.138 down | 1.140 down |
| PD1996 | elongation factor Tu                       | 1.036 down | 1.400 up   | 1.096 down | 1.351 up   | 1.135 down | 1.535 up   |
| PD1997 | elongation factor EF-2                     | 1.003 up   | 1.181 down | 1.092 down | 1.177 down | 1.088 down | 1.081 down |
| PD1998 | 30S ribosomal protein S7                   | 1.181 down | 1.135 up   | 1.308 up   | 1.040 down | 1.107 up   | 1.152 down |
| PD1999 | 30S ribosomal protein S12                  | 1.074 down | 1.069 up   | 1.198 up   | 1.004 down | 1.116 up   | 1.120 down |
| PD2000 | DNA-directed RNA polymerase beta' subunit  | 1.364 up   | 1.289 down | 1.296 down | 1.058 up   | 1.052 up   | 1.005 up   |
| PD2001 | DNA-directed RNA polymerase beta subunit   | 1.127 down | 1.154 up   | 1.177 up   | 1.023 up   | 1.044 up   | 1.019 down |
| PD2002 | 50S ribosomal protein L7/L12               | 1.013 up   | 1.090 up   | 1.067 up   | 1.106 up   | 1.082 up   | 1.022 up   |
| PD2003 | 50S ribosomal protein L10                  | 1.095 down | 1.208 up   | 1.067 down | 1.103 up   | 1.168 down | 1.289 up   |
| PD2004 | 50S ribosomal protein L1                   | 1.022 up   | 1.048 up   | 1.035 up   | 1.071 up   | 1.058 up   | 1.012 up   |
| PD2005 | 50S ribosomal protein L11                  | 1.332 up   | 1.016 down | 1.279 up   | 1.311 up   | 1.705 up   | 1.300 down |
| PD2006 | transcription antitermination protein NusG | 1.107 up   | 1.133 down | 1.206 down | 1.023 down | 1.089 down | 1.064 up   |
| PD2007 | translocase                                | 1.408 up   | 1.071 down | 1.340 down | 1.314 up   | 1.050 up   | 1.250 up   |
| PD2009 | elongation factor Tu                       | 1.165 down | 1.545 up   | 1.271 up   | 1.325 up   | 1.090 up   | 1.216 up   |
| PD2013 | GTP-binding protein                        | 1.081 up   | 1.081 up   | 1.178 down | 1.169 up   | 1.089 down | 1.274 up   |
| PD2014 | peptidyl-tRNA hydrolase                    | 1.083 up   | 1.064 down | 1.075 up   | 1.018 up   | 1.165 up   | 1.144 down |
| PD2015 | 50S ribosomal protein L25                  | 1.059 up   | 1.003 down | 1.081 up   | 1.056 up   | 1.145 up   | 1.084 down |
| PD2016 | ribose-phosphate pyrophosphokinase         | 1.294 down | 1.253 down | 1.036 up   | 1.622 down | 1.249 down | 1.299 down |

|        |                                                            |            |            |            |            |            |            |
|--------|------------------------------------------------------------|------------|------------|------------|------------|------------|------------|
| PD2018 | 4-diphosphocytidyl-2-C-methyl-D-erythritol kinase          | 1.119 up   | 1.151 up   | 1.096 down | 1.288 up   | 1.020 up   | 1.262 up   |
| PD2019 | outer membrane lipoprotein LolB precursor                  | 1.027 up   | 1.235 up   | 1.173 up   | 1.269 up   | 1.206 up   | 1.052 up   |
| PD2020 | hypothetical protein                                       | 1.083 up   | 1.283 up   | 1.295 up   | 1.390 up   | 1.403 up   | 1.009 down |
| PD2021 | glutamyl-tRNA reductase                                    | 1.090 up   | 1.032 up   | 1.167 down | 1.126 up   | 1.070 down | 1.205 up   |
| PD2022 | peptide chain release factor 1                             | 1.194 down | 1.141 down | 1.113 down | 1.362 down | 1.329 down | 1.024 down |
| PD2023 | hypothetical protein                                       | 1.093 up   | 1.009 up   | 1.084 down | 1.104 up   | 1.008 up   | 1.094 up   |
| PD2024 | hypothetical protein                                       | 1.032 up   | 1.221 up   | 1.025 down | 1.261 up   | 1.007 up   | 1.252 up   |
| PD2025 | hypothetical protein                                       | 1.251 down | 1.073 down | 1.262 down | 1.343 down | 1.580 down | 1.176 up   |
| PD2026 | hypothetical protein                                       | 1.230 down | 1.139 down | 1.559 down | 1.402 down | 1.919 down | 1.368 up   |
| PD2027 | hypothetical protein                                       | 1.005 down | 1.002 down | 1.422 down | 1.008 down | 1.431 down | 1.419 up   |
| PD2028 | hypothetical protein                                       | 1.258 up   | 1.106 up   | 1.007 up   | 1.392 up   | 1.267 up   | 1.098 up   |
| PD2029 | hypothetical protein                                       | 1.175 down | 1.083 up   | 1.179 up   | 1.084 down | 1.002 up   | 1.088 down |
| PD2030 | hypothetical protein                                       | 1.099 up   | 1.220 up   | 1.232 up   | 1.341 up   | 1.355 up   | 1.010 down |
| PD2031 | hypothetical protein                                       | 1.051 up   | 1.044 up   | 1.036 down | 1.098 up   | 1.014 up   | 1.082 up   |
| PD2032 | hypothetical protein                                       | 1.710 up   | 1.222 down | 1.257 down | 1.398 up   | 1.360 up   | 1.028 up   |
| PD2033 | hypothetical protein                                       | 1.009 up   | 1.067 up   | 1.096 up   | 1.078 up   | 1.107 up   | 1.026 down |
| PD2034 | hypothetical protein                                       | 1.269 down | 1.063 up   | 1.205 up   | 1.194 down | 1.053 down | 1.133 down |
| PD2035 | phosphoribosylaminoimidazole carboxylase                   | 1.026 down | 1.191 down | 1.310 down | 1.222 down | 1.344 down | 1.100 up   |
| PD2036 | phosphoribosylaminoimidazole carboxylase catalytic subunit | 1.004 down | 1.167 up   | 1.199 up   | 1.161 up   | 1.193 up   | 1.026 down |
| PD2037 | hypothetical protein                                       | 1.104 up   | 1.062 down | 1.004 down | 1.039 up   | 1.098 up   | 1.057 down |

|        |                                            |            |            |            |            |            |            |
|--------|--------------------------------------------|------------|------------|------------|------------|------------|------------|
| PD2038 | hypothetical protein                       | 1.099 down | 1.232 up   | 1.330 up   | 1.120 up   | 1.210 up   | 1.079 down |
| PD2039 | oxidoreductase                             | 1.020 down | 1.056 down | 1.062 up   | 1.077 down | 1.040 up   | 1.121 down |
| PD2040 | virulence protein                          | 1.206 up   | 1.057 up   | 1.364 down | 1.276 up   | 1.130 down | 1.443 up   |
| PD2041 | ATP-dependent DNA helicase/DNA helicase II | 1.057 up   | 1.337 up   | 1.138 up   | 1.413 up   | 1.203 up   | 1.174 up   |
| PD2042 | periplasmic glucan biosynthesis protein    | 1.080 up   | 1.061 up   | 1.090 down | 1.146 up   | 1.009 down | 1.157 up   |
| PD2043 | protease IV                                | 1.221 up   | 1.309 up   | 1.115 up   | 1.600 up   | 1.363 up   | 1.173 up   |
| PD2044 | multidrug efflux protein NorA              | 1.041 up   | 1.008 up   | 1.071 down | 1.050 up   | 1.028 down | 1.080 up   |
| PD2045 | hypothetical protein                       | 1.163 up   | 1.047 down | 1.353 down | 1.110 up   | 1.164 down | 1.292 up   |
| PD2046 | hypothetical protein                       | 1.169 down | 1.001 up   | 1.126 down | 1.167 down | 1.317 down | 1.128 up   |
| PD2047 | primosome assembly protein PriA            | 1.094 down | 1.023 down | 1.015 up   | 1.119 down | 1.077 down | 1.038 down |
| PD2048 | RNA polymerase sigma factor                | 1.140 up   | 1.009 up   | 1.109 down | 1.151 up   | 1.027 up   | 1.121 up   |
| PD2049 | uracil-DNA glycosylase                     | 1.117 up   | 1.062 down | 1.241 down | 1.052 up   | 1.110 down | 1.168 up   |
| PD2050 | two-component hybrid sensor and regulator  | 1.202 down | 1.082 down | 1.191 up   | 1.301 down | 1.009 down | 1.289 down |
| PD2051 | cell division protein                      | 1.342 up   | 1.027 down | 1.125 down | 1.306 up   | 1.193 up   | 1.095 up   |
| PD2052 | ABC transporter ATP-binding protein        | 1.053 down | 1.079 down | 1.056 down | 1.137 down | 1.112 down | 1.022 down |
| PD2053 | ATP-dependent RNA helicase                 | 1.187 up   | 1.409 up   | 1.023 up   | 1.673 up   | 1.215 up   | 1.376 up   |
| PD2054 | thioredoxin                                | 1.263 down | 1.014 up   | 1.377 up   | 1.245 down | 1.090 up   | 1.357 down |
| PD2055 | transcription termination factor Rho       | 1.017 up   | 1.244 down | 1.081 down | 1.223 down | 1.063 down | 1.150 down |
| PD2056 | isocitrate dehydrogenase                   | 1.076 up   | 1.217 up   | 1.092 up   | 1.310 up   | 1.176 up   | 1.114 up   |
| PD2057 | carboxyl-terminal protease                 | 1.170 up   | 1.028 down | 1.381 up   | 1.138 up   | 1.617 up   | 1.420 down |

|        |                                                                |            |            |            |            |            |            |
|--------|----------------------------------------------------------------|------------|------------|------------|------------|------------|------------|
| PD2058 | hypothetical protein                                           | none       | 1.383 up   | 1.021 up   | 1.382 up   | 1.021 up   | 1.354 up   |
| PD2059 | peptidase                                                      | 1.086 up   | 1.102 down | 1.324 down | 1.015 down | 1.219 down | 1.200 up   |
| PD2060 | hypothetical protein                                           | 1.015 up   | 1.149 up   | 1.054 up   | 1.166 up   | 1.070 up   | 1.089 up   |
| PD2061 | endo-1,4-beta-glucanase                                        | 1.091 down | 1.107 up   | 1.070 down | 1.014 up   | 1.168 down | 1.185 up   |
| PD2062 | glutamate synthase, beta subunit                               | 1.028 up   | 1.172 up   | 1.195 up   | 1.205 up   | 1.229 up   | 1.019 down |
| PD2063 | glutamate synthase, alpha subunit                              | 1.203 up   | 1.114 down | 1.322 down | 1.079 up   | 1.099 down | 1.186 up   |
| PD2064 | pyrroline-5-carboxylate reductase                              | 1.209 down | 1.004 up   | 1.169 down | 1.203 down | 1.415 down | 1.175 up   |
| PD2065 | tonB-dependent receptor                                        | 1.061 up   | 1.215 down | 1.187 down | 1.144 down | 1.118 down | 1.023 down |
| PD2066 | alpha-L-fucosidase                                             | 1.200 down | 1.096 down | 1.005 down | 1.315 down | 1.207 down | 1.089 down |
| PD2068 | hypothetical protein                                           | 1.167 up   | 1.101 up   | 1.109 up   | 1.285 up   | 1.295 up   | 1.007 down |
| PD2069 | hypothetical protein                                           | 1.061 up   | 1.030 up   | 1.073 down | 1.093 up   | 1.012 down | 1.106 up   |
| PD2070 | type I restriction-modification system endonuclease            | 1.119 up   | 1.006 down | 1.057 down | 1.112 up   | 1.058 up   | 1.051 up   |
| PD2071 | type I restriction-modification system specificity determinant | 1.062 down | 1.071 down | 1.123 up   | 1.138 down | 1.056 up   | 1.203 down |
| PD2072 | type I restriction-modification system DNA methylase           | 1.122 up   | 1.287 down | 1.018 up   | 1.147 down | 1.143 up   | 1.311 down |
| PD2073 | hypothetical protein                                           | 1.017 down | 1.065 down | 1.027 up   | 1.083 down | 1.010 up   | 1.094 down |
| PD2074 | type I restriction-modification system endonuclease            | 1.078 up   | 1.058 up   | 1.097 up   | 1.141 up   | 1.183 up   | 1.036 down |
| PD2075 | type I restriction-modification system specificity determinant | 1.033 up   | 1.112 down | 1.117 down | 1.076 down | 1.081 down | 1.004 up   |
| PD2076 | type I restriction-modification system DNA methylase           | 1.208 down | 1.225 up   | 1.146 up   | 1.013 up   | 1.054 down | 1.068 up   |
| PD2077 | amino acid transporter                                         | 1.043 up   | 1.118 down | 1.190 down | 1.072 down | 1.141 down | 1.064 up   |
| PD2078 | hypothetical protein                                           | 1.164 up   | 1.095 up   | 1.099 down | 1.276 up   | 1.059 up   | 1.204 up   |

|        |                                        |            |            |            |            |            |            |
|--------|----------------------------------------|------------|------------|------------|------------|------------|------------|
| PD2079 | hypothetical protein                   | 1.060 down | 1.047 down | 1.038 down | 1.110 down | 1.101 down | 1.008 down |
| PD2080 | hypothetical protein                   | 1.173 up   | 1.059 down | 1.051 up   | 1.108 up   | 1.233 up   | 1.113 down |
| PD2081 | hypothetical protein                   | 1.005 up   | 1.069 down | 1.036 down | 1.063 down | 1.030 down | 1.031 down |
| PD2082 | hypothetical protein                   | 1.026 up   | 1.231 down | 1.027 up   | 1.199 down | 1.054 up   | 1.264 down |
| PD2083 | hypothetical protein                   | 1.011 up   | 1.311 up   | 1.294 up   | 1.326 up   | 1.309 up   | 1.013 up   |
| PD2084 | hypothetical protein                   | 1.068 up   | 1.167 up   | 1.047 up   | 1.247 up   | 1.119 up   | 1.114 up   |
| PD2085 | hypothetical protein                   | 1.105 down | 1.105 up   | 1.010 down | none       | 1.116 down | 1.116 up   |
| PD2086 | hypothetical protein                   | 1.243 down | 1.162 down | 1.164 up   | 1.446 down | 1.068 down | 1.353 down |
| PD2087 | hypothetical protein                   | 1.227 up   | 1.127 down | 1.316 down | 1.088 up   | 1.072 down | 1.168 up   |
| PD2088 | hypothetical protein                   | 1.099 down | 1.002 up   | 1.463 down | 1.096 down | 1.609 down | 1.467 up   |
| PD2089 | hypothetical protein                   | 1.095 down | 1.046 up   | 1.048 down | 1.046 down | 1.148 down | 1.097 up   |
| PD2090 | hypothetical protein                   | 1.525 down | 1.390 up   | 1.110 up   | 1.096 down | 1.373 down | 1.252 up   |
| PD2091 | hypothetical protein                   | 1.147 down | 1.172 up   | 1.093 up   | 1.021 up   | 1.049 down | 1.071 up   |
| PD2092 | hypothetical protein                   | 1.139 up   | 1.212 up   | 1.096 up   | 1.381 up   | 1.249 up   | 1.105 up   |
| PD2093 | hypothetical protein                   | 1.203 up   | 1.141 down | 1.051 up   | 1.054 up   | 1.265 up   | 1.200 down |
| PD2094 | hemolysin-type calcium binding protein | 1.028 up   | 1.134 up   | 1.193 down | 1.166 up   | 1.160 down | 1.354 up   |
| PD2095 | hypothetical protein                   | 1.133 up   | 1.367 up   | 1.084 down | 1.549 up   | 1.044 up   | 1.482 up   |
| PD2096 | hypothetical protein                   | 1.111 up   | 1.023 up   | 1.216 up   | 1.136 up   | 1.351 up   | 1.188 down |
| PD2097 | hemolysin-type calcium binding protein | 1.196 up   | 1.032 up   | 1.054 down | 1.235 up   | 1.134 up   | 1.089 up   |
| PD2098 | hypothetical protein                   | 1.064 up   | 1.102 down | 1.024 down | 1.035 down | 1.039 up   | 1.076 down |

|        |                                                            |            |            |            |            |            |            |
|--------|------------------------------------------------------------|------------|------------|------------|------------|------------|------------|
| PD2103 | hypothetical protein                                       | 1.002 up   | 1.302 up   | 1.206 up   | 1.305 up   | 1.210 up   | 1.078 up   |
| PD2104 | hypothetical protein                                       | 1.104 up   | 1.017 down | 1.086 up   | 1.085 up   | 1.199 up   | 1.105 down |
| PD2105 | hypothetical protein                                       | 1.102 down | 1.096 up   | 1.090 up   | 1.005 down | 1.011 down | 1.005 up   |
| PD2106 | hypothetical protein                                       | 1.388 down | 1.957 up   | 1.191 up   | 1.409 up   | 1.166 down | 1.643 up   |
| PD2107 | hypothetical protein                                       | 1.352 up   | 1.008 up   | 1.042 down | 1.363 up   | 1.296 up   | 1.051 up   |
| PD2108 | hypothetical protein                                       | 1.150 up   | 1.290 up   | 1.091 up   | 1.484 up   | 1.255 up   | 1.182 up   |
| PD2109 | hypothetical protein                                       | 1.633 up   | 1.684 down | 1.104 down | 1.031 down | 1.478 up   | 1.524 down |
| PD2110 | hemagglutinin-like secreted protein                        | 1.171 up   | 1.333 up   | 1.105 up   | 1.561 up   | 1.295 up   | 1.205 up   |
| PD2111 | hypothetical protein                                       | 1.013 up   | 1.045 down | 1.511 up   | 1.032 down | 1.531 up   | 1.580 down |
| PD2112 | hypothetical protein                                       | 1.171 up   | 1.100 up   | 1.380 up   | 1.288 up   | 1.617 up   | 1.255 down |
| PD2113 | hypothetical protein                                       | 1.321 up   | 1.030 down | 1.248 up   | 1.282 up   | 1.649 up   | 1.286 down |
| PD2114 | hypothetical protein                                       | 1.256 up   | 1.034 up   | 1.117 up   | 1.299 up   | 1.403 up   | 1.080 down |
| PD2115 | hypothetical protein                                       | 1.114 up   | 1.179 down | 1.125 down | 1.058 down | 1.009 down | 1.047 down |
| PD2116 | hemagglutinin-like secreted protein                        | 1.419 up   | 1.063 up   | 1.039 up   | 1.510 up   | 1.475 up   | 1.023 up   |
| PD2117 | hypothetical protein                                       | 1.062 up   | 1.021 down | 1.025 up   | 1.040 up   | 1.089 up   | 1.047 down |
| PD2118 | hemagglutinin-like secreted protein                        | 1.207 up   | 1.521 up   | 1.470 up   | 1.843 up   | 1.774 up   | 1.038 up   |
| PD2119 | tRNA modification GTPase                                   | 1.042 up   | 1.132 up   | 1.051 down | 1.180 up   | 1.008 down | 1.190 up   |
| PD2120 | hypothetical protein                                       | 1.085 down | 1.084 up   | 1.107 up   | 1.001 down | 1.019 up   | 1.020 down |
| PD2121 | putative inner membrane protein translocase component YidC | 1.238 up   | 1.091 down | 1.129 down | 1.135 up   | 1.096 up   | 1.034 up   |
| PD2122 | ribonuclease P                                             | 1.116 down | 1.418 up   | 1.200 up   | 1.270 up   | 1.075 up   | 1.181 up   |

|         |                           |            |            |            |            |            |            |
|---------|---------------------------|------------|------------|------------|------------|------------|------------|
| PD2123  | 50S ribosomal protein L34 | 1.272 down | 1.042 down | 1.187 up   | 1.326 down | 1.071 down | 1.237 down |
| PDa0001 | hypothetical protein      | 1.126 down | 1.219 down | 1.077 up   | 1.373 down | 1.045 down | 1.314 down |
| PDa0002 | replication protein       | 1.280 up   | 1.701 down | 1.488 down | 1.328 down | 1.162 down | 1.142 down |

---
