# Supplementary material
Source: PubMed Central journal article supplement (PMC2799766)
Supplement: 0908562106_ST2_PDF.pdf [file 0908562106_ST2_PDF.pdf]

**Table S2.** Genes differentially regulated in *X. fastidiosa* cells grown in PWG, XFM, and XFM supplemented with glucan and pectin based on whole-genome microarray comparisons

| Cluster | Genes                                       |                               |
|---------|---------------------------------------------|-------------------------------|
|         | Up                                          | Down                          |
| I       | PD0029 hypothetical protein                 | PD0503 hypothetical protein   |
|         | PD0298 hypothetical protein                 | PD1030 hypothetical protein   |
|         | PD0313 serine protease                      | PD1291GTP-binding protein Era |
|         | PD0318 hypothetical protein                 | PD1524 hypothetical protein   |
|         | PD0901 glutathione peroxidase-like protein  | PD1565 hypothetical protein   |
|         | PD0912 hypothetical protein                 | PD1700 hypothetical protein   |
|         | PD0987 hypothetical protein                 | PD1893 hypothetical protein   |
|         | PD1408 autolytic lysozyme                   | PD1987 hypothetical protein   |
|         | PD1960 30S ribosomal protein S2             | PD2089 hypothetical protein   |
|         | PD2032 hypothetical protein                 |                               |
| II      | PD1502 acyl carrier protein                 |                               |
|         | PD1729 hypothetical protein                 |                               |
| III     | PD0632 phosphotransferase system HPr enzyme | PD0037 DNA helicase II        |
|         | PD0666 translation initiation factor IF-1   | PD0916 hypothetical protein   |
|         | PD0674 transmembrane protein                | PD0929 hypothetical protein   |
|         | PD0750 citrate synthase                     | PD1119 hypothetical protein   |
|         | PD0919 hypothetical protein                 |                               |
|         | PD0948 carboxyl-terminal protease           |                               |
|         | PD2109 hypothetical protein                 |                               |

|    |                                                        |                                                                      |
|----|--------------------------------------------------------|----------------------------------------------------------------------|
| IV | PD0062 fimbrial subunit precursor                      | PD0098 cysteine synthase                                             |
|    | PD0069 hypothetical protein                            | PD0216 colicin V precursor                                           |
|    | PD0095 carbon storage regulator                        | PD0297 gamma-glutamyl phosphate reductase                            |
|    | PD0236 aconitate hydratase                             | PD0464 competence-related protein                                    |
|    | PD0244 hypothetical protein                            | PD0498 hypothetical protein                                          |
|    | PD0281 dihydroorotase                                  | PD0511 hypothetical protein                                          |
|    | PD0301 hypothetical protein                            | PD0549 electron transfer flavoprotein                                |
|    | PD0303 hypothetical protein                            | ubiquinone oxidoreductase                                            |
|    | PD0328 1-deoxy-D-xylulose-5-phosphate reductoisomerase | PD0566 cell division topological specificity factor MinE             |
|    | PD0363 phage-related tail protein                      | PD0587 hypothetical protein                                          |
|    | PD0366 phage-related baseplate assembly protein        | PD0621 cytochrome O ubiquinol oxidase subunit                        |
|    | PD0377 hypothetical protein                            | IV                                                                   |
|    | PD0380 hypothetical protein                            | PD0625 octaprenyl-diphosphate synthase                               |
|    | PD0381 hypothetical protein                            | PD0649 hypothetical protein                                          |
|    | PD0400 transcription elongation factor GreA            | PD0692 ABC transporter ATP-binding protein                           |
|    | PD0665 ATP-dependent Clp protease subunit              | PD0714 phosphoadenosine phosphosulfate reductase                     |
|    | PD0796 hypothetical protein                            | PD0740 general secretion pathway protein                             |
|    | PD0906 hypothetical protein                            | PD0757 peptidoglycan-associated outer membrane lipoprotein precursor |
|    | PD0939 hypothetical protein                            | PD0759 dihydrolipoamide acetyltransferase                            |
|    | PD0952 conjugal transfer protein                       | PD0744 hypothetical protein                                          |
|    | PD0994 hypothetical protein                            | PD0778 biotin synthesis protein                                      |
|    | PD1050 hypothetical protein                            | PD0787 5'-nucleotidase                                               |
|    | PD1093 hypothetical protein                            | PD0788 hypothetical protein                                          |
|    | PD1097 phage-related baseplate assembly protein        | PD0812 hypothetical protein                                          |
|    | PD1101 phage-related baseplate assembly protein        | PD0844 glutathione synthetase                                        |
|    | PD1106 hypothetical protein                            | PD0862 glucose-inhibited division protein B                          |
|    | PD1110 phage-related packaging protein                 | PD0920 hypothetical protein                                          |
|    | PD1111 hypothetical protein                            | PD0926 hypothetical protein                                          |
|    | PD1113 phage-related lysozyme                          | PD0996 aspartyl-tRNA synthetase                                      |
|    | PD1132 hypothetical protein                            | PD0973 hypothetical protein                                          |
|    | PD1134 phage-related DNA polymerase                    | PD0973 hypothetical protein                                          |
|    | PD1137 hypothetical protein                            | PD1052 methanol dehydrogenase regulatory protein                     |
|    | PD1182 hypothetical protein                            | PD1084 hypothetical protein                                          |
|    | PD1194 hypothetical protein                            | PD1121 hypothetical protein                                          |
|    | PD1196 phage-related integrase                         | PD1158 hypothetical protein                                          |
|    | PD1391 GumH protein                                    | PD1203 ABC transporter phosphate permease                            |
|    | PD1394 GumD protein                                    | PD1208 dimethyladenosine transferase                                 |
|    | PD1396 GumB protein                                    | PD1211 hypothetical protein                                          |
|    | PD1419 hypothetical protein                            | PD1219 hypothetical protein                                          |
|    | PD1421 hypothetical protein                            | PD1238 hypothetical protein                                          |
|    | PD1425 hypothetical protein                            | PD1243 hypothetical protein                                          |
|    | PD1429 DNA helicase                                    | PD1244 hypothetical protein                                          |
|    | PD1611 fimbrial assembly protein                       | PD1245 hypothetical protein                                          |
|    | PD1613 hypothetical protein                            | PD1254 oxidoreductase                                                |
|    | PD1619 GTP-binding protein EngA                        | PD1264 imidazole glycerol phosphate synthase subunit HisH            |
|    | PD1636 hypothetical protein                            | PD1255 hypothetical protein                                          |
|    | PD1644 30S ribosomal protein S21                       | PD1292 DNA repair protein RecO                                       |

|   |                                            |                                                        |
|---|--------------------------------------------|--------------------------------------------------------|
| V | PD0106 leucyl aminopeptidase               | PD0021 hypothetical protein                            |
|   | PD0195 ribosome-binding factor A           | PD0023 PilY1 protein homolog                           |
|   | PD0256 NADH dehydrogenase subunit I        | PD0105 hypothetical protein                            |
|   | PD0362 tetraacyldisaccharide 4'-kinase     | PD0138 formamidopyrimidine-DNA glycosylase             |
|   | PD0386 hypothetical protein                | PD0143 hemolysin III protein                           |
|   | PD0456 50S ribosomal protein L15           | PD0183 protein export protein SecF                     |
|   | PD0610 tRNA pseudouridine synthase A       | PD0220 hypothetical protein                            |
|   | PD0738 general secretory pathway protein K | PD0290 ornithine carbamoyltransferase                  |
|   | PD0825 transmembrane protein               | PD0310 pathogenicity-related protein                   |
|   | PD0995 hypothetical protein                | PD0311 acyl-CoA thioesterase II                        |
|   | PD0998 hypothetical protein                | PD0324 (3 <i>R</i> )-hydroxymyristoyl ACP              |
|   | PD1118 hypothetical protein                | dehydratase                                            |
|   | PD1241 hypothetical protein                | PD0325 UDP-3- <i>O</i> -[3-                            |
|   | PD1380 cold shock protein                  | hydroxymyristoyl]glucosamine <i>N</i> -acyltransferase |
|   | PD1523 endonuclease III                    | PD0333 hypothetical protein                            |
|   | PD1674 dinucleoside polyphosphate          | PD0389 hypothetical protein                            |
|   | hydrolase                                  | PD0390 hypothetical protein                            |
|   | PD1715 hypothetical protein                | PD0492 malate dehydrogenase                            |
|   | PD2005 50S ribosomal protein L11           | PD0551 hypothetical protein                            |
|   | PD2057 carboxyl-terminal protease          | PD0614 DNA repair protein                              |
|   | PD2111 hypothetical protein                | PD0667 leucyl/phenylalanyl-tRNA--protein               |
|   | PD2112 hypothetical protein                | transferase                                            |
|   | PD2113 hypothetical protein                | PD0687 Shf protein                                     |
|   |                                            | PD0689 benzene 1,2-dioxygenase, ferredoxin             |
|   |                                            | protein                                                |
|   |                                            | PD0828 bifunctional phosphoribosylamino-               |
|   |                                            | imidazolecarboxamide formyltransferase/IMP             |
|   |                                            | cyclohydrolase                                         |
|   |                                            | PD0872 iron-sulfur flavoprotein                        |
|   |                                            | PD1040 organic hydroperoxide resistance                |
|   |                                            | protein                                                |
|   |                                            | PD1070 porphyrin biosynthesis protein                  |
|   |                                            | PD1128 hypothetical protein                            |
|   |                                            | PD1130 hypothetical protein                            |
|   |                                            | PD1214 hypothetical protein                            |
|   |                                            | PD1233 nicotinic acid mononucleotide                   |
|   |                                            | adenyltransferase                                      |
|   |                                            | PD1234 hypothetical protein                            |
|   |                                            | PD1275 Holliday junction resolvase-like protein        |
|   |                                            | PD1322 phage-related DNA polymerase                    |
|   |                                            | PD1333 IS1327 transposase                              |
|   |                                            | PD1371 heat shock protein GrpE                         |
|   |                                            | PD1386 response regulator                              |
|   |                                            | PD1413 hemolysin secretion protein D                   |
|   |                                            | PD1445 hypothetical protein                            |
|   |                                            | PD1461 pantothenase                                    |
|   |                                            | PD1521 integral membrane protein                       |
|   |                                            | PD1531 hypothetical protein                            |
|   |                                            | PD1564 phosphoribosylaminoimidazole                    |
|   |                                            | synthetase                                             |
|   |                                            | PD1632 regulatory protein pilH family                  |
|   |                                            | PD1693 fimbrial assembly membrane protein              |

|    |                                             |                                                                |
|----|---------------------------------------------|----------------------------------------------------------------|
| VI | PD0055 signal recognition particle protein  | PD0084 50S ribosomal protein L19                               |
|    | PD0066 RNA-binding protein Hfq              | PD0099 hypothetical protein                                    |
|    | PD0198 polynucleotide phosphorylase         | PD0104 DNA polymerase III subunit chi                          |
|    | PD0244 hypothetical protein                 | PD0117 DNA repair protein RadC                                 |
|    | PD0266 two-component system, sensor protein | PD0166 phosphoribosylaminoimidazole-succinocarboxamidesynthase |
|    | PD0299 hypothetical protein                 | PD0288 hypothetical protein                                    |
|    | PD0303 hypothetical protein                 | PD0314 hypothetical protein                                    |
|    | PD0313 serine protease                      | PD0579 hypothetical protein                                    |
|    | PD0384 phage-related integrase              | PD0594 DNA topoisomerase IV subunit A                          |
|    | PD0407 enoyl-CoA hydratase                  | PD0641 hypothetical protein                                    |
|    | PD0478 peptidyl-prolyl cis-trans isomerase  | PD0812 DNA primase                                             |
|    | PD0556 hypothetical protein                 | PD0843 TonB protein                                            |
|    | PD0790 DNA primase                          | PD1159 transcriptional regulator                               |
|    | PD0891 TolQ protein                         | PD1209 hypothetical protein                                    |
|    | PD0912 hypothetical protein                 | PD1227 hypothetical protein                                    |
|    | PD0925 hypothetical protein                 | PD1232 DNA polymerase III subunit delta                        |
|    | PD0943 hypothetical protein                 | PD1257 cationic amino acid transporter                         |
|    | PD0986 hemagglutinin-like secreted protein  | PD1293 1-deoxy-D-xylulose-5-phosphate synthase                 |
|    | PD0987 hypothetical protein                 | PD1407 hypothetical protein                                    |
|    | PD1115 hypothetical protein                 | PD1424 hypothetical protein                                    |
|    | PD1139 phage-related integrase              | PD1426 hypothetical protein                                    |
|    | PD1240 hypothetical protein                 | PD1565 hypothetical protein                                    |
|    | PD1253 elongation factor P                  | PD1574 recombination associated protein                        |
|    | PD1328 hypothetical protein                 | PD1671 two-component, response regulator                       |
|    | PD1336 polysaccharide export protein        | PD1700 hypothetical protein                                    |
|    | PD1350 conjugal transfer protein            | PD1716 hypothetical protein                                    |
|    | PD1389 GumJ protein                         | PD1745 3,4-dihydroxy-2-butanone 4-phosphate synthase           |
|    | PD1549 UptF protein                         | PD1827 beta-hexosaminidase precursor                           |
|    | PD1558 DNA transport competence protein     | PD1980 pterin-4-alpha-carbinolamine dehydratase                |
|    | PD1729 hypothetical protein                 | PD1987 hypothetical protein                                    |
|    | PD1750 serine hydroxymethyltransferase      | PDa0002 replication protein                                    |
|    | PD1792 hemagglutinin-like protein           |                                                                |
|    | PD1815 hypothetical protein                 |                                                                |
|    | PD1926 fimbrial protein                     |                                                                |
|    | PD1993 temperature acclimation protein B    |                                                                |
|    | PD2116 hemagglutinin-like secreted protein  |                                                                |
|    | PD2118 hemagglutinin-like secreted protein  |                                                                |

Cluster I: Genes differentially expressed in XFM, XFM-glucan, and XFM-pectin in relation to PWG.

Cluster II: Genes differentially expressed in the presence of pectin and glucan in relation to XFM.

Cluster III: Genes differentially expressed in XFM in relation to PWG, but for which both glucan and pectin supplementation result in PWG-like expression.

Cluster IV: Genes differentially expressed in the presence of pectin only.

Cluster V: Genes differentially expressed in the presence of glucan only.

Cluster VI: Genes differentially expressed in the presence of pectin and glucan only.
