# Supplementary material
Source: PubMed Central journal article supplement (PMC2799766)
Supplement: 0908562106_ST3_PDF.pdf [file 0908562106_ST3_PDF.pdf]

**Table S3.** Description of genes with transcription rate quantified by qPCR in this study and biological information of their respective mutants

| Gene                   | Description                                                                                                                                      | Pathogenicity  | Transmission      | References |
|------------------------|--------------------------------------------------------------------------------------------------------------------------------------------------|----------------|-------------------|------------|
| <i>pglA</i> * (PD1485) | Required for pectin degradation                                                                                                                  | Non-virulent   | ND                | (1)        |
| <i>rpfF</i> (PD0407)   | Required for synthesis of DSF “cell-cell signaling factor”                                                                                       | Hyper-virulent | Non-transmissible | (2)        |
| <i>hxfA</i> (PD2118)   | Hemagglutinin-like secreted protein (afimbrial adhesin)                                                                                          | Hyper-virulent | Affected          | (3); (4)   |
| <i>hxfB</i> (PD1792)   | Hemagglutinin-like secreted protein (afimbrial adhesin)                                                                                          | Hyper-virulent | Affected          | (3); (4)   |
| <i>gumJ</i> (1389)     | Required for EPS synthesis (biological data are for mutants of <i>gumD</i> (PD1894) and <i>gumH</i> (1319), both are required for EPS synthesis) | Non-virulent † | Affected†         | D. Cooksey |
| <i>fimA</i> (PD0062)   | Required for type I pilus (short pilus) synthesis                                                                                                | Hyper-virulent | Affected†         | (5)        |
| <i>pilY1</i> (PD0023)  | Component of type IV pilus (long pilus)                                                                                                          | Non-virulent⊥  | Affected⊥†        | (5)        |
| <i>engxA</i> (PD1851)  | Required for glucan degradation                                                                                                                  | ND             | ND                |            |

\* Mutant produced from Fetzter strain, all other mutants produced from Temecula1.

† Unpublished data based on plant-to-plant transmission tests using *Graphocephala atropunctata* as a vector (Killiny and Almeida). ND, not determined.

⊥ Biological data is based on a *pilB* (PD1027) mutant, not *pilY1*; phenotype and gene regulation is expected to be similar for these genes.

## References

1. Roper MC, Greve LC, Labavitch JA, Kirkpatrick BC (2007) Detection and visualization of an exopolysaccharide produced by *Xylella fastidiosa* in vitro and in planta. *Appl Environ Microbiol* 73:7252-7258.
2. Newman KL, Almeida RPP, Purcell AH, Lindow SE (2004) Cell-cell signaling controls *Xylella fastidiosa* interactions with both insects and plants. *Proc Nat Acad Sci USA* 101:1737-1742.
3. Guilhabert MR, Kirkpatrick BC (2005) Identification of *Xylella fastidiosa* antivirulence genes: Hemagglutinin adhesins contribute to *X. fastidiosa* biofilm maturation and colonization and attenuate virulence. *Mol Plant Microbe Interact* 18:856-868.
4. Killiny N, Almeida RPP (2009) *Xylella fastidiosa* afimbrial adhesins mediate cell transmission to plants by leafhopper vectors. *Appl Environ Microbiol.* 75:521-528.
5. Meng Y, et al. (2005) Upstream migration of *Xylella fastidiosa* via pilus-driven twitching motility. *J Bacteriol.* 187:5560-5567.
